# Supplementary material for: Palladium(I) Dimer Enabled Extremely Rapid and Chemoselective Alkylation of Aryl Bromides over Triflates and Chlorides in Air
Source: PubMed Central journal article supplement — Angew Chem Int Ed Engl. 2017 May 16;56(25):7078–82. doi: 10.1002/anie.201701691 (PMC5488304; doi:10.1002/anie.201701691), 2017-05-16
Supplement: ANIE-56-7078-s001.pdf [file ANIE-56-7078-s001.pdf]

Supporting Information

**Palladium(I) Dimer Enabled Extremely Rapid and Chemoselective Alkylation of Aryl Bromides over Triflates and Chlorides in Air**

*Indrek Kalvet, Theresa Sperger, Thomas Scattolin, Guillaume Magnin, and Franziska Schoenebeck\**

anie\_201701691\_sm\_miscellaneous\_information.pdf

# Contents

|        |                                                                                         |    |
|--------|-----------------------------------------------------------------------------------------|----|
| 1.     | General Information .....                                                               | 3  |
| 2.     | Experimental procedures .....                                                           | 4  |
| 2.1.   | General procedure for Pd <sup>(I)</sup> -dimer catalyzed cross-coupling reactions ..... | 4  |
| 2.1.1. | <i>Kumada cross-coupling reaction</i> .....                                             | 4  |
| 2.1.2. | <i>Negishi cross-coupling reaction – Procedure A</i> .....                              | 4  |
| 2.1.3. | <i>Negishi cross-coupling reaction – Procedure B</i> .....                              | 5  |
| 2.1.4. | <i>Negishi cross-coupling reaction – Procedure C</i> .....                              | 5  |
| 2.1.5. | <i>Gram-scale Negishi alkylation reaction</i> .....                                     | 6  |
| 2.2.   | Reactivity comparison of Pd (pre-)catalysts .....                                       | 7  |
| 2.3.   | Pd <sup>(I)</sup> -dimer catalyzed cross-coupling with organometallic reagents.....     | 9  |
| 3.     | Synthetic procedures .....                                                              | 10 |
| 3.1.   | Synthesis of starting materials.....                                                    | 10 |
| 4.     | Characterization data.....                                                              | 12 |
| 4.1.   | Characterization data of cross-coupling products .....                                  | 12 |
| 5.     | Computational details.....                                                              | 22 |
| 6.     | NMR spectra .....                                                                       | 34 |
| 7.     | References .....                                                                        | 67 |

## 1. General Information

$^1\text{H}$ ,  $^{13}\text{C}$  and  $^{19}\text{F}$  NMR spectra were recorded either on Varian V-NMRS 600, Varian V-NMRS 400 or Varian Mercury 300 spectrometer.  $^1\text{H}$  and  $^{13}\text{C}$  spectra are referenced to residual solvent signals;  $\text{CDCl}_3$  7.26 ppm for  $^1\text{H}$  and 77.0 ppm for  $^{13}\text{C}$ . Chemical shifts ( $\delta$ ) of  $^{19}\text{F}$  NMR spectra are reported in ppm relative to trifluorotoluene (-62.78 ppm). Coupling constants ( $J$ ) are reported in Hz and coupling patterns are described as br = broad, s = singlet, d = doublet, t = triplet, q = quartet, m = multiplet. High resolution mass spectra (HRMS) were recorded on Thermo Scientific LTQ Orbitrap XL (ESI) or Finnigan MAT 95 (EI) spectrometer in positive ion mode. Melting points were measured with a LLG Labware MPM-H2 apparatus. Flash column chromatography was performed with Merck silica gel 60 (35–70 mesh). Thin layer chromatography (TLC) analyses were performed with aluminum sheets silica gel 60 F254 from Merck with detection by UV light,  $\text{KMnO}_4$  or phosphomolybdic acid (PMA) staining. Preparative HPLC was performed on a Gilson-Abimed HPLC (employing UV detector model 117) using a LiChrosorb Si 60 column (porosity 7  $\mu\text{m}$ , 250 x 25 mm).

Toluene, THF, hexane and DCM and  $\text{Et}_2\text{O}$  were dried by solvent purification system (Innovative Technology PS-MD-5). Unless stated otherwise, other anhydrous solvents as well as all starting materials, ligands and Pd-complexes were commercially available and used as received. Solvents used for column chromatography (pentane, hexane, ethyl acetate and DCM) were received in technical grade and distilled prior to use.  $\text{Pd}^{(I)}$ -I-dimer was prepared according to its corresponding literature procedure.<sup>[1]</sup> Aryl triflate starting materials were prepared according to a literature procedure<sup>[2]</sup> and the obtained characterization data matched those published.

## 2. Experimental procedures

### 2.1. General procedure for Pd<sup>(I)</sup>-dimer catalyzed cross-coupling reactions

#### 2.1.1. Kumada cross-coupling reaction

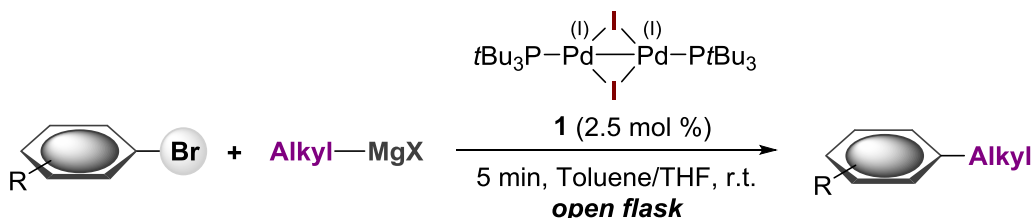

To a stirred solution of aryl halide (0.4 mmol) and Pd<sup>(I)</sup>-I-dimer (8.7 mg, 5  $\mu\text{mol}$ ) in 1.5 mL of toluene was added RMgCl (in THF, Et<sub>2</sub>O or 2-MeTHF, 0.8 mmol). The reaction was stirred for 5 minutes prior to quenching by the addition of hexane (6 mL) and filtration over a short plug of silica. The filtrate was concentrated under reduced pressure and the crude material was purified by silica gel column chromatography.

#### 2.1.2. Negishi cross-coupling reaction – Procedure A

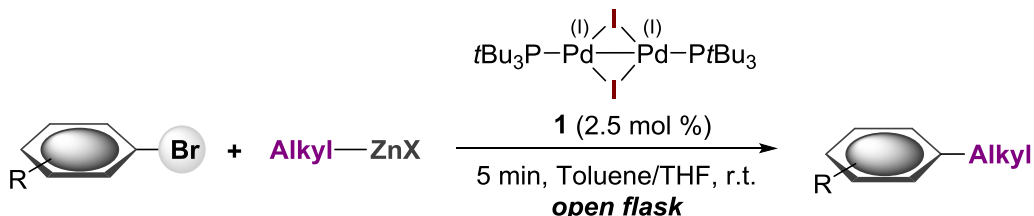

To a dry 16 mL vial under Ar atmosphere were added a solution of alkyl magnesium halide (in THF, Et<sub>2</sub>O or 2-MeTHF, 0.8 mmol) and ZnCl<sub>2</sub> (1M in THF, 840  $\mu\text{L}$ , 0.84 mmol) and stirred for 20 minutes. Followingly, the vial was opened and a solution of aryl bromide (0.4 mmol) and Pd<sup>(I)</sup>-I-dimer (8.7 mg, 0.01 mmol) in 1.5 mL of anhydrous toluene was added and the reaction mixture was stirred for 5 minutes. Thereafter, the reaction mixture was diluted with 3 mL of hexane and the solid residue was removed by filtration through a short plug of silica. The filtrate was concentrated under reduced pressure and purified by silica gel column chromatography.

#### Notes:

- 1) If the crude material contains significant amounts of the Pd(I) dimer (i.e. it is purple), then it should be extracted with MeCN to precipitate most of the remaining Pd(I) dimer catalyst which could then be removed by filtration through a short plug of silica, followed by removal of volatiles under reduced pressure. The isolated material may be still be colored due to traces of the Pd(I) I-dimer or its decomposition products, but neither will no longer interfere with column chromatography.
- 2) All reactions following this procedure were performed using organozinc reagent, obtained through transmetallation of an organomagnesium reagent with ZnCl<sub>2</sub>.
- 3) The sequence of addition (i.e. alkylzinc is added to substrate and catalyst or vice versa) did not affect the outcome of the reaction.

### 2.1.3. Negishi cross-coupling reaction – Procedure B

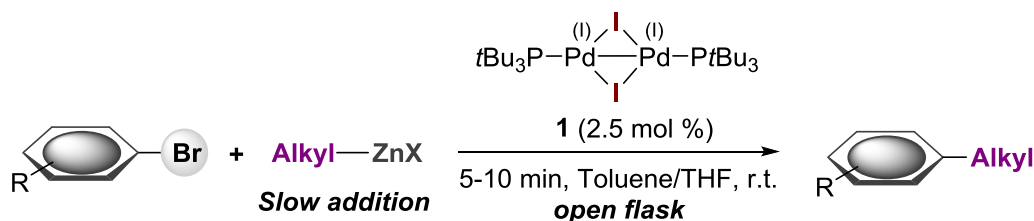

To a dry 16 mL vial under Ar atmosphere were added a solution of alkyl magnesium halide (in THF, Et<sub>2</sub>O or 2-MeTHF, 1 mmol) and ZnCl<sub>2</sub> (1M in THF, 1.10 mL, 1.1 mmol) and stirred for 20 minutes (some reagents gave a white precipitate, while others gave a clear solution). Followingly, a volume of the obtained solution, corresponding to 0.8 mmol of organozinc reagent was taken using a syringe and slowly added (drop-wise over 3-10 minutes) to another vial, containing a stirred solution of aryl bromide (0.4 mmol) and Pd<sup>(I)</sup>-I-dimer (8.7 mg, 0.01 mmol) in 1.5 mL of anhydrous toluene. Thereafter, the reaction mixture was diluted with 3 mL of hexane and the solid residue was removed by filtration through a short plug of silica. The filtrate was concentrated under reduced pressure and purified by silica gel column chromatography. *If the crude material contained significant visible traces of the Pd(I) dimer, then it was extracted with MeCN to precipitate most of the remaining Pd(I) dimer catalyst. The solution phase was filtered through a short plug of silica and concentrated under reduced pressure.*

### 2.1.4. Negishi cross-coupling reaction – Procedure C

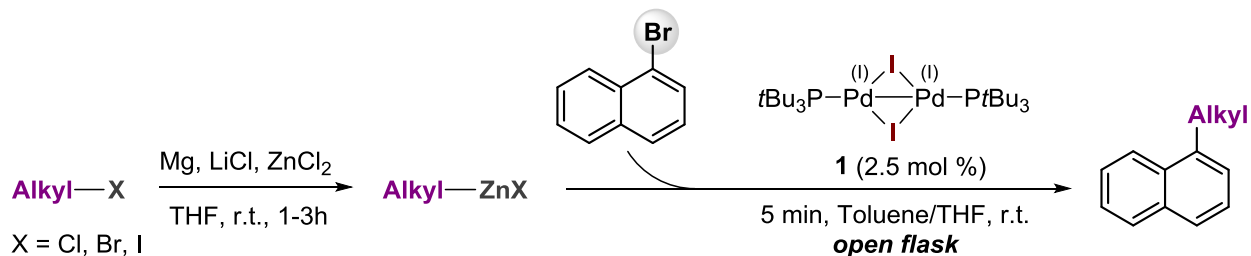

The organozinc reagents were prepared according to a literature procedure.<sup>[3]</sup> To a dry 16 mL vial were weighed Mg turnings (36 mg, 1.5 mmol), the vial was evacuated and flushed with argon, followed by the addition of the solutions of ZnCl<sub>2</sub> (1M in THF, 660 μL, 0.66 mmol) and LiCl (0.5M in THF, 1.5 mL, 0.75 mmol) and lastly alkyl halide (0.6 mmol). The mixture was stirred at room temperature for 3 hours.

Thereafter, the solution phase was transferred to another vial, containing a stirred solution of 1-bromonaphthalene (83 mg, 0.4 mmol) and Pd<sup>(I)</sup>-I-dimer (8.7 mg, 0.01 mmol) in 1.5 mL of anhydrous toluene. The reaction was stirred for 5 minutes and diluted with 3 mL of hexane, followed by the removal of the solid residue by filtration through a short plug of silica. The filtrate was concentrated under reduced pressure and purified by silica gel column chromatography. *If the crude material contained significant visible traces of the Pd(I) dimer, then it was extracted with MeCN to precipitate most of the remaining Pd(I) dimer catalyst. The solution phase was filtered through a short plug of silica and concentrated under reduced pressure.*

Preparation of the solution of ZnCl<sub>2</sub>: To a septum-capped Schlenk tube, equipped with a stir-bar was added 2.73 g (20 mmol) of ZnCl<sub>2</sub>. The tube was thereafter placed under vacuum and heated on a Bunsen burner until ZnCl<sub>2</sub> melted. It was left under vacuum and allowed to cool to room temperature. 20 mL of anhydrous THF was subsequently added and the solution stirred until all solids dissolved. We observed that organozinc reagents, prepared using flame-dried ZnCl<sub>2</sub> generally perform more consistently than those, prepared using ZnCl<sub>2</sub> that was dried overnight under vacuum at 140 °C.

### 2.1.5. Gram-scale Negishi alkylation reaction

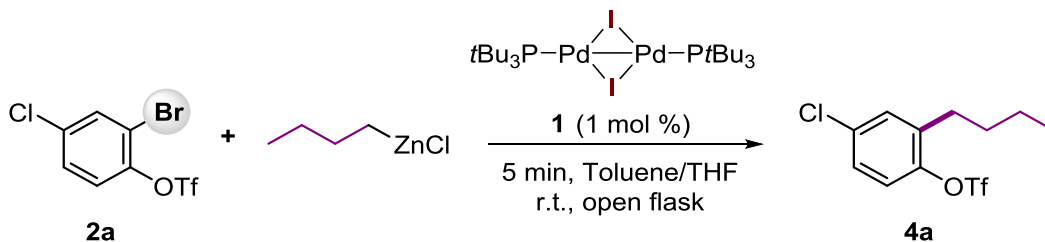

To a stirred solution of 2-bromo-4-chlorophenyl triflate **2a** (1.00 g, 2.95 mmol) and Pd<sup>(I)</sup>-dimer **1** (26 mg, 0.030 mmol) in 11 mL of toluene was added *n*-butylzinc chloride (prepared from mixing solutions of *n*-butylmagnesium chloride (2.45 mL, 2M in THF) and ZnCl<sub>2</sub> (6.3 mL, 1M in THF) and stirring for 20 minutes). The reaction was stirred for 5 minutes. Thereafter, the reaction mixture was diluted with 20 mL of hexane and the solid residue was removed by filtration through a short plug of silica and concentrated under reduced pressure. The obtained crude material was purified by silica gel column chromatography (40:1 Hexane/EtOAc) to obtain 0.844 g of 2-butyl-4-chlorophenyl triflate **4a** as a colorless oil in 91% yield.

#### Notes for safety:

1. *Organozinc and -magnesium reagents are moisture-sensitive and may react violently in air. As such, proper precautions should be taken when handling them in larger amounts, and especially under open flask conditions.*
2. *Due to high rate and exothermicity of the reaction, appropriate temperature control must be considered when further scaling up the reaction.*

## 2.2. Reactivity comparison of Pd (pre-)catalysts

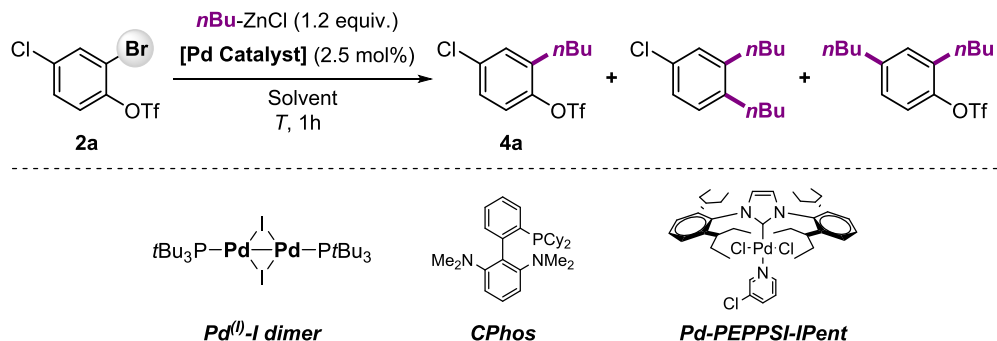

The reaction with **Pd<sup>(0)</sup> dimer** as a catalyst was performed following the Negishi cross-coupling procedure A.

**Procedure with [Pd-PEPPSI-IPent]:** In an argon filled glove-box, an oven-dried 4 mL vial, equipped with a stir bar was charged with Pd-PEPPSI-IPent (4.0 mg, 0.005 mmol, 2.5 mol%), **2a** (68 mg, 0.2 mmol, 1 equiv.) and toluene (1 mL). The vial was closed with a septum, taken out of the glove-box and cooled to 0°C in an ice bath for 5 min. In a separate oven-dried vial, under argon atmosphere, the solutions of *n*-Butylmagnesium chloride (2.0 M in THF, 120  $\mu\text{L}$ , 0.24 mmol, 1.2 equiv.) and  $\text{ZnCl}_2$  (1.0 M in THF, 260  $\mu\text{L}$ , 0.26 mmol, 1.3 equiv.) were mixed together for 15 minutes. The obtained solution of *n*-butylzinc chloride was added dropwise over 2 minutes at 0°C to the vial mentioned above. The vial was removed from the ice bath and allowed to stir at ambient temperature under argon atmosphere for 1h.

**Procedure with [PdOAc<sub>2</sub> / CPhos]:** In an argon filled glove-box, an oven-dried 4 mL vial, equipped with stir bar was charged with Pd(OAc<sub>2</sub>) (1.1 mg, 0.005 mmol, 2.5 mol%), CPhos (4.4 mg, 0.01 mmol, 5.0 mol%), **2a** (68 mg, 0.2 mmol, 1 equiv.) and THF (1 mL). The vial was closed with a septum, taken out of the glove-box and cooled to 0°C in an ice bath for 5 min. In a separate oven-dried vial under argon atmosphere, the solutions of *n*-Butylmagnesium chloride (2.0 M in THF, 120  $\mu\text{L}$ , 0.24 mmol, 1.2 equiv.) and  $\text{ZnCl}_2$  (1.0 M in THF, 260  $\mu\text{L}$ , 0.26 mmol, 1.3 equiv.) were mixed together for 15 minutes. The obtained solution of *n*-butylzinc chloride was added dropwise over 2 minutes at 0°C to the vial mentioned above. The vial was removed from the ice bath and allowed to stir at 60°C under argon atmosphere for 1h.

As a result, the following chromatograms were obtained by qualitative GC/MS analysis, describing the relative reactivities of the tested Pd-(pre-)catalysts.

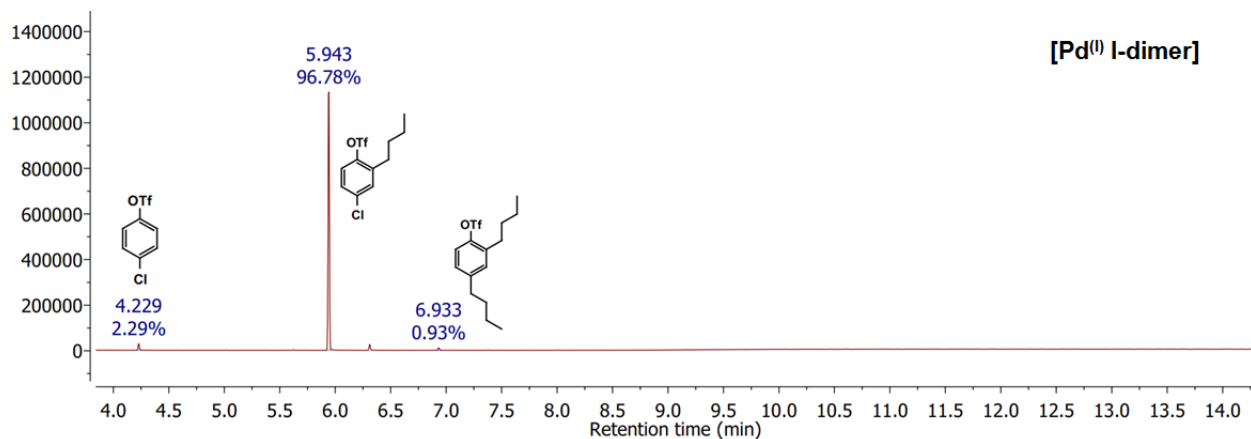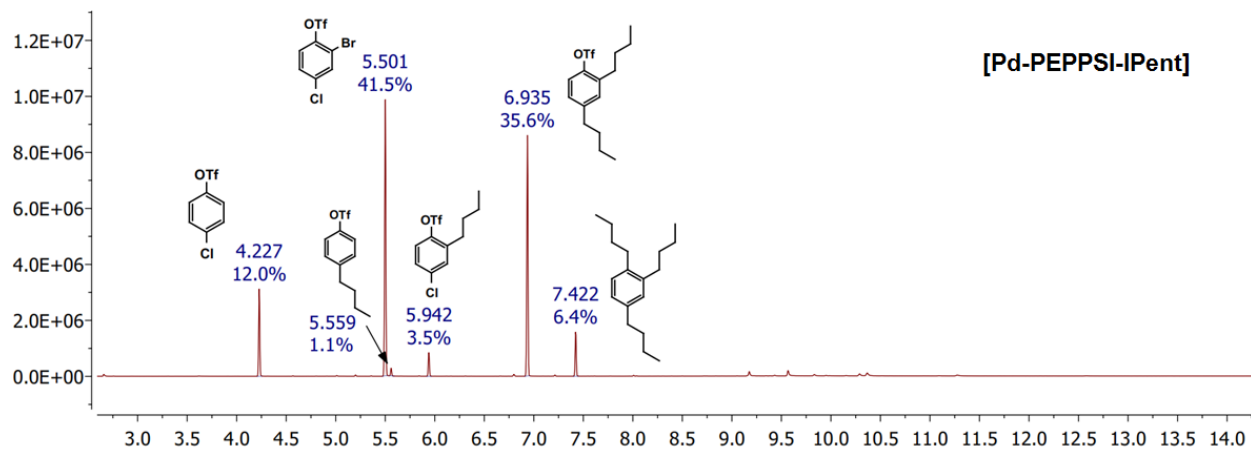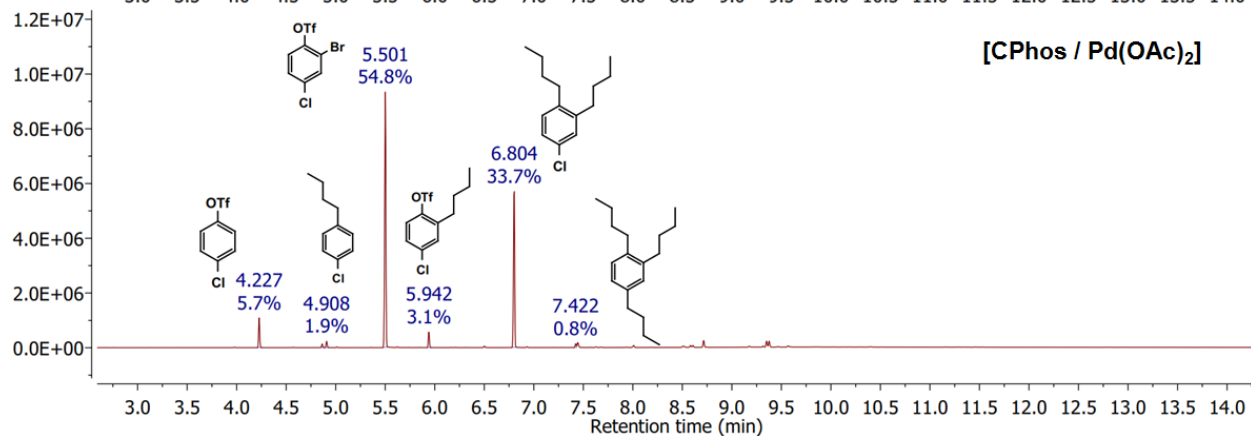



### 2.3. Pd<sup>(I)</sup>-dimer catalyzed cross-coupling with organometallic reagents

To determine the generality of using different organometallic reagents in the Pd(I) dimer catalyzed alkylation reaction we compared the coupling of 1-bromonaphthalene with butylzinc, -magnesium and -lithium reagents.

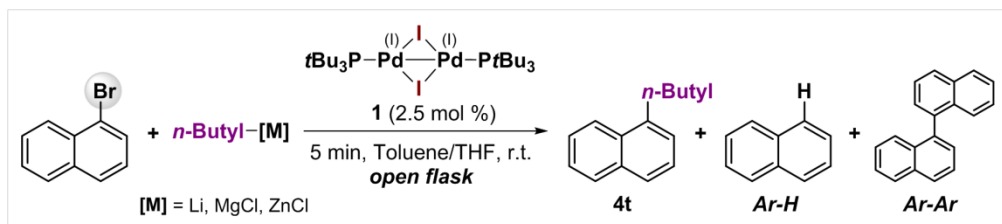

| Entry | [M]                      | Ar-Br | 4t <sup>[a]</sup> | Ar-H | Ar-Ar | Procedure              |
|-------|--------------------------|-------|-------------------|------|-------|------------------------|
| 1     | Li (2.5M)                | 14%   | <b>67%</b>        | 15%  | 4%    |                        |
| 2     | MgCl (2.0M)              | -     | <b>21%</b>        | 77%  | 2%    |                        |
| 3     | ZnCl (0.64M)             | -     | <b>96%</b>        | <2%  | <2%   |                        |
| 4     | Li (2.5M)                | -     | <b>62%</b>        | 24%  | 14%   | Slow addition (5 min.) |
| 5     | MgCl (0.6M in THF)       | -     | <b>26%</b>        | 76%  | 6%    | Slow addition (5 min.) |
| 6     | Li (0.6M in THF)         | -     | <b>3%</b>         | 9%   | 88%   | Slow addition (5 min.) |
| 7     | Li (0.6M in THF/toluene) | -     | <b>37%</b>        | 26%  | 38%   | Slow addition (5 min.) |

Procedure: To a vial, containing 1-bromonaphthalene (41 mg, 0.2 mmol) and catalyst **1** (4.4 mg, 0.005 mmol) in toluene (0.7 mL) was added a solution of butyl organometallic reagent either all in one go (entries 1-3) or drop-wise over 5 minutes (entries 3-7). After 5 minutes, the reaction mixture was diluted with 1.0 mL of hexane. An aliquot of 100  $\mu\text{L}$  was taken and diluted with 10 mL of hexane, followed by analysis of the mixture by calibrated GC/MS.

An authentic sample of the cross-coupling product (**4t**) was prepared by Pd(I) dimer (55 mg, 0.063 mmol) catalyzed coupling of 1-bromonaphthalene (515 mg, 2.5 mmol) with butylzinc chloride (prepared from 4.5 mmol of *n*-butylMgCl and 5 mmol of ZnCl<sub>2</sub>) in toluene (9 mL). The desired product was obtained after purification by column chromatography (hexane) as a colorless oil. 429 mg (93%). *R*<sub>f</sub> = 0.44 (Hexane). <sup>1</sup>H NMR (400 MHz, CDCl<sub>3</sub>)  $\delta$  8.08 (d, *J* = 8.3 Hz, 1H), 7.87 (d, *J* = 7.6 Hz, 1H), 7.72 (d, *J* = 8.2 Hz, 1H), 7.58 – 7.46 (m, 2H), 7.45 – 7.38 (m, 1H), 7.34 (d, *J* = 6.8 Hz, 1H), 3.17 – 3.00 (m, 2H), 1.83 – 1.69 (m, 2H), 1.55 – 1.43 (m, 2H), 1.00 (t, *J* = 7.4 Hz, 3H). <sup>13</sup>C NMR (101 MHz, CDCl<sub>3</sub>)  $\delta$  139.0, 133.9, 131.9, 128.7, 126.4, 125.8, 125.6, 125.5, 125.3, 123.9, 33.0, 32.8, 22.9, 14.0. MS (70eV, EI): *m/z* (%): 184 (30) [M<sup>+</sup>], 141 (100), 115 (21). These data are in agreement with those reported previously in the literature.<sup>[4]</sup>

### 3. Synthetic procedures

#### 3.1. Synthesis of starting materials

##### 4-bromophenylboronic acid pinacol ester

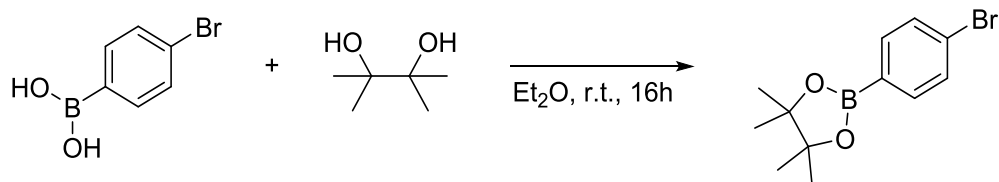

Performed according to a published procedure.<sup>[5]</sup> A mixture of 4-bromophenylboronic acid (1.00 g, 4.98 mmol) and pinacol (647 mg, 5.48 mmol, 1.1 equiv.) in anhydrous Et<sub>2</sub>O (11 mL) was stirred at room temperature for 16 hours. The resulting solution was diluted with Et<sub>2</sub>O (50 mL) and washed with water (2x 25 mL). The organic phase was separated, dried over MgSO<sub>4</sub> and concentrated under reduced pressure. The title product was obtained as a white solid in sufficient purity without any further purification. 1.263 g (90%). R<sub>f</sub> = 0.47 (20:1 Hexane/EtOAc). <sup>1</sup>H NMR (400 MHz, CDCl<sub>3</sub>) δ 7.66 (d, *J* = 8.2 Hz, 2H), 7.50 (d, *J* = 8.2 Hz, 2H), 1.34 (s, 12H). <sup>13</sup>C NMR (101 MHz, CDCl<sub>3</sub>) δ 136.3, 130.9, 126.2, 84.0, 24.8. MS (70eV, EI): *m/z* (%): 284 (34) 282 (35) [M<sup>+</sup>], 269 (88) 267 (89), 198 (70) 196 (71), 185 (91) 183 (100), 103 (35). The carbon adjacent to boron was not detected. These data are in agreement with those reported previously in the literature.<sup>[6]</sup>

##### 2-bromophenylboronic acid pinacol ester

2-bromophenylboronic acid pinacol ester was prepared according to the same procedure as 4-bromophenylboronic acid pinacol ester (see above), using 2-bromophenylboronic acid (1.00 g, 4.98 mmol) and pinacol (647 mg, 5.48 mmol, 1.1 equiv.). The title product was obtained as a colorless oil in sufficient purity without any further purification. 1.292 g (92%). R<sub>f</sub> = 0.33 (20:1 Hexane/EtOAc). <sup>1</sup>H NMR (400 MHz, CDCl<sub>3</sub>) δ 7.64 – 7.58 (m, 1H), 7.56 – 7.49 (m, 1H), 7.32 – 7.18 (m, 2H), 1.38 (s, 12H). <sup>13</sup>C NMR (101 MHz, CDCl<sub>3</sub>) δ 136.3, 132.6, 131.8, 128.0, 126.2, 84.3, 24.8. MS (70eV, EI): *m/z* (%): 284 (14) 282 (14) [M<sup>+</sup>], 203 (100), 185 (66) 183 (72), 161 (84), 103 (28). The carbon adjacent to boron was not detected. These data are in agreement with those reported previously in the literature.<sup>[6]</sup>

Adamantan-1-yl 3-bromothiophene-2-carboxylate

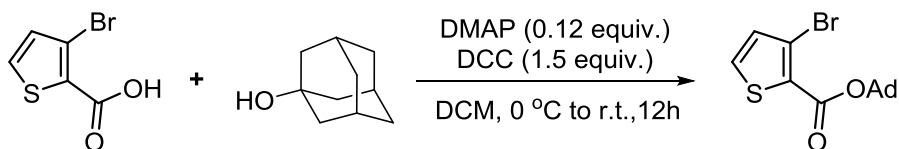

Performed according to an analogous literature procedure.<sup>[7]</sup> To a cooled (0 °C) solution of 3-bromothiophenecarboxylic acid (1.00 g, 4.83 mmol), 1-adamantanol (1.70 g, 11.17 mmol) and DMAP (70 mg, 0.57 mmol) in DCM (20 mL) was added *N,N*-dicyclohexycarbodiimide (DCC, 1.50 g, 7.27 mmol). Stirring was continued for 12h, while the reaction mixture was allowed to warm to r.t. slowly. The solvent was removed under reduced pressure, and the crude product was submitted to flash column chromatography using hexane/EtOAc (39:1) as eluent. The title product was obtained as a white solid. 1.11 g (67%).  $R_f = 0.29$  (24:1 Hexane/EtOAc). M.p. 97 - 98 °C.  $^1\text{H}$  NMR (400 MHz,  $\text{CDCl}_3$ )  $\delta$  7.40 (d,  $J = 5.2$  Hz, 1H), 7.05 (d,  $J = 5.2$  Hz, 1H), 2.28 - 2.24 (m, 6H), 2.21 (s, 3H), 1.81 - 1.62 (m, 6H).  $^{13}\text{C}$  NMR (101 MHz,  $\text{CDCl}_3$ )  $\delta$  159.6, 132.9, 130.5, 129.3, 116.0, 82.8, 41.5, 36.1, 30.9. MS (70eV, EI):  $m/z$  (%): 342 (3) 340 (2) [ $\text{M}^+$ ], 261 (18), 191 (31) 189 (30), 134 (100), 92 (36), 79 (23). HRMS (ESI) calculated for  $\text{C}_{15}\text{H}_{17}\text{BrO}_2\text{SNa}$ : 363.0025 [ $\text{M}+\text{Na}$ ] $^+$ , found: 363.0019.

5-(azidomethyl)-6-bromobenzof[d][1,3]dioxole

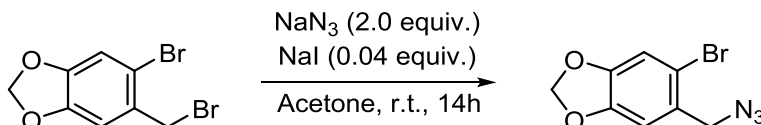

Performed according to a published procedure.<sup>[8]</sup> To a stirred solution of bromopiperonyl bromide (1.00 g, 3.4 mmol) in anhydrous acetone (60 mL) were added  $\text{NaN}_3$  (442 mg, 6.8 mmol) and NaI (20 mg, 0.13 mmol). The mixture was stirred for 14 hours, followed by the addition of water (40 mL). The mixture was extracted with  $\text{Et}_2\text{O}$  (3x 40 mL), the combined organic layers were dried over  $\text{MgSO}_4$  and concentrated under reduced pressure. The title product was as a off-white solid in sufficient purity without any further purification. 839 mg (96%).  $R_f = 0.54$  (10:1 Hexane/EtOAc).  $^1\text{H}$  NMR (600 MHz,  $\text{CDCl}_3$ )  $\delta$  7.05 (s, 1H), 6.87 (s, 1H), 6.01 (s, 2H), 4.39 (s, 2H).  $^{13}\text{C}$  NMR (151 MHz,  $\text{CDCl}_3$ )  $\delta$  148.4, 147.6, 127.9, 114.6, 113.0, 109.9, 102.0, 54.5. MS (70eV, EI):  $m/z$  (%): 257 (19) 255 (20) [ $\text{M}^+$ ], 227 (100), 215 (70) 213 (71), 148 (36), 90 (38), 63 (44). These data are in agreement with those reported previously in the literature.<sup>[9]</sup>

## 4. Characterization data

### 4.1. Characterization data of cross-coupling products

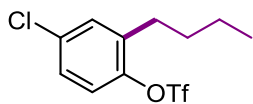

**2-butyl-4-chlorophenyl trifluoromethanesulfonate (4a):** Prepared, following the Negishi cross-coupling procedure A using *n*-butylzinc chloride (0.8 mmol). The title product was obtained after purification by column chromatography (40:1 Hexane/EtOAc) as a colorless oil. 122 mg (96%).  $R_f = 0.96$  (20:1 Hexane/EtOAc).  $^1\text{H}$  NMR (400 MHz,  $\text{CDCl}_3$ )  $\delta$  7.30 (d,  $J = 2.5$  Hz, 1H), 7.22 (dd,  $J = 8.8, 2.4$  Hz, 1H), 7.17 (d,  $J = 8.8$  Hz, 1H), 2.70 – 2.64 (m, 2H), 1.66 – 1.54 (m, 2H), 1.45 – 1.31 (m, 2H), 0.94 (t,  $J = 7.3$  Hz, 3H).  $^{13}\text{C}$  NMR (101 MHz,  $\text{CDCl}_3$ )  $\delta$  146.3, 137.5, 133.9, 131.0, 127.6, 122.5, 118.6 (q,  $J = 320.0$  Hz), 31.8, 29.6, 22.4, 13.7.  $^{19}\text{F}$  NMR (376 MHz,  $\text{CDCl}_3$ )  $\delta$  -73.96. MS (70eV, EI):  $m/z$  (%): 318 (9) 317 (3) 316 (23) [ $\text{M}^+$ ], 155 (3), 144 (3) 143 (36) 142 (9) 141 (100) 140 (3), 127 (4) 125 (6), 115 (4) 113 (5) 112 (5), 91 (9) 89 (4), 78 (3) 77 (15), 69 (10). HRMS (EI) calculated for  $\text{C}_{11}\text{H}_{12}\text{ClF}_3\text{O}_3\text{S}$ : 316.0142 [ $\text{M}^+$ ], found: 316.0149.

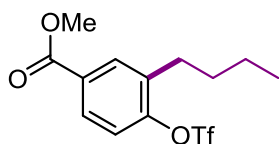

**Methyl 3-butyl-4-(trifluoromethylsulfonyloxy)benzoate (4b):** Prepared, following the Negishi cross-coupling procedure A using *n*-butylzinc chloride (0.6 mmol). The title product was obtained after purification by column chromatography (100:1 → 50:1 → 20:1 Hexane/EtOAc) as a light yellow oil. 107 mg (79%).  $R_f = 0.44$  (10:1 Hexane/EtOAc).  $^1\text{H}$  NMR (400 MHz,  $\text{CDCl}_3$ )  $\delta$  8.02 (d,  $J = 2.1$  Hz, 1H), 7.94 (dd,  $J = 8.6, 2.2$  Hz, 1H), 7.32 (d,  $J = 8.6$  Hz, 1H), 3.93 (s, 3H), 3.16 – 2.21 (m, 2H), 1.69 – 1.59 (m, 2H), 1.45 – 1.34 (m, 2H), 0.95 (t,  $J = 7.3$  Hz, 3H).  $^{13}\text{C}$  NMR (101 MHz,  $\text{CDCl}_3$ )  $\delta$  165.7, 150.9, 135.8, 132.6, 130.1, 129.0, 121.3, 118.5 (q,  $J = 320.0$  Hz), 52.4, 31.9, 29.6, 22.4, 13.7.  $^{19}\text{F}$  NMR (376 MHz,  $\text{CDCl}_3$ )  $\delta$  -73.87. MS (70eV, EI):  $m/z$  (%): 340 (67) [ $\text{M}^+$ ], 309 (32), 175 (25), 165 (100), 147 (34), 121 (31), 91 (24). HRMS (EI) calculated for  $\text{C}_{13}\text{H}_{15}\text{F}_3\text{O}_5\text{S}$ : 340.0587 [ $\text{M}^+$ ], found: 340.0583.

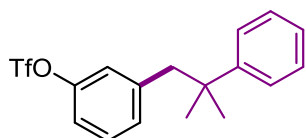

**3-(2-methyl-2-phenylpropyl)phenyl trifluoromethanesulfonate (4c):** Prepared, following the Negishi cross-coupling procedure A using 2-methyl-2-phenylpropylzinc chloride (0.6 mmol). The title product was obtained after purification by column chromatography (100:1 → 50:1 Hexane/EtOAc) as a light yellow oil. 134 mg (94%).  $R_f = 0.47$  (20:1 Hexane/EtOAc).  $^1\text{H}$  NMR (400 MHz,  $\text{CDCl}_3$ )  $\delta$  7.34 – 7.25 (m, 4H), 7.25 – 7.18 (m, 1H), 7.18 (d,  $J = 7.9$  Hz, 1H), 7.06 (dd,  $J = 8.2, 2.3$  Hz, 1H), 6.79 (d,  $J = 7.7$  Hz, 1H), 6.68 (s, 1H), 2.92 (s, 2H), 1.35 (s, 6H).  $^{13}\text{C}$  NMR (101 MHz,  $\text{CDCl}_3$ )  $\delta$  149.0, 147.7, 141.9, 130.2, 129.0, 128.1, 126.0, 126.0, 122.8, 118.7, 118.6 (q,  $J = 320.8$  Hz), 50.7, 38.8, 28.2.  $^{19}\text{F}$  NMR (376 MHz,  $\text{CDCl}_3$ )  $\delta$  -73.02. MS (70eV, EI):  $m/z$  (%): 358 (0.02) [ $\text{M}^+$ ], 165 (2), 119 (100), 91 (36). HRMS (EI) calculated for  $\text{C}_{17}\text{H}_{17}\text{F}_3\text{O}_3\text{S}$ : 358.0845 [ $\text{M}^+$ ], found: 358.0863.

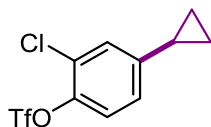

**2-chloro-4-cyclopropylphenyl trifluoromethanesulfonate (4d):** Prepared, following the Kumada cross-coupling procedure using cyclopropylmagnesium chloride (0.8 mmol). The title product was obtained after purification by column chromatography (20:1 Hexane/EtOAc) as a colorless oil. 89 mg (74%).  $R_f = 0.57$  (20:1 Hexane/EtOAc).  $^1\text{H}$  NMR (600 MHz,  $\text{CDCl}_3$ )  $\delta$  7.21 (d,  $J = 8.6$  Hz, 1H), 7.18 (d,  $J = 2.2$  Hz, 1H), 7.01 (dd,  $J = 8.6, 2.2$  Hz, 1H), 1.89 (tt,  $J = 8.4, 5.0$  Hz, 1H), 1.05 (ddd,  $J = 8.4, 6.5, 4.9$  Hz, 2H), 0.71 (dt,  $J = 6.6, 5.0$  Hz, 2H).  $^{13}\text{C}$  NMR (151 MHz,  $\text{CDCl}_3$ )  $\delta$  146.4, 143.4, 128.3, 127.0, 125.6, 122.7, 118.8 (q,  $J = 320.5$  Hz), 15.1, 10.1.  $^{19}\text{F}$  NMR (564 MHz,  $\text{CDCl}_3$ )  $\delta$  -73.52. MS (70eV, EI):  $m/z$  (%): 302 (10) 300 (27) [ $\text{M}^+$ ], 170 (3) 169 (33) 167 (100), 139 (15), 132 (11) 131 (15), 104 (19) 103 (82), 78 (10) 77 (42), 69 (23). HRMS (EI) calculated for  $\text{C}_{10}\text{H}_8\text{ClF}_3\text{O}_3\text{S}$ : 299.9829 [ $\text{M}^+$ ], found: 299.9837.

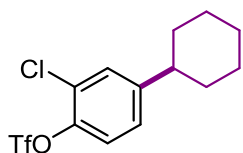

**2-chloro-4-cyclohexylphenyl trifluoromethanesulfonate (4e):** Prepared, following the Kumada cross-coupling procedure using cyclohexylmagnesium chloride (0.8 mmol). The title product was obtained after purification by column chromatography (20:1 Hexane/EtOAc) as a colorless oil. 112 mg (81%).  $R_f = 0.62$  (20:1 Hexane/EtOAc).  $^1\text{H}$  NMR (400 MHz,  $\text{CDCl}_3$ )  $\delta$  7.37 (d,  $J = 2.1$  Hz, 1H), 7.27 (d,  $J = 8.6$  Hz, 1H), 7.18 (dd,  $J = 8.5, 2.2$  Hz, 1H), 2.61 – 2.47 (m, 1H), 1.97 – 1.73 (m, 6H), 1.49 – 1.21 (m, 6H).  $^{13}\text{C}$  NMR (101 MHz,  $\text{CDCl}_3$ )  $\delta$  149.8, 143.5, 129.5, 126.7, 122.6, 118.6 (q,  $J = 320.7$  Hz), 43.9, 34.2, 26.6, 25.9.  $^{19}\text{F}$  NMR (376 MHz,  $\text{CDCl}_3$ )  $\delta$  -73.51. MS (70eV, EI):  $m/z$  (%): 345 (4) 344 (29) 342 (75) [ $\text{M}^+$ ], 211 (32) 209 (100), 173 (21), 155 (21) 153 (50), 145 (38) 143 (22) 141 (60), 131 (19) 129 (46) 127 (97), 99 (36), 81 (94), 69 (54). HRMS (ESI) calculated for  $\text{C}_{13}\text{H}_{14}\text{ClF}_3\text{O}_3\text{S}$ : 365.0197 [ $\text{M}+\text{Na}^+$ ], found: 365.0197.

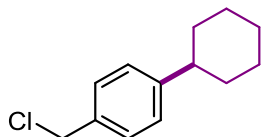

**1-(chloromethyl)-4-cyclohexylbenzene (4f):** Prepared, following the Negishi cross-coupling procedure B using cyclohexylzinc chloride (0.72 mmol). Slow addition was performed over 5 minutes. The title product was obtained after purification by column chromatography (Hexane) as a colorless oil. 54 mg (65%).  $R_f = 0.34$  (Hexane).  $^1\text{H}$  NMR (400 MHz,  $\text{CDCl}_3$ )  $\delta$  7.32 (d,  $J = 8.1$  Hz, 2H), 7.21 (d,  $J = 8.1$  Hz, 2H), 4.58 (s, 2H), 2.56 – 2.46 (m, 1H), 1.91 – 1.82 (m, 4H), 1.80 – 1.71 (m, 1H), 1.49 – 1.34 (m, 4H), 1.32 – 1.22 (m, 1H).  $^{13}\text{C}$  NMR (101 MHz,  $\text{CDCl}_3$ )  $\delta$  148.5, 134.8, 128.6, 127.2, 46.3, 44.3, 34.4, 26.8, 26.1. MS (70eV, EI):  $m/z$  (%): 210 (26) 208 (80) [ $\text{M}^+$ ], 173 (97), 159 (62), 154 (20) 152 (60), 129 (85), 117 (100), 91 (83). HRMS (EI) calculated for  $\text{C}_{13}\text{H}_{17}\text{Cl}$ : 208.1013 [ $\text{M}^+$ ], found: 208.1022.

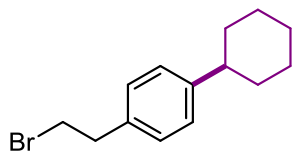

**1-(2-bromoethyl)-4-cyclohexylbenzene (4g):** Prepared, following the Negishi cross-coupling procedure B using cyclohexylzinc chloride (0.72 mmol). Slow addition was performed over 6 minutes. The title product was obtained after purification by column chromatography (200:1 Hexane/EtOAc) as a colorless oil. 72 mg (68%).  $R_f = 0.70$  (40:1 Hexane/EtOAc).  $^1\text{H}$  NMR (400 MHz,  $\text{CDCl}_3$ )  $\delta$  7.19 – 7.11 (m, 4H), 3.56 (t,  $J = 7.8$  Hz, 2H), 3.14 (t,  $J = 7.8$  Hz, 2H), 2.54 – 2.43 (m, 1H), 1.92 – 1.82 (m, 4H), 1.79 – 1.70 (m, 1H), 1.49 – 1.33 (m, 4H), 1.32 – 1.21 (m, 1H).  $^{13}\text{C}$  NMR (101 MHz,  $\text{CDCl}_3$ )  $\delta$  146.8, 136.2, 128.5, 127.0, 44.2, 39.1, 34.4, 33.0, 26.9, 26.1. MS (70eV, EI):  $m/z$  (%): 268 (73) 266 (76) [ $\text{M}^+$ ], 212 (34) 210 (35), 173 (37), 159 (74), 143 (57), 128 (52), 117 (100), 91 (79). HRMS (EI) calculated for  $\text{C}_{14}\text{H}_{19}\text{Br}$ : 266.0665 [ $\text{M}^+$ ], found: 266.0671.

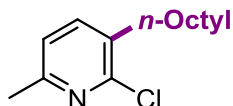

**2-chloro-6-methyl-3-octylpyridine (4h):** Prepared, following the Negishi cross-coupling procedure A using *n*-octylzinc chloride (0.72 mmol). The title product was obtained after purification by column chromatography (19:1 Hexane/EtOAc) as a colorless oil. 84 mg (87%).  $R_f = 0.36$  (19:1 Hexane/EtOAc).  $^1\text{H NMR}$  (400 MHz,  $\text{CDCl}_3$ )  $\delta$  7.40 (d,  $J = 7.6$  Hz, 1H), 7.00 (d,  $J = 7.6$  Hz, 1H), 2.69 – 2.63 (m, 2H), 2.49 (s, 3H), 1.65 – 1.55 (m, 2H), 1.38 – 1.21 (m, 10H), 0.91 – 0.84 (m, 3H).  $^{13}\text{C NMR}$  (101 MHz,  $\text{CDCl}_3$ )  $\delta$  156.4, 150.1, 138.9, 133.3, 122.0, 32.7, 31.8, 29.3, 29.3, 29.3, 29.2, 23.6, 22.6, 14.1. MS (70eV, EI):  $m/z$  (%): 241 (3) 239 (8) [ $\text{M}^+$ ], 204 (93), 154 (17), 140 (100), 77 (21), 57 (18). HRMS (ESI) calculated for  $\text{C}_{14}\text{H}_{23}\text{ClN}$ : 240.1514 [ $\text{M}+\text{H}$ ] $^+$ , found: 240.1513.

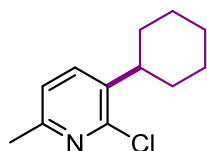

**2-chloro-3-cyclohexyl-6-methylpyridine (4i):** Prepared, following the Negishi cross-coupling procedure A using cyclohexylzinc chloride (0.72 mmol). The title product was obtained after purification by column chromatography (100:1 → 50:1 → 30:1 Hexane/EtOAc) as a colorless oil. 73 mg (87%).  $R_f = 0.23$  (20:1 Hexane/EtOAc).  $^1\text{H NMR}$  (600 MHz,  $\text{CDCl}_3$ )  $\delta$  7.44 (d,  $J = 7.8$  Hz, 1H), 7.03 (d,  $J = 7.8$  Hz, 1H), 2.90 (t,  $J = 12.0$  Hz, 1H), 2.47 (s, 3H), 1.93 – 1.81 (m, 4H), 1.79 – 1.73 (m, 1H), 1.43 (q,  $J = 12.7$  Hz, 2H), 1.33 – 1.19 (m, 3H).  $^{13}\text{C NMR}$  (101 MHz,  $\text{CDCl}_3$ )  $\delta$  156.0, 149.7, 137.7, 136.1, 122.2, 39.9, 32.8, 26.6, 26.0, 23.5. MS (70eV, EI):  $m/z$  (%): 211 (22) 209 (66) [ $\text{M}^+$ ], 174 (64), 166 (38) 168 (13), 155 (33) 153 (100), 140 (34). HRMS (ESI) calculated for  $\text{C}_{12}\text{H}_{17}\text{ClN}$ : 210.1044 [ $\text{M}+\text{H}$ ] $^+$ , found: 210.1043.

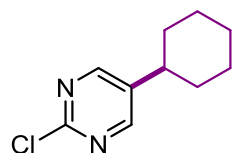

**2-chloro-5-cyclohexylpyrimidine (4j):** Prepared, following the Negishi cross-coupling procedure B using cyclohexylzinc chloride (0.8 mmol). Slow addition was performed over 5 minutes. The title product was obtained after purification by preparative HPLC (1:1 Pentane/EtOAc) as an off-white solid. 39 mg (50%).  $R_f = 0.70$  (1:1 Hexane/EtOAc). M.p. 101 - 102 °C.  $^1\text{H NMR}$  (400 MHz,  $\text{CDCl}_3$ )  $\delta$  8.44 (s, 2H), 2.52 (tt,  $J = 11.8, 3.0$  Hz, 1H), 1.92 – 1.72 (m, 5H), 1.46 – 1.20 (m, 5H).  $^{13}\text{C NMR}$  (101 MHz,  $\text{CDCl}_3$ )  $\delta$  159.0, 158.2, 138.7, 39.1, 33.6, 26.3, 25.5. MS (70eV, EI):  $m/z$  (%): 198 (19) 196 (57) [ $\text{M}^+$ ], 168 (12), 161 (15), 153 (16), 140 (100), 128 (21) 127 (19), 92 (12). HRMS (ESI) calculated for  $\text{C}_{10}\text{H}_{14}\text{ClN}_2$ : 197.0840 [ $\text{M}+\text{H}$ ] $^+$ , found: 197.0840.

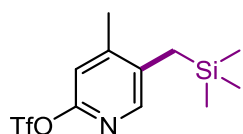

**4-methyl-5-((trimethylsilyl)methyl)pyridin-2-yl trifluoromethanesulfonate (4k):** Prepared, following the Negishi cross-coupling procedure A using (trimethylsilyl)methylzinc chloride (0.72 mmol). The title product was obtained after purification by column chromatography (100:1 → 50:1 → 30:1 Hexane/EtOAc) as a light yellow oil. 104 mg (79%).  $R_f = 0.37$  (10:1 Hexane/EtOAc).  $^1\text{H NMR}$  (400 MHz,  $\text{CDCl}_3$ )  $\delta$  7.93 (s, 1H), 6.93 (s, 1H), 2.29 (s, 3H), 2.10 (s, 2H), 0.04 (s, 9H).  $^{13}\text{C NMR}$  (101 MHz,  $\text{CDCl}_3$ )  $\delta$  153.1, 149.1, 147.1, 136.7, 118.6 (d,  $J = 320.7$  Hz), 115.7, 20.4, -1.5.  $^{19}\text{F NMR}$  (376 MHz,  $\text{CDCl}_3$ )  $\delta$  -73.41. MS (70eV, EI):  $m/z$  (%): 312 (9) [ $\text{M}^+$ ], 194 (100), 73 (86). HRMS (ESI) calculated for  $\text{C}_{11}\text{H}_{17}\text{F}_3\text{NO}_3\text{Si}$ : 328.0645 [ $\text{M}+\text{H}$ ] $^+$ , found: 328.0649.

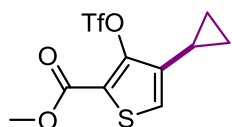

**Methyl 4-cyclopropyl-3-(trifluoromethylsulfonyloxy)thiophene-2-carboxylate (4l):**

Prepared, following the Negishi cross-coupling procedure A using cyclopropylzinc chloride (1.2 mmol). The title product was obtained after purification by column chromatography (85:15 Hexane/EtOAc) as a yellow oil. 110 mg (83%).  $R_f = 0.37$  (85:15 Hexane/EtOAc).  $^1\text{H NMR}$  (400 MHz,  $\text{CDCl}_3$ )  $\delta$  7.00 (s, 1H), 3.91 (s, 3H), 1.81 (tt,  $J = 8.4, 5.0$  Hz, 1H), 1.03 – 0.98 (m, 2H), 0.69 - 0.64 (m, 2H).  $^{13}\text{C NMR}$  (101 MHz,  $\text{CDCl}_3$ )  $\delta$  160.2, 144.7, 138.9, 123.7, 122.4, 118.5 (q,  $J = 320.6$  Hz), 52.4, 8.1, 8.1.  $^{19}\text{F NMR}$  (376 MHz,  $\text{CDCl}_3$ )  $\delta$  -73.49. MS (70eV, EI):  $m/z$  (%): 330 (52) [ $\text{M}^+$ ], 299 (11), 197 (42), 165 (100), 138 (25), 109 (17), 97 (42), 69 (27), 59 (27). HRMS (ESI) calculated for  $\text{C}_{10}\text{H}_9\text{F}_3\text{O}_5\text{S}_2\text{Na}$ : 352.9736 [ $\text{M}+\text{Na}$ ] $^+$ , found: 352.9730.

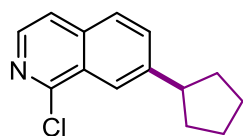

**1-chloro-7-cyclopentylisoquinoline (4m):** Prepared, following the Negishi cross-coupling procedure B using cyclopentylzinc chloride (0.8 mmol). Slow addition was performed over 5 minutes. The title product was obtained after purification by preparative HPLC (1:1 Pentane/EtOAc) as a yellow oil. 18 mg (20%).  $R_f = 0.71$  (1:1 Hexane/EtOAc).

$^1\text{H NMR}$  (400 MHz,  $\text{CDCl}_3$ )  $\delta$  8.19 (d,  $J = 5.6$  Hz, 1H), 8.12 (s, 1H), 7.74 (d,  $J = 8.5$  Hz, 1H), 7.64 (dd,  $J = 8.5, 1.6$  Hz, 1H), 7.53 (d,  $J = 5.6$  Hz, 1H), 3.26 – 3.16 (m, 1H), 2.23 – 2.07 (m, 2H), 1.95 – 1.61 (m, 6H).  $^{13}\text{C NMR}$  (101 MHz,  $\text{CDCl}_3$ )  $\delta$  151.0, 147.4, 140.6, 136.3, 131.5, 126.9, 126.8, 123.2, 120.5, 46.2, 34.5, 25.6. MS (70eV, EI):  $m/z$  (%): 233 (33) 231 (100) [ $\text{M}^+$ ], 204 (17) 202 (50), 189 (73), 176 (20), 166 (44), 154 (33), 140 (27), 127 (16). HRMS (ESI) calculated for  $\text{C}_{14}\text{H}_{14}\text{ClN}$ : 254.0707 [ $\text{M}+\text{Na}$ ] $^+$ , found: 254.0708.

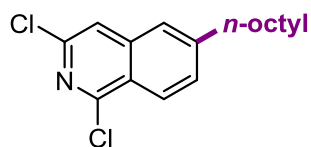

**1,3-dichloro-6-octylisoquinoline (4n):** Prepared, following the Negishi cross-coupling procedure B using *n*-octylzinc chloride (0.8 mmol). Slow addition was performed over 5 minutes. The title product was obtained after purification by preparative HPLC (9:1 Pentane/ $\text{Et}_2\text{O}$ ) as a colorless oil. 79 mg (64%).  $R_f = 0.66$  (9:1 Hexane/ $\text{Et}_2\text{O}$ ).

$^1\text{H NMR}$  (400 MHz,  $\text{CDCl}_3$ )  $\delta$  8.17 (d,  $J = 8.3$  Hz, 1H), 7.56 (s, 1H), 7.53 – 7.46 (m, 2H), 2.84 – 2.73 (m, 2H), 1.69 (p,  $J = 7.5$  Hz, 2H), 1.44 – 1.19 (m, 10H), 0.92 – 0.82 (m, 3H).  $^{13}\text{C NMR}$  (101 MHz,  $\text{CDCl}_3$ )  $\delta$  150.5, 147.8, 143.0, 139.6, 130.3, 126.3, 124.5, 124.2, 119.3, 36.1, 31.8, 30.8, 29.4, 29.2, 29.2, 22.6, 14.1. MS (70eV, EI):  $m/z$  (%): 311 (14) 309 (22) [ $\text{M}^+$ ], 213 (65) 211 (100), 176 (24), 140 (12). HRMS (ESI) calculated for  $\text{C}_{17}\text{H}_{22}\text{Cl}_2\text{N}$ : 310.1124 [ $\text{M}+\text{H}$ ] $^+$ , found: 310.1124.

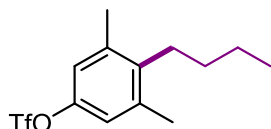

**4-butyl-3,5-dimethylphenyl trifluoromethanesulfonate (4o):** Prepared, following the Negishi cross-coupling procedure B. Slow addition was performed over 5 minutes. The title product was obtained after purification by column chromatography (100:1 → 50:1 Hexane/EtOAc) as a colorless oil. 123 mg (99%).

$R_f = 0.67$  (20:1 Hexane/EtOAc).  $^1\text{H NMR}$  (400 MHz,  $\text{CDCl}_3$ )  $\delta$  6.89 (s, 2H), 2.68 – 2.50 (m, 2H), 2.34 (s, 6H), 1.49 – 1.37 (m, 4H), 0.97 (t,  $J = 6.9$  Hz, 3H).  $^{13}\text{C NMR}$  (101 MHz,  $\text{CDCl}_3$ )  $\delta$  146.9, 140.3, 138.4, 120.1, 118.7 (q,  $J = 320.7$  Hz), 31.0, 29.1, 23.2, 20.0, 13.9.  $^{19}\text{F NMR}$  (376 MHz,  $\text{CDCl}_3$ )  $\delta$  -73.14. MS (70eV, EI):  $m/z$  (%): 310 (32) [ $\text{M}^+$ ], 267 (100), 203 (15), 135 (20), 91 (23). HRMS (ESI) calculated for  $\text{C}_{13}\text{H}_{17}\text{F}_3\text{O}_3\text{SNa}$ : 333.0743 [ $\text{M}+\text{Na}$ ] $^+$ , found: 333.0742.

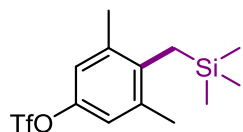

**3,5-dimethyl-4-((trimethylsilyl)methyl)phenyl trifluoromethanesulfonate (4p):**

Prepared, following the Negishi cross-coupling procedure A using (trimethylsilyl)methylzinc chloride (0.8 mmol). The title product was obtained after purification by column chromatography (100:1 → 50:1 Hexane/EtOAc) as a yellow oil. 126 mg (93%).  $R_f = 0.65$  (20:1 Hexane/EtOAc).  $^1\text{H NMR}$  (400 MHz,  $\text{CDCl}_3$ )  $\delta$  6.89 (s, 2H), 2.25 (s, 6H), 2.15 (s, 2H), 0.03 (s, 9H).  $^{13}\text{C NMR}$  (101 MHz,  $\text{CDCl}_3$ )  $\delta$  145.6, 139.1, 136.9, 119.9, 118.8 (q,  $J = 320.7$  Hz), 21.3, 20.1, -0.1.  $^{19}\text{F NMR}$  (376 MHz,  $\text{CDCl}_3$ )  $\delta$  -73.11. MS (70eV, EI):  $m/z$  (%): 340 (3) [ $\text{M}^+$ ], 325 (10), 207 (100), 177 (11), 118 (11), 91 (14), 73 (86). HRMS (ESI) calculated for  $\text{C}_{13}\text{H}_{19}\text{F}_3\text{O}_3\text{SSiNa}$ : 363.0669 [ $\text{M}+\text{Na}$ ] $^+$ , found: 363.0666.

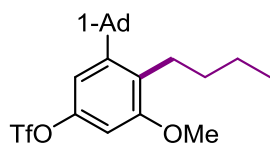

**3-(adamantan-1-yl)-4-butyl-5-methoxyphenyl trifluoromethanesulfonate (4q):**

Prepared, following the Negishi cross-coupling procedure B using *n*-butylzinc chloride (0.8 mmol). Slow addition was performed over 10 minutes. The title product was obtained after purification by column chromatography (100:1 → 60:1 Hexane/EtOAc) as a white solid. 134 mg (75%).  $R_f = 0.66$  (20:1 Hexane/EtOAc). M.p. 70 - 71 °C.  $^1\text{H NMR}$  (400 MHz,  $\text{CDCl}_3$ )  $\delta$  7.09 (s, 1H), 6.69 (s, 1H), 3.81 (s, 3H), 2.68 - 2.57 (m, 2H), 2.06 (br, 9H), 1.77 (br, 6H), 1.63 - 1.53 (m, 2H), 1.44 - 1.33 (m, 2H), 0.95 (t,  $J = 7.3$  Hz, 3H).  $^{13}\text{C NMR}$  (101 MHz,  $\text{CDCl}_3$ )  $\delta$  157.5, 145.9, 138.8, 128.7, 126.0, 118.6 (q,  $J = 320.0$  Hz), 104.6, 55.3, 40.5, 37.0 (2C), 32.5, 29.3, 29.0, 22.5, 13.8.  $^{19}\text{F NMR}$  (376 MHz,  $\text{CDCl}_3$ )  $\delta$  -74.09. MS (70eV, EI):  $m/z$  (%): 446 (100) [ $\text{M}^+$ ], 403 (42), 271 (73), 135 (74). HRMS (ESI) calculated for  $\text{C}_{22}\text{H}_{29}\text{F}_3\text{O}_4\text{SNa}$ : 469.1631 [ $\text{M}+\text{Na}$ ] $^+$ , found: 469.1627.

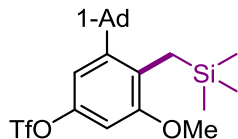

**3-(adamantan-1-yl)-5-methoxy-4-((trimethylsilyl)methyl)phenyl trifluoromethanesulfonate (4r):**

Prepared, following the Negishi cross-coupling procedure B using (trimethylsilyl)methylzinc chloride (1.0 mmol). Slow addition was performed over 3 minutes. The title product was obtained after purification by column chromatography (100:1 → 50:1 Hexane/EtOAc) as a white solid. 171 mg (90%).  $R_f = 0.69$  (20:1 Hexane/EtOAc). M.p. 93 - 94 °C.  $^1\text{H NMR}$  (400 MHz,  $\text{CDCl}_3$ )  $\delta$  6.90 (s, 1H), 6.68 (s, 1H), 3.79 (s, 3H), 2.07 (s, 2H), 2.04 (br, 9H), 1.77 (s, 6H), 0.00 (s, 9H).  $^{13}\text{C NMR}$  (101 MHz,  $\text{CDCl}_3$ )  $\delta$  156.3, 144.8, 138.6, 128.7, 123.9, 118.6 (q,  $J = 320.6$  Hz), 104.7, 55.3, 40.5, 37.0, 36.9, 29.0, 20.2, -1.7.  $^{19}\text{F NMR}$  (376 MHz,  $\text{CDCl}_3$ )  $\delta$  -74.18. MS (70eV, EI):  $m/z$  (%): 476 (23) [ $\text{M}^+$ ], 343 (63), 270 (100), 254 (22), 73 (54). HRMS (ESI) calculated for  $\text{C}_{22}\text{H}_{31}\text{F}_3\text{O}_4\text{SSiNa}$ : 499.1557 [ $\text{M}+\text{Na}$ ] $^+$ , found: 449.1549.

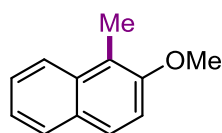

**2-methoxy-1-methylnaphthalene (6a):**

Prepared, following the Kumada cross-coupling procedure using methylmagnesium chloride (0.8 mmol). The title product was obtained after purification by column chromatography (15:1 Hexane/EtOAc) as an off-white solid. 58 mg (84%).  $R_f = 0.57$  (15:1 Hexane/EtOAc).  $^1\text{H NMR}$  (600 MHz,  $\text{CDCl}_3$ )  $\delta$  8.00 (d,  $J = 8.6$  Hz, 1H), 7.83 (d,  $J = 8.2$  Hz, 1H), 7.76 (d,  $J = 9.0$  Hz, 1H), 7.53 (ddd,  $J = 8.4, 6.8, 1.2$  Hz, 1H), 7.39 (td,  $J = 7.4, 6.8, 0.9$  Hz, 1H), 7.30 (d,  $J = 9.0$  Hz, 1H), 3.98 (s, 3H), 2.61 (s, 3H).  $^{13}\text{C NMR}$  (151 MHz,  $\text{CDCl}_3$ )  $\delta$  154.3, 133.6, 129.0, 128.3, 127.1, 126.1, 123.4, 123.2, 119.3, 113.6, 56.7, 10.5. MS (70eV, EI):  $m/z$  (%): 172 (100) [ $\text{M}^+$ ], 157 (32), 141 (14), 129 (53), 128 (51), 115 (11). These data are in agreement with those reported previously in the literature.<sup>[10]</sup>



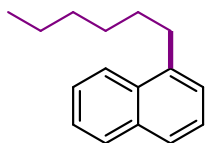

**1-hexylnaphthalene (6b):** Prepared, following the Negishi cross-coupling procedure C using 1-bromohexane (0.6 mmol). The title product was obtained after purification by column chromatography (Hexane) as a colorless oil. 80 mg (94%).  $R_f = 0.44$  (Hexane).  $^1\text{H}$  NMR (400 MHz,  $\text{CDCl}_3$ )  $\delta$  8.08 (d,  $J = 8.2$  Hz, 1H), 7.88 (d,  $J = 7.5$  Hz, 1H), 7.73 (d,  $J = 8.1$  Hz, 1H), 7.57 – 7.45 (m, 2H), 7.45 – 7.39 (m, 1H), 7.35 (d,  $J = 6.8$  Hz, 1H), 3.18 – 2.98 (m, 2H), 1.78 (p,  $J = 7.6$  Hz, 2H), 1.47 (p,  $J = 6.9$  Hz, 2H), 1.41 – 1.33 (m, 4H), 0.93 (t,  $J = 7.0$  Hz, 3H).  $^{13}\text{C}$  NMR (101 MHz,  $\text{CDCl}_3$ )  $\delta$  139.0, 133.9, 131.9, 128.7, 126.3, 125.8, 125.6, 125.5, 125.3, 123.9, 33.1, 31.8, 30.8, 29.5, 22.7, 14.1. MS (70eV, EI):  $m/z$  (%): 212 (26) [ $\text{M}^+$ ], 153 (6), 141 (100), 128 (6), 115 (18). These data are in agreement with those reported previously in the literature.

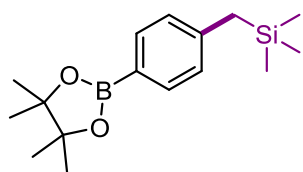

**4-(trimethylsilyl)methylphenylboronic acid pinacol ester (6c):** Prepared, following the Negishi cross-coupling procedure A. The title product was obtained after purification by column chromatography (100:1  $\rightarrow$  50:1  $\rightarrow$  40:1 Hexane/EtOAc) as a white solid. 97 mg (84%).  $R_f = 0.43$  (20:1 Hexane/EtOAc). M.p. 72 - 73  $^\circ\text{C}$ .  $^1\text{H}$  NMR (600 MHz,  $\text{CDCl}_3$ )  $\delta$  7.67 (d,  $J = 7.9$  Hz, 2H), 7.01 (d,  $J = 7.9$  Hz, 2H), 2.11 (s, 2H), 1.34 (s, 12H), -0.02 (s, 9H).  $^{13}\text{C}$  NMR (151 MHz,  $\text{CDCl}_3$ )  $\delta$  144.3, 134.7, 127.5, 83.5, 27.7, 24.9, -1.9. MS (70eV, EI):  $m/z$  (%): 290 (11) [ $\text{M}^+$ ], 275 (8), 190 (60), 175 (28), 148 (100), 73 (44). HRMS (ESI) calculated for  $\text{C}_{16}\text{H}_{27}\text{BO}_2\text{SiNa}$ : 313.1766 [ $\text{M}+\text{Na}^+$ ], found: 313.1765. The carbon adjacent to boron was not detected.

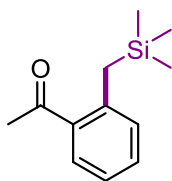

**1-(trimethylsilylmethyl)acetophenone (6d):** Prepared, following the Negishi cross-coupling procedure A. The title product was obtained after purification by column chromatography (100:1  $\rightarrow$  50:1 Hexane/EtOAc) as a light yellow oil. 64 mg (78%).  $R_f = 0.35$  (20:1 Hexane/EtOAc).  $^1\text{H}$  NMR (600 MHz,  $\text{CDCl}_3$ )  $\delta$  7.70 (d,  $J = 7.8$  Hz, 1H), 7.38 – 7.28 (m, 1H), 7.19 – 7.10 (m, 1H), 7.06 (d,  $J = 7.7$  Hz, 1H), 2.62 (s, 2H), 2.57 (s, 3H), -0.05 (s, 9H).  $^{13}\text{C}$  NMR (151 MHz,  $\text{CDCl}_3$ )  $\delta$  201.4, 142.4, 135.5, 131.3, 131.0, 130.0, 123.7, 29.6, 25.2, -1.5. MS (70eV, EI):  $m/z$  (%): 206 (3) [ $\text{M}^+$ ], 191 (100), 115 (8), 73 (25). These data are in agreement with those reported previously in the literature.<sup>[11]</sup>

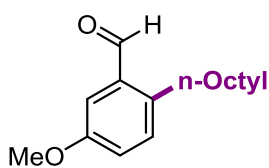

**5-methoxy-2-octylbenzaldehyde (6e):** Prepared, following the Negishi cross-coupling procedure A. The title product was obtained after purification by column chromatography (1:1 Hexane/DCM) as a yellow oil. 87 mg (87%).  $R_f = 0.38$  (1:1 Hexane/DCM).  $^1\text{H}$  NMR (400 MHz,  $\text{CDCl}_3$ )  $\delta$  10.30 (s, 1H), 7.36 (d,  $J = 2.9$  Hz, 1H), 7.18 (d,  $J = 8.4$  Hz, 1H), 7.07 (dd,  $J = 8.4, 2.9$  Hz, 1H), 3.84 (s, 3H), 2.97 – 2.91 (m, 2H), 1.64 – 1.53 (m, 2H), 1.40 – 1.22 (m, 10H), 0.88 (t,  $J = 6.9$  Hz, 3H).  $^{13}\text{C}$  NMR (101 MHz,  $\text{CDCl}_3$ )  $\delta$  191.5, 158.1, 138.5, 134.2, 132.1, 121.2, 112.8, 55.5, 33.0, 31.8, 31.3, 29.4 (2C), 29.2, 22.6, 14.1. MS (70eV, EI):  $m/z$  (%): 248 (69) [ $\text{M}^+$ ], 173 (12), 159 (83), 149 (100), 147 (55), 135 (27), 121 (94), 91 (37), 77 (25). HRMS (ESI) calculated for  $\text{C}_{16}\text{H}_{24}\text{O}_2\text{Na}$ : 271.1669 [ $\text{M}+\text{Na}^+$ ], found: 271.1666.

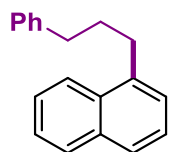

**1-(3-phenylpropyl)naphthalene (6f):** Prepared, following the Negishi cross-coupling procedure C using 1-iodo-3-phenylpropane (0.6 mmol). The title product was obtained after purification by column chromatography (100% Hexane → 50:1 Hexane/EtOAc) as a light yellow oil. 79 mg (81%).  $R_f = 0.19$  (Hexane).  $^1\text{H NMR}$  (400 MHz,  $\text{CDCl}_3$ )  $\delta$  8.06 – 7.96 (m, 1H), 7.95 – 7.88 (m, 1H), 7.76 (d,  $J = 8.1$  Hz, 1H), 7.57 – 7.49 (m, 2H), 7.48 – 7.41 (m, 1H), 7.40 – 7.32 (m, 3H), 7.30 – 7.25 (m, 3H), 3.16 (t,  $J = 7.6$  Hz, 2H), 2.82 (t,  $J = 7.6$  Hz, 2H), 2.16 (p,  $J = 7.6$  Hz, 2H).  $^{13}\text{C NMR}$  (101 MHz,  $\text{CDCl}_3$ )  $\delta$  142.1, 138.4, 133.9, 131.9, 128.7, 128.5, 128.3, 126.5, 125.9, 125.8, 125.7, 125.5, 125.4, 123.8, 35.9, 32.5, 32.2. MS (70eV, EI):  $m/z$  (%): 246 (36) [ $\text{M}^+$ ], 155 (16), 142 (100), 141 (69), 115 (27). These data are in agreement with those reported previously in the literature.

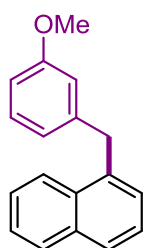

**1-(3-methoxybenzyl)naphthalene (6g):** Prepared, following the Negishi cross-coupling procedure C using 3-methoxybenzyl bromide (0.6 mmol). The title product was obtained after purification by column chromatography (100:1 → 50:1 Hexane/EtOAc) as a colorless oil. 81 mg (82%).  $R_f = 0.33$  (20:1 Hexane/EtOAc).  $^1\text{H NMR}$  (600 MHz,  $\text{CDCl}_3$ )  $\delta$  8.01 – 7.95 (m, 1H), 7.86 – 7.81 (m, 1H), 7.74 (d,  $J = 8.2$  Hz, 1H), 7.47 – 7.38 (m, 3H), 7.28 (d,  $J = 7.0$  Hz, 1H), 7.19 – 7.15 (m, 1H), 6.75 – 6.70 (m, 3H), 4.41 (s, 2H), 3.72 (s, 3H).  $^{13}\text{C NMR}$  (151 MHz,  $\text{CDCl}_3$ )  $\delta$  159.7, 142.3, 136.4, 133.9, 132.1, 129.4, 128.6, 127.3, 127.1, 125.9, 125.5, 124.2, 121.2, 114.7, 111.1, 55.1, 39.0. MS (70eV, EI):  $m/z$  (%): 248 (100) [ $\text{M}^+$ ], 233 (15), 217 (42), 202 (30), 189 (11), 141 (19), 115 (15). These data are in agreement with those reported previously in the literature.<sup>[12]</sup>

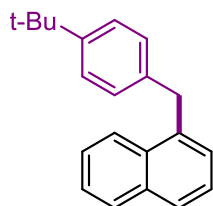

**1-(4-(tert-butyl)benzyl)naphthalene (6h):** Prepared, following the Negishi cross-coupling procedure C using 4-*tert*-butylbenzyl chloride (0.6 mmol). The title product was obtained after purification by column chromatography (100:1 → 50:1 → 20:1 Hexane/EtOAc) as a white solid. 108 mg (98%).  $R_f = 0.52$  (40:1 Hexane/EtOAc).  $^1\text{H NMR}$  (400 MHz,  $\text{CDCl}_3$ )  $\delta$  8.11 – 8.05 (m, 1H), 7.93 – 7.86 (m, 1H), 7.80 (d,  $J = 8.2$  Hz, 1H), 7.52 – 7.43 (m, 3H), 7.36 – 7.31 (m, 3H), 7.18 (d,  $J = 8.2$  Hz, 2H), 4.47 (s, 2H), 1.34 (s, 9H).  $^{13}\text{C NMR}$  (101 MHz,  $\text{CDCl}_3$ )  $\delta$  148.8, 137.5, 136.8, 133.9, 132.2, 128.6, 128.3, 128.0, 127.2, 125.9, 125.5, 125.5, 125.3, 124.3, 38.4, 34.3, 31.4. MS (70eV, EI):  $m/z$  (%): 274 (49) [ $\text{M}^+$ ], 259 (100), 217 (21), 141 (62), 115 (25). These data are in agreement with those reported previously in the literature.<sup>[13]</sup>

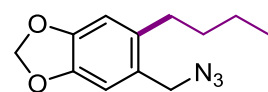

**5-(azidomethyl)-6-butylbenzo[d][1,3]dioxole (6i):** Prepared, following the Negishi cross-coupling procedure B using butylzinc chloride (0.6 mmol) and 5 mol% Pd(I) I-dimer (17.4 mg, 0.02 mmol). Slow addition was performed over 5 minutes. The title product was obtained after purification by column chromatography (100:1 → 50:1 Hexane/EtOAc) as a colorless oil. 56 mg (60%).  $R_f = 0.25$  (20:1 Hexane/EtOAc).  $^1\text{H NMR}$  (400 MHz,  $\text{CDCl}_3$ )  $\delta$  6.76 (s, 1H), 6.72 (s, 1H), 5.94 (s, 2H), 4.26 (s, 2H), 2.69 – 2.43 (m, 2H), 1.59 – 1.46 (m, 2H), 1.45 – 1.31 (m, 2H), 0.95 (t,  $J = 7.3$  Hz, 3H).  $^{13}\text{C NMR}$  (101 MHz,  $\text{CDCl}_3$ )  $\delta$  147.7, 145.7, 135.6, 125.7, 109.9, 109.7, 101.1, 52.3, 33.6, 32.2, 22.6, 14.0. MS (70eV, EI):  $m/z$  (%): 233 (17) [ $\text{M}^+$ ], 205 (37), 176 (16), 162 (33), 149 (100), 132 (48), 104 (16), 77 (24). HRMS (EI) calculated for  $\text{C}_{12}\text{H}_{15}\text{N}_3\text{O}_2$ : 233.1159 [ $\text{M}^+$ ], found: 233.1164.

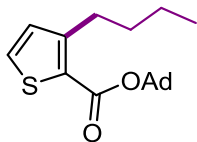

**Adamantan-1-yl 3-butylthiophene-2-carboxylate (6j):** Prepared, following the Negishi cross-coupling procedure A using butylzinc chloride (1.2 mmol). The title product was obtained after purification by column chromatography (24:1 Hexane/EtOAc) as a white solid. 112 mg (88%).  $R_f = 0.29$  (24:1 Hexane/EtOAc). M.p. 69 - 70 °C.  $^1\text{H NMR}$  (400 MHz,  $\text{CDCl}_3$ )  $\delta$  7.32 (d,  $J = 5.1$  Hz, 1H), 6.91 (d,  $J = 5.1$  Hz, 1H), 3.01 – 2.92 (m, 2H), 2.26 – 2.23 (m, 6H), 2.21 (br, 3H), 1.77 – 1.65 (m, 6H), 1.64 – 1.55 (m, 2H), 1.44 – 1.28 (m, 2H), 0.93 (t,  $J = 7.3$  Hz, 3H).  $^{13}\text{C NMR}$  (101 MHz,  $\text{CDCl}_3$ )  $\delta$  161.8, 150.0, 130.6, 129.3, 128.7, 81.5, 41.6, 36.2, 32.7, 30.9, 29.4, 22.6, 14.0. MS (70eV, EI):  $m/z$  (%): 318 (0.8) [ $\text{M}^+$ ], 182 (5), 167 (6), 135 (100), 125 (7), 93 (10), 79 (10). HRMS (ESI) calculated for  $\text{C}_{19}\text{H}_{26}\text{O}_2\text{SNa}$ : 341.1546 [ $\text{M}+\text{Na}$ ] $^+$ , found: 341.1544.

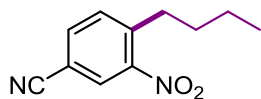

**4-butyl-3-nitrobenzonitrile (6k):** Prepared, following the Negishi cross-coupling procedure B using *n*-butylzinc chloride (0.72 mmol). Slow addition was performed over 5 minutes. The title product was obtained after purification by column chromatography (50:1 → 30:1 → 20:1 Hexane/EtOAc) as a yellow oil. 53 mg (65%).  $R_f = 0.2$  (10:1 Hexane/EtOAc).  $^1\text{H NMR}$  (400 MHz,  $\text{CDCl}_3$ )  $\delta$  8.16 (d,  $J = 1.7$  Hz, 1H), 7.78 (dd,  $J = 8.0, 1.7$  Hz, 1H), 7.50 (d,  $J = 8.0$  Hz, 1H), 2.97 – 2.91 (m, 2H), 1.69 – 1.58 (m, 2H), 1.47 – 1.35 (m, 2H), 0.95 (t,  $J = 7.3$  Hz, 3H).  $^{13}\text{C NMR}$  (101 MHz,  $\text{CDCl}_3$ )  $\delta$  149.4, 143.1, 135.4, 133.0, 128.3, 116.6, 111.2, 32.9, 32.5, 22.6, 13.7. MS (70eV, EI):  $m/z$  (%): 204 (2) [ $\text{M}^+$ ], 187 (100), 169 (35), 159 (25), 145 (77), 131 (21), 117 (49), 90 (26). HRMS (EI) calculated for  $\text{C}_{11}\text{H}_{12}\text{N}_2\text{O}_2$ : 204.0893 [ $\text{M}$ ] $^+$ , found: 204.0902.

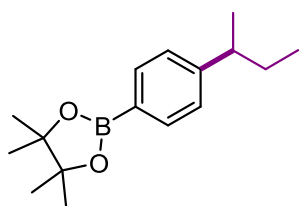

**4-(1-methyl)propylphenylboronic acid pinacol ester (6l):** Prepared, following the Negishi cross-coupling procedure B using *sec*-butylzinc chloride (0.8 mmol). Slow addition was performed over 3 minutes. The title product was obtained after purification by column chromatography (100:1 → 50:1 → 20:1 Hexane/EtOAc) as a white solid. 58 mg (56%).  $R_f = 0.43$  (20:1 Hexane/EtOAc).  $^1\text{H NMR}$  (600 MHz,  $\text{CDCl}_3$ )  $\delta$  7.75 (d,  $J = 8.0$  Hz, 2H), 7.20 (d,  $J = 8.0$  Hz, 2H), 2.61 (h,  $J = 7.0$  Hz, 1H), 1.63 – 1.58 (m, 2H), 1.34 (s, 12H), 1.24 (d,  $J = 6.9$  Hz, 3H), 0.82 (t,  $J = 7.4$  Hz, 3H).  $^{13}\text{C NMR}$  (151 MHz,  $\text{CDCl}_3$ )  $\delta$  151.1, 134.8, 126.5, 83.6, 41.9, 31.0, 24.8, 21.7, 12.2. MS (70eV, EI):  $m/z$  (%): 260 (17) [ $\text{M}^+$ ], 231 (100), 161 (27), 131 (24), 105 (13). These data are in agreement with those reported previously in the literature.<sup>[14]</sup> The carbon adjacent to boron was not detected. No isomeric products were detected by  $^1\text{H NMR}$  spectroscopy.

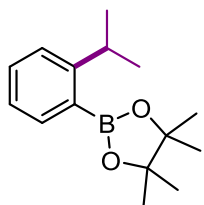

**2-isopropylphenylboronic acid pinacol ester (6m):** Prepared, following the Negishi cross-coupling procedure B using isopropylzinc chloride (0.8 mmol). Slow addition was performed over 3 minutes. The title product was obtained after purification by column chromatography (100:1 → 50:1 → 30:1 Hexane/EtOAc) as a light yellow oil. 72 mg (74%).  $R_f = 0.44$  (20:1 Hexane/EtOAc).  $^1\text{H NMR}$  (600 MHz,  $\text{CDCl}_3$ )  $\delta$  7.75 (d,  $J = 7.4$  Hz, 1H), 7.42 – 7.36 (m, 1H), 7.33 (d,  $J = 7.7$  Hz, 1H), 7.20 – 7.15 (m, 1H), 3.69 (hept,  $J = 6.9$  Hz, 1H), 1.36 (s, 12H), 1.24 (d,  $J = 6.9$  Hz, 6H).  $^{13}\text{C NMR}$  (151 MHz,  $\text{CDCl}_3$ )  $\delta$  155.4, 135.7, 130.9, 124.8, 124.4, 83.3, 31.5, 24.8, 24.4. MS (70eV, EI):  $m/z$  (%): 246 (20) [ $\text{M}^+$ ], 231 (12), 189 (55), 145 (64), 131 (87), 101 (60), 84 (100). These data are in agreement with those reported previously in the literature.<sup>[15]</sup> 97% branched, 3% linear. The carbon adjacent to boron was not detected.

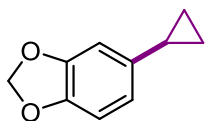

**5-cyclopropylbenzo[d][1,3]dioxole (6n):** Prepared, following the Kumada cross-coupling procedure using cyclopropylmagnesium chloride (0.8 mmol). The title product was obtained after purification by column chromatography (15:1 Hexane/EtOAc) as a yellow oil. 49 mg (75%).  $R_f = 0.49$  (15:1 Hexane/EtOAc).  $^1\text{H NMR}$  (600 MHz,  $\text{CDCl}_3$ )  $\delta$  6.71 (d,  $J = 8.0$  Hz, 1H), 6.60 (dd,  $J = 8.0, 1.7$  Hz, 1H), 6.56 (d,  $J = 1.8$  Hz, 1H), 5.91 (s, 2H), 1.85 (tt,  $J = 8.4, 5.1$  Hz, 1H), 0.96 – 0.84 (m, 2H), 0.66 – 0.56 (m, 2H).  $^{13}\text{C NMR}$  (151 MHz,  $\text{CDCl}_3$ )  $\delta$  147.6, 145.3, 137.8, 119.0, 108.0, 106.2, 100.7, 15.2, 8.7. MS (70eV, EI):  $m/z$  (%): 162 (100) [ $\text{M}^+$ ], 135 (23), 131 (50), 104 (54) 103 (44), 91 (10), 78 (21) 77 (29). These data are in agreement with those reported previously in the literature.<sup>[16]</sup>

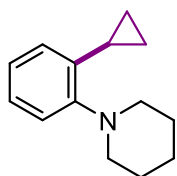

**1-(2-cyclopropylphenyl)piperidine (6o):** Prepared, following the Kumada cross-coupling procedure using cyclopropylmagnesium chloride (0.8 mmol). The title product was obtained after purification by column chromatography (20:1 Hexane/EtOAc) as a yellow oil. 69 mg (86%).  $R_f = 0.57$  (20:1 Hexane/EtOAc).  $^1\text{H NMR}$  (600 MHz,  $\text{CDCl}_3$ )  $\delta$  7.16 – 7.12 (m, 1H), 7.04 (d,  $J = 8.0$  Hz, 1H), 7.01 – 6.96 (m, 1H), 6.78 (d,  $J = 7.7$  Hz, 1H), 3.00 (br, 4H), 2.36 (tt,  $J = 8.5, 5.4$  Hz, 1H), 1.79 – 1.74 (m, 4H), 1.62 (br, 2H), 1.08 – 0.96 (m, 2H), 0.79 – 0.68 (m, 2H).  $^{13}\text{C NMR}$  (151 MHz,  $\text{CDCl}_3$ )  $\delta$  153.1, 137.6, 125.6, 123.0, 122.7, 118.5, 53.6, 26.6, 24.4, 10.6, 9.4. MS (70eV, EI):  $m/z$  (%): 200 (100) [ $\text{M}^+$ ], 186 (10), 172 (43), 158 (14), 144 (45), 130 (38), 117 (42). HRMS (ESI) calculated for  $\text{C}_{14}\text{H}_{19}\text{N}$ : 202.1590 [ $\text{M}+\text{H}$ ] $^+$ , found: 202.1587.

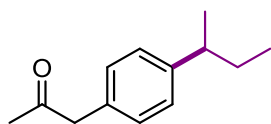

**1-(4-(*sec*-butyl)phenyl)propan-2-one (6p):** Prepared, following the Negishi cross-coupling procedure A using *sec*-butylzinc chloride (0.8 mmol). The title product was obtained after purification by column chromatography (20:1 → 5:1 Pentane/EtOAc) as a colorless oil. 61 mg (80%).  $R_f = 0.45$  (5:1 Pentane/EtOAc).  $^1\text{H NMR}$  (600 MHz,  $\text{CDCl}_3$ )  $\delta$  7.16 – 7.10 (m, 4H), 3.66 (s, 2H), 2.58 (h,  $J = 7.0$  Hz, 1H), 2.15 (s, 3H), 1.62 – 1.54 (m, 2H), 1.23 (d,  $J = 7.0$  Hz, 3H), 0.82 (t,  $J = 7.4$  Hz, 3H).  $^{13}\text{C NMR}$  (151 MHz,  $\text{CDCl}_3$ )  $\delta$  206.8, 146.5, 131.5, 129.2, 127.4, 50.7, 41.3, 31.1, 29.2, 21.7, 12.2. MS (70eV, EI):  $m/z$  (%): 190 (30) [ $\text{M}^+$ ], 161 (38), 147 (100), 11 (44), 105 (23), 91 (40). HRMS (EI) calculated for  $\text{C}_{13}\text{H}_{18}\text{O}$ : 190.1352 [ $\text{M}^+$ ], found: 190.1351. No isomeric products were detected by  $^1\text{H NMR}$  spectroscopy.

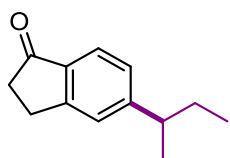

**5-(*sec*-butyl)-2,3-dihydro-1H-inden-1-one (6q):** The title product was obtained after purification by column chromatography (20:1 → 5:1 Pentane/EtOAc) as a colorless oil. 64 mg (86%).  $R_f = 0.47$  (5:1 Pentane/EtOAc).  $^1\text{H NMR}$  (600 MHz,  $\text{CDCl}_3$ )  $\delta$  7.69 (d,  $J = 7.9$  Hz, 1H), 7.28 (s, 1H), 7.20 (d,  $J = 7.9$  Hz, 1H), 3.15 – 3.09 (m, 2H), 2.72 – 2.65 (m, 3H), 1.63 (p,  $J = 7.4$  Hz, 2H), 1.27 (d,  $J = 6.9$  Hz, 3H), 0.83 (t,  $J = 7.4$  Hz, 3H).  $^{13}\text{C NMR}$  (151 MHz,  $\text{CDCl}_3$ )  $\delta$  206.7, 155.7, 155.5, 135.3, 126.7, 125.0, 123.6, 42.2, 36.4, 31.0, 25.8, 21.7, 12.2. MS (70eV, EI):  $m/z$  (%): 188 (32) [ $\text{M}^+$ ], 159 (100), 117 (35), 115 (16), 91 (11). HRMS (ESI) calculated for  $\text{C}_{13}\text{H}_{17}\text{O}$ : 189.1274 [ $\text{M}+\text{H}$ ] $^+$ , found: 189.1275. No isomeric products were detected by  $^1\text{H NMR}$  spectroscopy.

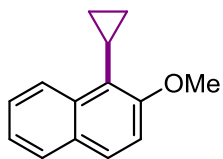

**1-cyclopropyl-2-methoxynaphthalene (6r):** Prepared, following the Kumada cross-coupling procedure using cyclopropylmagnesium chloride (0.8 mmol). The title product was obtained after purification by column chromatography (20:1 Hexane/EtOAc) as a pale yellow oil. 70 mg (89%).  $R_f = 0.45$  (20:1 Hexane/EtOAc).  $^1\text{H NMR}$  (400 MHz,  $\text{CDCl}_3$ )  $\delta$  8.51 (d,  $J = 8.6$  Hz, 1H), 7.82 (d,  $J = 8.1$  Hz, 1H), 7.78 (d,  $J = 9.0$  Hz, 1H), 7.58 – 7.52 (m, 1H), 7.44 – 7.36 (m, 1H), 7.28 (d,  $J = 9.0$  Hz, 1H), 4.00 (s, 3H), 2.00 (tt,  $J = 8.4, 5.6$  Hz, 1H), 1.26 – 1.19 (m, 2H), 0.86 – 0.79 (m, 2H).  $^{13}\text{C NMR}$  (101 MHz,  $\text{CDCl}_3$ )  $\delta$  156.3, 135.0, 129.1, 128.2, 128.1, 125.9, 124.7, 123.5, 123.3, 114.4, 56.8, 7.8. MS (70eV, EI):  $m/z$  (%): 198 (100) [ $\text{M}^+$ ], 183 (60), 167 (72), 165 (62), 153 (35), 141 (21), 139 (22), 128 (19), 115 (22). HRMS (EI) calculated for  $\text{C}_{14}\text{H}_{14}\text{O}$ : 198.1039 [ $\text{M}$ ] $^+$ , found: 198.1044.

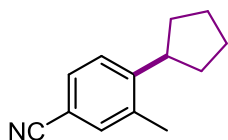

**4-cyclopentyl-3-methylbenzonitrile (6s):** Prepared, following the Negishi cross-coupling procedure A using cyclopentylzinc chloride (0.8 mmol). The title product was obtained after purification by column chromatography (50:1  $\rightarrow$  20:1 Hexane/EtOAc) as a light yellow oil. 67 mg (91%).  $R_f = 0.42$  (10:1 Hexane/EtOAc).  $^1\text{H NMR}$  (600 MHz,  $\text{CDCl}_3$ )  $\delta$  7.43 (d,  $J = 8.0$  Hz, 1H), 7.40 (s, 1H), 7.31 (d,  $J = 8.0$  Hz, 1H), 3.20 (p,  $J = 8.3$  Hz, 1H), 2.36 (s, 3H), 2.08 – 2.01 (m, 2H), 1.87 – 1.79 (m, 2H), 1.77 – 1.67 (m, 2H), 1.59 – 1.51 (m, 2H).  $^{13}\text{C NMR}$  (151 MHz,  $\text{CDCl}_3$ )  $\delta$  150.6, 137.2, 133.3, 129.9, 126.0, 119.3, 109.0, 41.7, 33.5, 25.6, 19.6. MS (70eV, EI):  $m/z$  (%): 185 (58) [ $\text{M}^+$ ], 170 (34), 156 (47), 143 (100), 116 (26). HRMS (ESI) calculated for  $\text{C}_{13}\text{H}_{15}\text{NNa}$ : 208.1097 [ $\text{M}+\text{Na}$ ] $^+$ , found: 208.1096. These data are in agreement with those reported previously in the literature.<sup>[17]</sup>

## 5. Computational details

DFT calculations were performed using Gaussian 09, Revision E.01.<sup>[18]</sup> Geometry optimization was conducted in the gas-phase at the  $\omega$ B97XD/6-31G(d) level of theory employing LANL2DZ as an ECP for Pd. Frequencies were calculated at the same level of theory and used to verify the nature of all stationary points as either minima (no imaginary frequencies) or transition states (one imaginary frequency). Additionally, transition states were confirmed by following the intrinsic reaction coordinate (IRC) to their corresponding intermediates. Single point energies were calculated at the M06L/def2-TZVP level of theory employing the CPCM solvation model for toluene. Images were created using the CYLview software.<sup>[19]</sup>

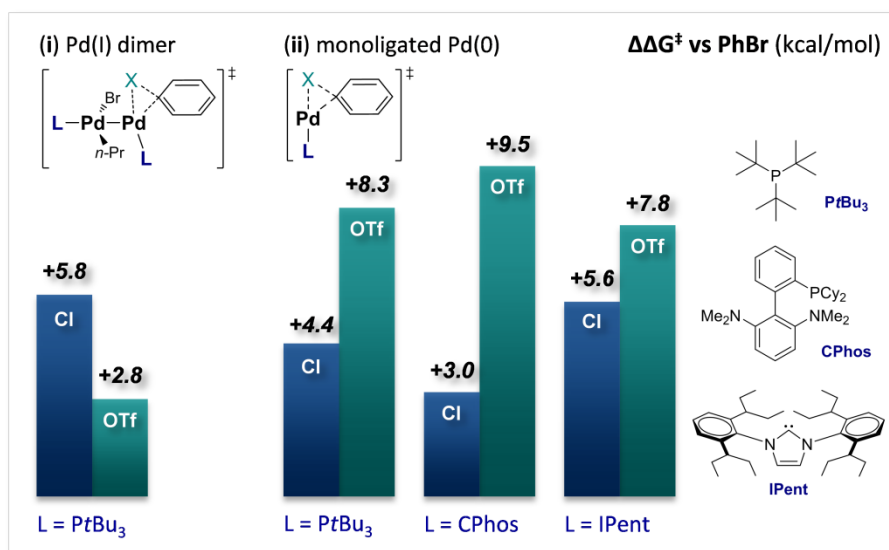

**Figure S1.** Comparison of oxidative addition selectivities of C-Br vs C-Cl vs C-OTf using (i) dinuclear Pd(I), (ii) monoligated Pd(0) with L = PtBu<sub>3</sub>, CPhos, IPent. Energies (in kcal/mol) refer to Gibbs free energies calculated at the CPCM (Toluene) M06L/def2-TZVP// $\omega$ B97XD/6-31G(d) (LANL2DZ) level of theory.

## XYZ Coordinates and Energies of Optimized Structures

PhBr

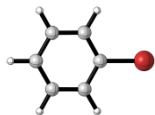

|    |              |              |              |
|----|--------------|--------------|--------------|
| C  | 2.869477000  | 0.000023000  | -0.000009000 |
| C  | 2.171152000  | 1.204598000  | 0.000017000  |
| C  | 0.778897000  | 1.211833000  | 0.000004000  |
| C  | 0.096483000  | -0.000083000 | 0.000008000  |
| C  | 0.778930000  | -1.211853000 | 0.000014000  |
| C  | 2.171289000  | -1.204520000 | -0.000012000 |
| H  | 3.954756000  | 0.000120000  | -0.000027000 |
| H  | 2.708267000  | 2.147725000  | -0.000018000 |
| H  | 0.229552000  | 2.146508000  | -0.000020000 |
| H  | 0.229773000  | -2.146638000 | 0.000033000  |
| H  | 2.708358000  | -2.147672000 | -0.000009000 |
| Br | -1.800802000 | -0.000001000 | -0.000003000 |

Zero-point correction = 0.092047 (Hartree/Particle)  
 Thermal correction to Energy = 0.097674  
 Thermal correction to Enthalpy = 0.098618  
 Thermal correction to Gibbs Free Energy = 0.061229  
 Sum of electronic and zero-point Energies = -2802.899624  
 Sum of electronic and thermal Energies = -2802.893996  
 Sum of electronic and thermal Enthalpies = -2802.893052  
 Sum of electronic and thermal Free Energies = -2802.930442  
 E(RM06L) = -2805.75793481

PhCl

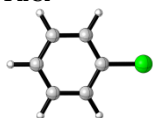

|    |              |              |              |
|----|--------------|--------------|--------------|
| C  | 2.266929000  | 0.000015000  | -0.000001000 |
| C  | 1.568426000  | 1.204625000  | -0.000002000 |
| C  | 0.176153000  | 1.212590000  | 0.000007000  |
| C  | -0.505228000 | -0.000074000 | -0.000011000 |
| C  | 0.176172000  | -1.212604000 | -0.000009000 |
| C  | 1.568545000  | -1.204556000 | 0.000007000  |
| H  | 3.352403000  | 0.000103000  | -0.000005000 |
| H  | 2.106043000  | 2.147752000  | -0.000006000 |
| H  | -0.375513000 | 2.146386000  | 0.000003000  |
| H  | -0.375323000 | -2.146502000 | 0.000000000  |
| H  | 2.106107000  | -2.147713000 | 0.000020000  |
| Cl | -2.254100000 | 0.000000000  | 0.000002000  |

Zero-point correction = 0.092364 (Hartree/Particle)  
 Thermal correction to Energy = 0.097805  
 Thermal correction to Enthalpy = 0.098749  
 Thermal correction to Gibbs Free Energy = 0.062620  
 Sum of electronic and zero-point Energies = -691.647478  
 Sum of electronic and thermal Energies = -691.642037  
 Sum of electronic and thermal Enthalpies = -691.641093  
 Sum of electronic and thermal Free Energies = -691.677222  
 E(RM06L) = -691.903788935

PhOTf

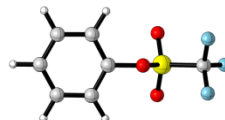

|   |              |              |              |
|---|--------------|--------------|--------------|
| C | 4.179610000  | 0.001132000  | 0.008259000  |
| C | 3.494323000  | -1.207736000 | -0.091276000 |
| C | 2.117588000  | -1.218326000 | -0.296241000 |
| C | 1.458277000  | -0.002394000 | -0.399766000 |
| C | 2.115010000  | 1.215279000  | -0.299859000 |
| C | 3.491714000  | 1.208239000  | -0.094637000 |
| H | 5.253307000  | 0.002539000  | 0.167616000  |
| H | 4.029439000  | -2.148147000 | -0.007611000 |
| H | 1.557719000  | -2.143472000 | -0.373424000 |
| H | 1.553269000  | 2.139042000  | -0.379853000 |
| H | 4.024796000  | 2.150028000  | -0.013540000 |
| O | 0.075428000  | -0.004491000 | -0.664713000 |
| S | -0.897555000 | 0.002355000  | 0.631279000  |
| O | -0.806067000 | -1.254113000 | 1.334794000  |
| O | -0.804934000 | 1.265707000  | 1.322305000  |
| C | -2.451360000 | -0.001478000 | -0.375820000 |
| F | -3.469556000 | 0.009271000  | 0.472400000  |
| F | -2.495389000 | 1.075255000  | -1.142383000 |
| F | -2.502171000 | -1.091503000 | -1.122984000 |

Zero-point correction = 0.121707 (Hartree/Particle)  
 Thermal correction to Energy = 0.133899  
 Thermal correction to Enthalpy = 0.134843  
 Thermal correction to Gibbs Free Energy = 0.080344  
 Sum of electronic and zero-point Energies = -1192.663568  
 Sum of electronic and thermal Energies = -1192.651375  
 Sum of electronic and thermal Enthalpies = -1192.650431  
 Sum of electronic and thermal Free Energies = -1192.704930  
 E(RM06L) = -1193.34216543

TS\_OA\_[Pd(I)(μ-Br)(μ-*n*Pr)PrBu<sub>3</sub>]<sub>2</sub>-PhBr

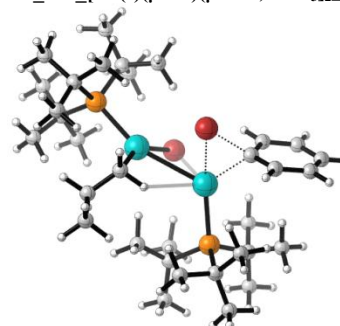

|    |              |              |              |
|----|--------------|--------------|--------------|
| C  | -4.100307000 | -4.205772000 | -0.046687000 |
| C  | -3.021372000 | -2.787719000 | 1.590211000  |
| C  | -2.011829000 | -2.516702000 | 0.661595000  |
| C  | -1.987689000 | -3.149624000 | -0.586311000 |
| H  | -1.166147000 | -2.968794000 | -1.271955000 |
| H  | -2.986044000 | -2.343796000 | 2.577628000  |
| C  | -3.059393000 | -3.966357000 | -0.940751000 |
| C  | -4.070400000 | -3.621648000 | 1.219587000  |
| H  | -3.066757000 | -4.427882000 | -1.923902000 |
| H  | -4.868343000 | -3.816460000 | 1.930663000  |
| Pd | -1.473104000 | -0.482088000 | 0.277234000  |
| Pd | 1.419126000  | 0.283070000  | 0.042811000  |
| Br | -0.081727000 | -2.144729000 | 1.575302000  |

|   |              |              |              |
|---|--------------|--------------|--------------|
| H | -4.921894000 | -4.857145000 | -0.327922000 |
| H | -3.549748000 | 2.705002000  | 3.258826000  |
| C | -3.118387000 | 2.573296000  | 2.258477000  |
| C | -4.054991000 | 1.667455000  | 1.437052000  |
| H | -2.134902000 | 2.106758000  | 2.382581000  |
| H | -2.986235000 | 3.568764000  | 1.830360000  |
| P | -3.178151000 | 1.151671000  | -0.192492000 |
| C | -5.416575000 | 2.364726000  | 1.289266000  |
| C | -4.233153000 | 0.406503000  | 2.307699000  |
| C | -2.473847000 | 2.739912000  | -1.008745000 |
| C | -4.491235000 | 0.415805000  | -1.380261000 |
| H | -6.176479000 | 1.695945000  | 0.877689000  |
| H | -5.767630000 | 2.676751000  | 2.281795000  |
| H | -5.372432000 | 3.257685000  | 0.661753000  |
| H | -4.840543000 | -0.369909000 | 1.843070000  |
| H | -3.257724000 | -0.029694000 | 2.541961000  |
| H | -4.719741000 | 0.694224000  | 3.249275000  |
| C | -3.374660000 | 3.984171000  | -0.948347000 |
| C | -1.124928000 | 3.048947000  | -0.331329000 |
| C | -2.122396000 | 2.473404000  | -2.484225000 |
| C | -3.754186000 | -0.350479000 | -2.499008000 |
| C | -5.313984000 | -0.646797000 | -0.630146000 |
| C | -5.462176000 | 1.422760000  | -2.017205000 |
| H | -4.353424000 | 3.811686000  | -1.402774000 |
| H | -3.531388000 | 4.347980000  | 0.069672000  |
| H | -2.891691000 | 4.796104000  | -1.507632000 |
| H | -0.414435000 | 2.235154000  | -0.517224000 |
| H | -0.704572000 | 3.963820000  | -0.770477000 |
| H | -1.194464000 | 3.201764000  | 0.745599000  |
| H | -1.539305000 | 3.327135000  | -2.853388000 |
| H | -1.501238000 | 1.580393000  | -2.597564000 |
| H | -3.003079000 | 2.389338000  | -3.124466000 |
| H | -3.150942000 | 0.287067000  | -3.143175000 |
| H | -3.097619000 | -1.120152000 | -2.085181000 |
| H | -4.503733000 | -0.846148000 | -3.130002000 |
| H | -6.004972000 | -0.217313000 | 0.099663000  |
| H | -5.919616000 | -1.197098000 | -1.361031000 |
| H | -4.670818000 | -1.374199000 | -0.128065000 |
| H | -6.202948000 | 0.870562000  | -2.610181000 |
| H | -6.008726000 | 2.011689000  | -1.276924000 |
| H | -4.960096000 | 2.113283000  | -2.698537000 |
| P | 3.772079000  | 0.076750000  | -0.094172000 |
| C | 4.476455000  | 1.480053000  | -1.190994000 |
| C | 4.807009000  | -0.015630000 | 1.530597000  |
| C | 4.041264000  | -1.609084000 | -1.020372000 |
| C | 5.830603000  | 1.169374000  | -1.853094000 |
| C | 3.433779000  | 1.805530000  | -2.279130000 |
| C | 4.647990000  | 2.770420000  | -0.371663000 |
| C | 4.500246000  | 1.142297000  | 2.500462000  |
| C | 4.403714000  | -1.294473000 | 2.290274000  |
| C | 6.334546000  | 0.013826000  | 1.322596000  |
| C | 3.723068000  | -1.498234000 | -2.524094000 |
| C | 5.462380000  | -2.193126000 | -0.915549000 |
| C | 3.036641000  | -2.635962000 | -0.455739000 |
| H | 6.609020000  | 0.926992000  | -1.127163000 |
| H | 5.773917000  | 0.355917000  | -2.576560000 |
| H | 6.160005000  | 2.062377000  | -2.399031000 |
| H | 2.507339000  | 2.182144000  | -1.834091000 |
| H | 3.844520000  | 2.588388000  | -2.929785000 |
| H | 3.165754000  | 0.955088000  | -2.904187000 |
| H | 4.855978000  | 3.591251000  | -1.068829000 |
| H | 3.738368000  | 3.029568000  | 0.175402000  |
| H | 5.487813000  | 2.722210000  | 0.325672000  |
| H | 4.653502000  | 2.128768000  | 2.067792000  |
| H | 3.490796000  | 1.086639000  | 2.900344000  |
| H | 5.189603000  | 1.052475000  | 3.349263000  |
| H | 4.760920000  | -2.210045000 | 1.817373000  |
| H | 4.844520000  | -1.255145000 | 3.293861000  |
| H | 3.316506000  | -1.364340000 | 2.406816000  |
| H | 6.815609000  | -0.224219000 | 2.279651000  |

|    |              |              |              |
|----|--------------|--------------|--------------|
| H  | 6.702758000  | -0.697909000 | 0.587529000  |
| H  | 6.676738000  | 1.012119000  | 1.034818000  |
| H  | 2.722737000  | -1.106075000 | -2.706455000 |
| H  | 4.454328000  | -0.909719000 | -3.080680000 |
| H  | 3.748666000  | -2.513353000 | -2.938938000 |
| H  | 5.738322000  | -2.487957000 | 0.098308000  |
| H  | 5.492942000  | -3.102452000 | -1.528017000 |
| H  | 6.226793000  | -1.516828000 | -1.307336000 |
| H  | 3.235058000  | -3.605671000 | -0.929631000 |
| H  | 3.106352000  | -2.776795000 | 0.623089000  |
| H  | 2.008649000  | -2.353961000 | -0.694747000 |
| Br | 0.333144000  | -0.469813000 | -2.209975000 |
| C  | 1.240508000  | 1.232425000  | 1.819564000  |
| H  | 1.679925000  | 0.680851000  | 2.654979000  |
| H  | 0.148749000  | 1.077776000  | 1.866706000  |
| C  | 1.558839000  | 2.716531000  | 1.850906000  |
| H  | 1.227227000  | 3.194784000  | 0.922445000  |
| H  | 2.635845000  | 2.882419000  | 1.918621000  |
| C  | 0.879305000  | 3.402757000  | 3.042990000  |
| H  | 1.115014000  | 4.472274000  | 3.069743000  |
| H  | -0.210126000 | 3.298079000  | -2.989608000 |
| H  | 1.208993000  | 2.957832000  | 3.988963000  |

Zero-point correction = 0.945086 (Hartree/Particle)  
 Thermal correction to Energy = 0.999034  
 Thermal correction to Enthalpy = 0.999979  
 Thermal correction to Gibbs Free Energy = 0.859422  
 Sum of electronic and zero-point Energies = -7375.076649  
 Sum of electronic and thermal Energies = -7375.022701  
 Sum of electronic and thermal Enthalpies = -7375.021757  
 Sum of electronic and thermal Free Energies = -7375.162314  
 E(RM06L) = -7384.53236620

#### TS\_OA\_[Pd(I)(μ-Br)(μ-*n*Pr)PrBu<sub>3</sub>]<sub>2</sub>\_PhCl

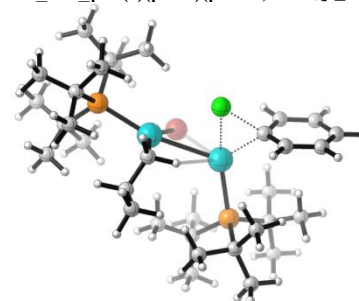

|    |              |              |              |
|----|--------------|--------------|--------------|
| C  | 4.643632000  | 3.949571000  | 0.724644000  |
| C  | 3.038947000  | 2.578786000  | 1.912965000  |
| C  | 2.273127000  | 2.492140000  | 0.745687000  |
| C  | 2.634057000  | 3.206563000  | -0.402245000 |
| H  | 1.980302000  | 3.206763000  | -1.268875000 |
| H  | 2.703134000  | 2.089595000  | 2.819315000  |
| C  | 3.840611000  | 3.904828000  | -0.411202000 |
| C  | 4.229016000  | 3.294928000  | 1.886509000  |
| H  | 4.138928000  | 4.430553000  | -1.313742000 |
| H  | 4.837295000  | 3.342504000  | 2.785617000  |
| Pd | 1.461810000  | 0.660209000  | 0.042598000  |
| Pd | -1.403584000 | 0.010781000  | 0.139335000  |
| Cl | 0.233511000  | 2.490685000  | 1.107902000  |
| H  | 5.574545000  | 4.507666000  | 0.715443000  |
| H  | 2.684574000  | -2.911324000 | 3.138096000  |
| C  | 2.467444000  | -2.715425000 | 2.080426000  |
| C  | 3.600779000  | -1.856116000 | 1.494519000  |
| H  | 1.511869000  | -2.184787000 | 2.033114000  |
| H  | 2.358927000  | -3.684303000 | 1.589468000  |
| P  | 3.039639000  | -1.149286000 | -0.200110000 |
| C  | 4.897160000  | -2.681627000 | 1.497977000  |
| C  | 3.748786000  | -0.682664000 | 2.482235000  |



|   |              |              |              |
|---|--------------|--------------|--------------|
| C | 2.325624000  | -2.610147000 | -1.228909000 |
| C | 4.593731000  | -0.497736000 | -1.119393000 |
| H | 5.777000000  | -2.071857000 | 1.278644000  |
| H | 5.043547000  | -3.108962000 | 2.498751000  |
| H | 4.872961000  | -3.510914000 | 0.787955000  |
| H | 4.470940000  | 0.071169000  | 2.171009000  |
| H | 2.784827000  | -0.183781000 | 2.617234000  |
| H | 4.072254000  | -1.079275000 | 3.453918000  |
| C | 3.118057000  | -3.926436000 | -1.157979000 |
| C | 0.878806000  | -2.887352000 | -0.771600000 |
| C | 2.215060000  | -2.193846000 | -2.707992000 |
| C | 4.130385000  | 0.411657000  | -2.277589000 |
| C | 5.390505000  | 0.414279000  | -0.169415000 |
| C | 5.549834000  | -1.561476000 | -1.683625000 |
| H | 4.164885000  | -3.805749000 | -1.444460000 |
| H | 3.087062000  | -4.383692000 | -0.165933000 |
| H | 2.667591000  | -4.644411000 | -1.855724000 |
| H | 0.266349000  | -1.980967000 | -0.819024000 |
| H | 0.431929000  | -3.622709000 | -1.453405000 |
| H | 0.818942000  | -3.303096000 | 0.233866000  |
| H | 1.636092000  | -2.961372000 | -3.236822000 |
| H | 1.680530000  | -1.246972000 | -2.823953000 |
| H | 3.186108000  | -2.130959000 | -3.203331000 |
| H | 3.592160000  | -0.119340000 | -3.061163000 |
| H | 3.487479000  | 1.217235000  | -1.915774000 |
| H | 5.017992000  | 0.867498000  | -2.735627000 |
| H | 5.906057000  | -0.138381000 | 0.619781000  |
| H | 6.159214000  | 0.937306000  | -0.751689000 |
| H | 4.755578000  | 1.176071000  | 0.288119000  |
| H | 6.425797000  | -1.054506000 | -2.108827000 |
| H | 5.912285000  | -2.255819000 | -0.922101000 |
| H | 5.096640000  | -2.143846000 | -2.489332000 |
| P | -3.765603000 | -0.008845000 | -0.006019000 |
| C | -4.319895000 | -1.531333000 | -1.029956000 |
| C | -4.836635000 | 0.065437000  | 1.600680000  |
| C | -4.168106000 | 1.595975000  | -1.017213000 |
| C | -5.691986000 | -1.388527000 | -1.712269000 |
| C | -3.249500000 | -1.817257000 | -2.101445000 |
| C | -4.364063000 | -2.783186000 | -0.136530000 |
| C | -4.456706000 | -1.010360000 | 2.640585000  |
| C | -4.579166000 | 1.415409000  | 2.299045000  |
| C | -6.349723000 | -0.116593000 | 1.362129000  |
| C | -3.820238000 | 1.437214000  | -2.509470000 |
| C | -5.635024000 | 2.060176000  | -0.960768000 |
| C | -3.257293000 | 2.727156000  | -0.491780000 |
| H | -6.499250000 | -1.188721000 | -1.005730000 |
| H | -5.705086000 | -0.609378000 | -2.475363000 |
| H | -5.925540000 | -2.335048000 | -2.215927000 |
| H | -2.286154000 | -2.059312000 | -1.642740000 |
| H | -3.575972000 | -2.684356000 | -2.690207000 |
| H | -3.079802000 | -0.990385000 | -2.789031000 |
| H | -4.476184000 | -3.661604000 | -0.783614000 |
| H | -3.436300000 | -2.911930000 | 0.429007000  |
| H | -5.211765000 | -2.783453000 | 0.552674000  |
| H | -4.473869000 | -2.026055000 | 2.251523000  |
| H | -3.485524000 | -0.828902000 | 3.093198000  |
| H | -5.199551000 | -0.961563000 | 3.446495000  |
| H | -5.012840000 | 2.266505000  | 1.772597000  |
| H | -5.039338000 | 1.382535000  | 3.294219000  |
| H | -3.508854000 | 1.602390000  | 2.434785000  |
| H | -6.875517000 | 0.138539000  | 2.290840000  |
| H | -6.760632000 | 0.508886000  | 0.573134000  |
| H | -6.592099000 | -1.159009000 | 1.135927000  |
| H | -2.788736000 | 1.121163000  | -2.663325000 |
| H | -4.493187000 | 0.761761000  | -3.040866000 |
| H | -3.925277000 | 2.424463000  | -2.976020000 |
| H | -5.957626000 | 2.374078000  | 0.033251000  |
| H | -5.731692000 | 2.934583000  | -1.615534000 |
| H | -6.329587000 | 1.302426000  | -1.333605000 |
| H | -3.537401000 | 3.659078000  | -0.998853000 |

|    |              |              |              |
|----|--------------|--------------|--------------|
| H  | -3.340293000 | 2.898234000  | 0.581989000  |
| H  | -2.207823000 | 2.526595000  | -0.723129000 |
| Br | -0.370817000 | 0.559069000  | -2.215638000 |
| C  | -1.223795000 | -0.539813000 | 2.070594000  |
| H  | -1.856837000 | 0.036689000  | 2.748943000  |
| H  | -0.192399000 | -0.173966000 | 2.192942000  |
| C  | -1.280398000 | -2.035853000 | 2.321487000  |
| H  | -0.613393000 | -2.549549000 | 1.621965000  |
| H  | -2.280211000 | -2.433835000 | 2.133406000  |
| C  | -0.872765000 | -2.373673000 | 3.761464000  |
| H  | -0.850791000 | -3.457023000 | 3.922703000  |
| H  | 0.122264000  | -1.976451000 | 3.991549000  |
| H  | -1.578140000 | -1.937550000 | 4.478842000  |

Zero-point correction = 0.947476 (Hartree/Particle)  
Thermal correction to Energy = 1.000445  
Thermal correction to Enthalpy = 1.001389  
Thermal correction to Gibbs Free Energy = 0.865141  
Sum of electronic and zero-point Energies = -5263.809301  
Sum of electronic and thermal Energies = -5263.756332  
Sum of electronic and thermal Enthalpies = -5263.755388  
Sum of electronic and thermal Free Energies = -5263.891636  
E(RM06L) = -5270.67331979

### TS\_OA\_[Pd(I)(μ-Br)(μ-*n*-Pr)PzBu<sub>3</sub>]<sub>2</sub>\_PhOTf

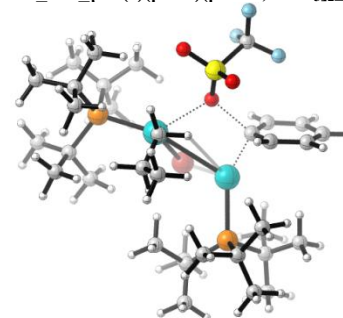

|    |              |              |              |
|----|--------------|--------------|--------------|
| C  | 3.285300000  | 4.172378000  | -0.582183000 |
| C  | 2.008314000  | 2.584086000  | 0.727805000  |
| C  | 1.305114000  | 2.282954000  | -0.444868000 |
| C  | 1.458408000  | 2.970932000  | -1.651732000 |
| H  | 0.845837000  | 2.718027000  | -2.508756000 |
| H  | 1.648569000  | 2.262831000  | 1.699771000  |
| C  | 2.490727000  | 3.890620000  | -1.710576000 |
| C  | 3.039839000  | 3.543025000  | 0.623753000  |
| H  | 2.699317000  | 4.390011000  | -2.652588000 |
| H  | 3.590954000  | 3.824764000  | 1.516332000  |
| Pd | 1.805678000  | 0.404552000  | -0.256605000 |
| Pd | -1.386909000 | -0.273722000 | 0.061617000  |
| O  | -0.726338000 | 2.143131000  | -0.050256000 |
| H  | 4.070855000  | 4.917723000  | -0.655308000 |
| H  | 3.354785000  | -1.969849000 | 3.880151000  |
| C  | 3.124863000  | -2.152923000 | 2.823083000  |
| C  | 4.105891000  | -1.337357000 | 1.961695000  |
| H  | 2.090460000  | -1.840550000 | 2.656620000  |
| H  | 3.198865000  | -3.229691000 | 2.659228000  |
| P  | 3.508977000  | -1.315862000 | 0.139821000  |
| C  | 5.522391000  | -1.888349000 | 2.192679000  |
| C  | 4.020682000  | 0.098552000  | 2.521070000  |
| C  | 3.041780000  | -3.103642000 | -0.359071000 |
| C  | 4.961210000  | -0.721135000 | -0.964188000 |
| H  | 6.295314000  | -1.248509000 | 1.760877000  |
| H  | 5.712833000  | -1.938683000 | 3.272588000  |
| H  | 5.650401000  | -2.895882000 | 1.789753000  |
| H  | 4.596557000  | 0.831823000  | 1.957352000  |
| H  | 2.981605000  | 0.440450000  | 2.544519000  |
| H  | 4.397441000  | 0.096806000  | 3.552071000  |
| C  | 4.006506000  | -4.208755000 | 0.098672000  |

|   |              |              |              |
|---|--------------|--------------|--------------|
| C | 1.63198000   | -3.388556000 | 0.200273000  |
| C | 2.901198000  | -3.189285000 | -1.890837000 |
| C | 4.385469000  | -0.280260000 | -2.328789000 |
| C | 5.579768000  | 0.555452000  | -0.361823000 |
| C | 6.081835000  | -1.745837000 | -1.200965000 |
| H | 5.023339000  | -4.056309000 | -0.271864000 |
| H | 4.051803000  | -4.306922000 | 1.185762000  |
| H | 3.653471000  | -5.170310000 | -0.295914000 |
| H | 0.934717000  | -2.596994000 | -0.090935000 |
| H | 1.266278000  | -4.331988000 | -0.225009000 |
| H | 1.608808000  | -3.494039000 | 1.285320000  |
| H | 2.468564000  | -4.166310000 | -2.140169000 |
| H | 2.223833000  | -2.423172000 | -2.278241000 |
| H | 3.859794000  | -3.124235000 | -2.409996000 |
| H | 3.880684000  | -1.076470000 | -2.874108000 |
| H | 3.673505000  | 0.543822000  | -2.210617000 |
| H | 5.213476000  | 0.078041000  | -2.954292000 |
| H | 6.142033000  | 0.372067000  | 0.556340000  |
| H | 6.284457000  | 0.972165000  | -1.092262000 |
| H | 4.820859000  | 1.321765000  | -0.168547000 |
| H | 6.884908000  | -1.267748000 | -1.776617000 |
| H | 6.520439000  | -2.115080000 | -0.271015000 |
| H | 5.741011000  | -2.606038000 | -1.782226000 |
| P | -3.458292000 | -1.345570000 | -0.109144000 |
| C | -3.266270000 | -3.216786000 | -0.482903000 |
| C | -4.776360000 | -1.132816000 | 1.275609000  |
| C | -4.135933000 | -0.473498000 | -1.700535000 |
| C | -4.438865000 | -3.846285000 | -1.255449000 |
| C | -1.967058000 | -3.432461000 | -1.281433000 |
| C | -3.083766000 | -4.004453000 | 0.826566000  |
| C | -4.228472000 | -1.521514000 | 2.664485000  |
| C | -5.142803000 | 0.359946000  | 1.379894000  |
| C | -6.057361000 | -1.964700000 | 1.070107000  |
| C | -3.408773000 | -0.968992000 | -2.965677000 |
| C | -5.644245000 | -0.654912000 | -1.946370000 |
| C | -3.825076000 | 1.037262000  | -1.604092000 |
| H | -5.397442000 | -3.726387000 | -0.747467000 |
| H | -4.536273000 | -3.449099000 | -2.267044000 |
| H | -4.251350000 | -4.923393000 | -1.350405000 |
| H | -1.097191000 | -3.104773000 | -0.708084000 |
| H | -1.859429000 | -4.506012000 | -1.483851000 |
| H | -1.942208000 | -2.910160000 | -2.236490000 |
| H | -2.784322000 | -5.028371000 | 0.571420000  |
| H | -2.291346000 | -3.579837000 | 1.449687000  |
| H | -4.002939000 | -4.076632000 | 1.412012000  |
| H | -3.844936000 | -2.538691000 | 2.722936000  |
| H | -3.455298000 | -0.836729000 | 3.005044000  |
| H | -5.058192000 | -1.447994000 | 3.378349000  |
| H | -5.750363000 | 0.709014000  | 0.542990000  |
| H | -5.739306000 | 0.503004000  | 2.289476000  |
| H | -4.260047000 | 1.002075000  | 1.456240000  |
| H | -6.793692000 | -1.643965000 | 1.817596000  |
| H | -6.515897000 | -1.839960000 | 0.090285000  |
| H | -5.880937000 | -3.031451000 | 1.234487000  |
| H | -2.323909000 | -0.882809000 | -2.883567000 |
| H | -3.667335000 | -1.993232000 | -3.241847000 |
| H | -3.719277000 | -0.324439000 | -3.797015000 |
| H | -6.260963000 | -0.164052000 | -1.191548000 |
| H | -5.887119000 | -0.187103000 | -2.908335000 |
| H | -5.940856000 | -1.704614000 | -2.014114000 |
| H | -4.296473000 | 1.535416000  | -2.461124000 |
| H | -4.187843000 | 1.515987000  | -0.696581000 |
| H | -2.750190000 | 1.233202000  | -1.662359000 |
| S | -1.392590000 | 3.069888000  | 0.953274000  |
| C | -1.305268000 | 4.696059000  | 0.082341000  |
| F | -1.748028000 | 4.573042000  | -1.168556000 |
| F | -2.059641000 | 5.587651000  | 0.719436000  |
| F | -0.051466000 | 5.143750000  | 0.049642000  |
| O | -2.818518000 | 2.793667000  | 1.080431000  |
| O | -0.618281000 | 3.235818000  | 2.177553000  |

|    |              |              |              |
|----|--------------|--------------|--------------|
| C  | -1.229211000 | -0.141368000 | 2.056525000  |
| H  | -0.408468000 | 0.590804000  | 2.025219000  |
| C  | -0.769099000 | -1.415205000 | 2.732154000  |
| H  | -1.592159000 | -2.127865000 | 2.829347000  |
| H  | -0.004574000 | -1.901083000 | 2.113494000  |
| Br | 0.192637000  | -0.495721000 | -2.099436000 |
| H  | -2.086573000 | 0.339200000  | 2.530186000  |
| C  | -0.191540000 | -1.116417000 | 4.122075000  |
| H  | 0.170146000  | -2.032258000 | 4.602424000  |
| H  | 0.647184000  | -0.413769000 | 4.056302000  |
| H  | -0.950453000 | -0.665701000 | 4.770990000  |

Zero-point correction = 0.974045 (Hartree/Particle)  
 Thermal correction to Energy = 1.034136  
 Thermal correction to Enthalpy = 1.035080  
 Thermal correction to Gibbs Free Energy = 0.881443  
 Sum of electronic and zero-point Energies = -5764.838710  
 Sum of electronic and thermal Energies = -5764.778619  
 Sum of electronic and thermal Enthalpies = -5764.777675  
 Sum of electronic and thermal Free Energies = -5764.931312  
 E(RM06L) = -5772.11501102

### TS\_OA\_PrBu3\_PhBr

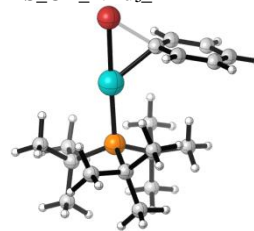

|    |              |              |              |
|----|--------------|--------------|--------------|
| C  | -2.927223000 | 3.045771000  | 0.011570000  |
| C  | -2.604622000 | 0.972147000  | 1.219263000  |
| C  | -2.493821000 | 0.294813000  | -0.001382000 |
| C  | -2.682566000 | 0.971963000  | -1.212621000 |
| H  | -2.659803000 | 0.426125000  | -2.149237000 |
| H  | -2.521817000 | 0.427864000  | 2.152985000  |
| C  | -2.875093000 | 2.349896000  | -1.194490000 |
| C  | -2.797087000 | 2.349648000  | 1.212709000  |
| H  | -2.991277000 | 2.878622000  | -2.136154000 |
| H  | -2.853538000 | 2.879005000  | 2.159573000  |
| Pd | -0.657486000 | -0.870665000 | -0.059021000 |
| Br | -2.992554000 | -1.744145000 | 0.004550000  |
| H  | -3.084323000 | 4.119684000  | 0.016838000  |
| H  | 2.401511000  | -0.698548000 | 3.624285000  |
| C  | 2.322513000  | -0.917763000 | 2.552177000  |
| C  | 2.031024000  | 0.397096000  | 1.805626000  |
| H  | 1.510538000  | -1.640940000 | 2.421372000  |
| H  | 3.263551000  | -1.382589000 | 2.251002000  |
| P  | 1.535592000  | 0.004656000  | -0.007136000 |
| C  | 3.232422000  | 1.337361000  | 1.990252000  |
| C  | 0.802565000  | 0.997460000  | 2.521688000  |
| C  | 2.807606000  | -1.240101000 | -0.722649000 |
| C  | 1.635348000  | 1.629494000  | -1.023955000 |
| H  | 3.029908000  | 2.347693000  | 1.626997000  |
| H  | 3.457892000  | 1.421204000  | 3.061379000  |
| H  | 4.133923000  | 0.970444000  | 1.493218000  |
| H  | 0.443735000  | 1.927987000  | 2.083217000  |
| H  | -0.028356000 | 0.285706000  | 2.511728000  |
| H  | 1.069657000  | 1.200382000  | 3.567182000  |
| C  | 4.283979000  | -0.964220000 | -0.396706000 |
| C  | 2.434678000  | -2.653312000 | -0.225232000 |
| C  | 2.648183000  | -1.296325000 | -2.253155000 |
| C  | 0.863743000  | 1.435809000  | -2.346128000 |
| C  | 0.872854000  | 2.735409000  | -0.269858000 |
| C  | 3.049827000  | 2.135425000  | -1.348415000 |
| H  | 4.606068000  | 0.031381000  | -0.711388000 |
| H  | 4.501651000  | -1.070860000 | 0.668585000  |

|   |              |              |              |
|---|--------------|--------------|--------------|
| H | 4.908927000  | -1.694673000 | -0.926783000 |
| H | 1.397526000  | -2.897564000 | -0.480900000 |
| H | 3.089682000  | -3.383047000 | -0.718666000 |
| H | 2.554667000  | -2.783884000 | 0.849690000  |
| H | 3.217883000  | -2.153854000 | -2.631928000 |
| H | 1.601525000  | -1.440052000 | -2.541780000 |
| H | 3.037181000  | -0.407046000 | -2.753471000 |
| H | 1.330613000  | 0.722870000  | -3.024661000 |
| H | -0.161557000 | 1.108390000  | -2.154839000 |
| H | 0.819520000  | 2.401525000  | -2.866259000 |
| H | 1.400054000  | 3.087856000  | 0.619514000  |
| H | 0.760410000  | 3.597251000  | -0.939314000 |
| H | -0.132746000 | 2.410390000  | 0.015300000  |
| H | 2.971742000  | 3.108045000  | -1.851402000 |
| H | 3.665327000  | 2.276554000  | -0.457174000 |
| H | 3.583789000  | 1.466485000  | -2.028306000 |

Zero-point correction = 0.468975 (Hartree/Particle)

Thermal correction to Energy = 0.495221

Thermal correction to Enthalpy = 0.496166

Thermal correction to Gibbs Free Energy = 0.414011

Sum of electronic and zero-point Energies = -3744.047786

Sum of electronic and thermal Energies = -3744.021540

Sum of electronic and thermal Enthalpies = -3744.020595

Sum of electronic and thermal Free Energies = -3744.102749

E(RM06L) = -3748.80965136

#### TS\_OA\_PtBu3\_PhCl

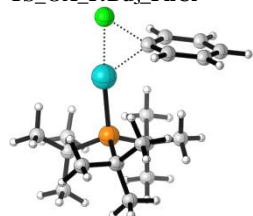

|    |              |              |              |
|----|--------------|--------------|--------------|
| C  | -3.712423000 | 2.259312000  | 0.007156000  |
| C  | -2.901285000 | 0.324844000  | 1.217867000  |
| C  | -2.627598000 | -0.305780000 | -0.000912000 |
| C  | -2.975101000 | 0.301947000  | -1.212585000 |
| H  | -2.827110000 | -0.227054000 | -2.147590000 |
| H  | -2.697050000 | -0.185502000 | -2.152062000 |
| C  | -3.495320000 | 1.592459000  | -1.196877000 |
| C  | -3.421589000 | 1.614807000  | 1.208913000  |
| H  | -3.735864000 | 2.075653000  | -2.139585000 |
| H  | -3.606061000 | 2.115239000  | 2.155355000  |
| Pd | -0.692673000 | -1.203542000 | -0.054096000 |
| H  | -4.125602000 | 3.262860000  | 0.010456000  |
| H  | 2.250272000  | -0.428266000 | 3.627510000  |
| C  | 2.215006000  | -0.663927000 | 2.556568000  |
| C  | 1.693440000  | 0.574360000  | 1.803843000  |
| H  | 1.545051000  | -1.521058000 | 2.430197000  |
| H  | 3.225120000  | -0.954915000 | 2.261033000  |
| P  | 1.276393000  | 0.096122000  | -0.007383000 |
| C  | 2.706815000  | 1.715805000  | 1.981908000  |
| C  | 0.378659000  | 0.946825000  | 2.520834000  |
| C  | 2.749908000  | -0.900831000 | -0.721413000 |
| C  | 1.075608000  | 1.705755000  | -1.028489000 |
| H  | 2.319959000  | 2.672668000  | 1.623027000  |
| H  | 2.921001000  | 1.837734000  | 3.051479000  |
| H  | 3.656040000  | 1.520558000  | 1.477063000  |
| H  | -0.147048000 | 1.791322000  | 2.077143000  |
| H  | -0.308017000 | 0.095412000  | 2.523249000  |
| H  | 0.609022000  | 1.205076000  | 3.562745000  |
| C  | 4.150892000  | -0.363343000 | -0.389058000 |
| C  | 2.635630000  | -2.357332000 | -0.221738000 |
| C  | 2.613728000  | -0.988831000 | -2.252798000 |
| C  | 0.358020000  | 1.366424000  | -2.351832000 |

|    |              |              |              |
|----|--------------|--------------|--------------|
| C  | 0.121586000  | 2.654994000  | -0.279513000 |
| C  | 2.374059000  | 2.461207000  | -1.355010000 |
| H  | 4.286569000  | 0.676022000  | -0.697411000 |
| H  | 4.381615000  | -0.434624000 | 0.676391000  |
| H  | 4.899089000  | -0.965309000 | -0.920757000 |
| H  | 1.669193000  | -2.793645000 | -0.499275000 |
| H  | 3.424613000  | -2.954092000 | -0.697524000 |
| H  | 2.754654000  | -2.462513000 | 0.856003000  |
| H  | 3.332382000  | -1.730604000 | -2.622517000 |
| H  | 1.613143000  | -1.320236000 | -2.550214000 |
| H  | 2.840363000  | -0.046069000 | -2.755126000 |
| H  | 0.953090000  | 0.749545000  | -3.023873000 |
| H  | -0.589942000 | 0.856883000  | -2.163679000 |
| H  | 0.139144000  | 2.305100000  | -2.876997000 |
| H  | 0.574394000  | 3.099134000  | 0.609566000  |
| H  | -0.144425000 | 3.480139000  | -0.951600000 |
| H  | -0.808984000 | 2.154417000  | 0.004932000  |
| H  | 2.119045000  | 3.393529000  | -1.875238000 |
| H  | 2.946309000  | 2.729878000  | -0.464262000 |
| H  | 3.027705000  | 1.891987000  | -2.021115000 |
| Cl | -2.789461000 | -2.329431000 | 0.010970000  |

Zero-point correction = 0.470286 (Hartree/Particle)

Thermal correction to Energy = 0.495929

Thermal correction to Enthalpy = 0.496874

Thermal correction to Gibbs Free Energy = 0.416893

Sum of electronic and zero-point Energies = -1632.782928

Sum of electronic and thermal Energies = -1632.757285

Sum of electronic and thermal Enthalpies = -1632.756341

Sum of electronic and thermal Free Energies = -1632.836321

E(RM06L) = -1634.94992908

#### TS\_OA\_PtBu3\_PhOTf

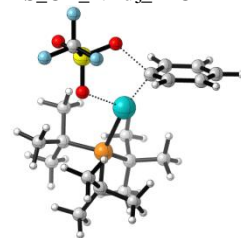

|    |              |              |              |
|----|--------------|--------------|--------------|
| C  | -1.560690000 | 4.507278000  | 0.206413000  |
| C  | -2.183594000 | 2.302863000  | 1.011138000  |
| C  | -1.639339000 | 1.793112000  | -0.171929000 |
| C  | -1.168060000 | 2.591094000  | -1.219452000 |
| H  | -0.943963000 | 2.162316000  | -2.191447000 |
| Pd | -0.099471000 | 0.612997000  | -0.031466000 |
| H  | -2.616922000 | 1.637336000  | 1.748785000  |
| C  | -1.106591000 | 3.975672000  | -0.991852000 |
| C  | -2.099585000 | 3.674857000  | 1.198991000  |
| H  | -0.739593000 | 4.628748000  | -1.778111000 |
| H  | -2.461895000 | 4.106097000  | 2.127633000  |
| O  | -2.910318000 | 0.413677000  | -0.887118000 |
| S  | -2.617857000 | -1.039647000 | -0.634361000 |
| O  | -2.628717000 | -1.886490000 | -1.811816000 |
| O  | -1.461954000 | -1.206611000 | 0.288366000  |
| C  | -4.045721000 | -1.543016000 | 0.415346000  |
| F  | -3.900809000 | -2.807549000 | 0.795852000  |
| F  | -5.181520000 | -1.417160000 | -0.258929000 |
| F  | -4.097770000 | -0.768977000 | 1.500153000  |
| H  | -1.524239000 | 5.579657000  | 0.369302000  |
| P  | 2.133239000  | -0.327786000 | 0.062359000  |
| C  | 2.192334000  | -1.922434000 | -0.995226000 |
| C  | 3.599365000  | -2.411900000 | -1.371601000 |
| H  | 3.511895000  | -3.369299000 | -1.900590000 |
| H  | 4.119117000  | -1.722126000 | -2.041216000 |
| H  | 4.232339000  | -2.578001000 | -0.495842000 |

|   |             |              |              |
|---|-------------|--------------|--------------|
| C | 1.453649000 | -3.060762000 | -0.264472000 |
| H | 2.001217000 | -3.441959000 | 0.600271000  |
| H | 0.448586000 | -2.757859000 | 0.043821000  |
| H | 1.341854000 | -3.895864000 | -0.966787000 |
| C | 1.369734000 | -1.675891000 | -2.278960000 |
| H | 0.322310000 | -1.462303000 | -2.042182000 |
| H | 1.754570000 | -0.870568000 | -2.903923000 |
| H | 1.384169000 | -2.592704000 | -2.881776000 |
| C | 2.583937000 | -0.756537000 | 1.870035000  |
| C | 3.775067000 | -1.710532000 | 2.049755000  |
| H | 3.968368000 | -1.843357000 | 3.121993000  |
| H | 3.581379000 | -2.701454000 | 1.633252000  |
| H | 4.691281000 | -1.324155000 | 1.595672000  |
| C | 1.331694000 | -1.365803000 | 2.536949000  |
| H | 1.011404000 | -2.306281000 | 2.092229000  |
| H | 1.555873000 | -1.556789000 | 3.594267000  |
| H | 0.483767000 | -0.674030000 | 2.491344000  |
| C | 2.874323000 | 0.538052000  | 2.650688000  |
| H | 3.824174000 | 0.999995000  | 2.372938000  |
| H | 2.072108000 | 1.273992000  | 2.528421000  |
| H | 2.936288000 | 0.292973000  | 3.718074000  |
| C | 3.407780000 | 0.927890000  | -0.620623000 |
| C | 3.243925000 | 1.032893000  | -2.148572000 |
| H | 3.846164000 | 1.877154000  | -2.505990000 |
| H | 3.588996000 | 0.143974000  | -2.679726000 |
| H | 2.202808000 | 1.229304000  | -2.427483000 |
| C | 3.054808000 | 2.331346000  | -0.081141000 |
| H | 3.183065000 | 2.431410000  | 0.996015000  |
| H | 3.718540000 | 3.064593000  | -0.557024000 |
| H | 2.021819000 | 2.603800000  | -0.325667000 |
| C | 4.879881000 | 0.623279000  | -0.301898000 |
| H | 5.188467000 | -0.366677000 | -0.646177000 |
| H | 5.516569000 | 1.361393000  | -0.806411000 |
| H | 5.093589000 | 0.693749000  | 0.767475000  |

Zero-point correction = 0.497051 (Hartree/Particle)  
 Thermal correction to Energy = 0.529903  
 Thermal correction to Enthalpy = 0.530847  
 Thermal correction to Gibbs Free Energy = 0.432864  
 Sum of electronic and zero-point Energies = -2133.793830  
 Sum of electronic and thermal Energies -2133.760979  
 Sum of electronic and thermal Enthalpies = -2133.760035  
 Sum of electronic and thermal Free Energies = -2133.858018  
 E(RM06L) = -2136.38036878

### TS\_OA\_CPhos\_PhBr

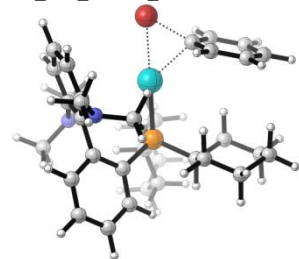

|   |             |              |              |
|---|-------------|--------------|--------------|
| C | 2.659602000 | -0.270379000 | 0.235366000  |
| C | 2.876767000 | -1.553951000 | 0.785604000  |
| C | 3.216430000 | -2.620911000 | -0.050001000 |
| C | 3.351542000 | -2.425418000 | -1.416429000 |
| C | 3.149451000 | -1.169340000 | -1.967126000 |
| C | 2.802250000 | -0.085577000 | -1.154856000 |
| C | 2.432308000 | 0.891782000  | 1.154194000  |
| C | 1.246518000 | 1.649326000  | 1.241633000  |
| C | 1.206454000 | 2.719155000  | 2.149126000  |
| C | 2.291397000 | 3.050145000  | 2.949073000  |
| C | 3.456594000 | 2.294891000  | 2.865424000  |
| C | 3.514197000 | 1.228701000  | 1.980838000  |

|    |              |              |              |
|----|--------------|--------------|--------------|
| H  | 3.355848000  | -3.612264000 | 0.366168000  |
| H  | 3.267460000  | -1.030915000 | -3.035464000 |
| H  | 4.313602000  | 2.530451000  | 3.489533000  |
| P  | -0.257746000 | 1.208201000  | 0.259572000  |
| Pd | -0.302628000 | -0.957853000 | -0.592352000 |
| C  | -1.639330000 | 1.536193000  | 1.472677000  |
| C  | -3.005354000 | 1.315967000  | 0.803888000  |
| C  | -1.507904000 | 0.628967000  | 2.705995000  |
| H  | -1.591614000 | 2.581721000  | 1.807491000  |
| C  | -4.160120000 | 1.527170000  | 1.788562000  |
| H  | -3.044107000 | 0.295777000  | 0.403700000  |
| H  | -3.131633000 | 1.994384000  | -0.046558000 |
| C  | -2.653523000 | 0.858929000  | 3.696011000  |
| H  | -1.521101000 | -0.418164000 | 2.371506000  |
| H  | -0.546939000 | 0.798747000  | 3.204358000  |
| C  | -4.014376000 | 0.646220000  | 3.030313000  |
| H  | -5.111120000 | 1.317458000  | 1.284316000  |
| H  | -4.188908000 | 2.583423000  | 2.094354000  |
| H  | -2.539860000 | 0.187318000  | 4.555426000  |
| H  | -2.594341000 | 1.885113000  | 4.087241000  |
| H  | -4.824661000 | 0.850434000  | 3.740496000  |
| H  | -4.104866000 | -0.405900000 | 2.730362000  |
| C  | -0.361014000 | 2.597603000  | -0.992100000 |
| C  | -1.187282000 | 2.176777000  | -2.220784000 |
| C  | -0.814002000 | 3.965756000  | -0.464307000 |
| H  | 0.684823000  | 2.684873000  | -1.312743000 |
| C  | -1.161850000 | 3.249742000  | -3.313407000 |
| H  | -2.229035000 | 1.992395000  | -1.927931000 |
| H  | -0.808124000 | 1.223016000  | -2.604105000 |
| C  | -0.769515000 | 5.026289000  | -1.570934000 |
| H  | -1.841694000 | 3.901306000  | -0.080903000 |
| H  | -0.178053000 | 4.283182000  | 0.368665000  |
| C  | -1.614164000 | 4.609756000  | -2.776761000 |
| H  | -1.793755000 | 2.939676000  | -4.154149000 |
| H  | -0.139612000 | 3.344676000  | -3.706559000 |
| H  | -1.113314000 | 5.990056000  | -1.176760000 |
| H  | 0.273068000  | 5.167762000  | -1.890523000 |
| H  | -1.556089000 | 5.370119000  | -3.564473000 |
| H  | -2.669120000 | 4.546627000  | -2.473033000 |
| C  | -1.972677000 | -2.403709000 | -0.701808000 |
| C  | -2.985906000 | -1.902961000 | -1.530584000 |
| C  | -2.255529000 | -2.806951000 | 0.610004000  |
| C  | -4.262248000 | -1.729984000 | -1.007537000 |
| H  | -2.763296000 | -1.638561000 | -2.558000000 |
| C  | -3.540509000 | -2.623490000 | 1.110564000  |
| H  | -1.475513000 | -3.244352000 | 1.223007000  |
| C  | -4.547044000 | -2.085143000 | 0.310853000  |
| H  | -5.041800000 | -1.315844000 | -1.640489000 |
| H  | -3.755373000 | -2.914206000 | 2.135128000  |
| C  | 2.162041000  | 1.217740000  | -3.103672000 |
| C  | 3.654354000  | 2.168037000  | -1.483695000 |
| H  | 1.354807000  | 0.494423000  | -3.246624000 |
| H  | 1.779322000  | 2.215853000  | -3.343411000 |
| H  | 2.974151000  | 0.996433000  | -3.819143000 |
| H  | 3.921568000  | 2.198917000  | -0.426710000 |
| H  | 4.560096000  | 1.933933000  | -2.070397000 |
| H  | 3.304458000  | 3.165768000  | -1.772723000 |
| C  | 3.484308000  | -2.836784000 | 2.769380000  |
| C  | 1.384179000  | -1.677389000 | 2.687069000  |
| H  | 4.511941000  | -2.840984000 | 2.395502000  |
| H  | 3.514045000  | -2.701425000 | 3.856117000  |
| H  | 3.033711000  | -3.826627000 | 2.570673000  |
| H  | 0.852183000  | -0.838339000 | 2.241990000  |
| H  | 0.820169000  | -2.597618000 | 2.448511000  |
| H  | 1.396006000  | -1.544918000 | 3.774787000  |
| H  | 2.222100000  | 3.886123000  | 3.638902000  |
| H  | 3.615906000  | -3.260666000 | -2.058486000 |
| H  | 4.415337000  | 0.626940000  | 1.916420000  |
| H  | 0.296586000  | 3.300821000  | 2.252832000  |
| H  | -5.547870000 | -1.951828000 | 0.709297000  |

|    |              |              |              |
|----|--------------|--------------|--------------|
| N  | 2.586447000  | 1.205545000  | -1.717166000 |
| N  | 2.748379000  | -1.734290000 | 2.187567000  |
| Br | -0.357954000 | -3.271675000 | -1.607178000 |

Zero-point correction = 0.743517 (Hartree/Particle)  
 Thermal correction to Energy = 0.782937  
 Thermal correction to Enthalpy = 0.783881  
 Thermal correction to Gibbs Free Energy = 0.670884  
 Sum of electronic and zero-point Energies = -4471.205507  
 Sum of electronic and thermal Energies = -4471.166088  
 Sum of electronic and thermal Enthalpies = -4471.165144  
 Sum of electronic and thermal Free Energies = -4471.278141  
 E(RM06L) = -4476.61135995

### TS\_OA\_CPhos\_PhCl

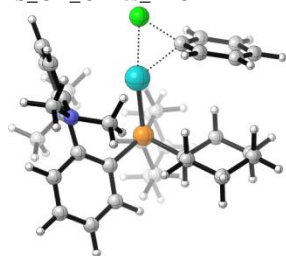

|    |              |              |              |
|----|--------------|--------------|--------------|
| C  | 2.685199000  | -0.220945000 | 0.016518000  |
| C  | 3.041944000  | -1.557675000 | 0.311000000  |
| C  | 3.416281000  | -2.420259000 | -0.723108000 |
| C  | 3.452275000  | -1.970348000 | -2.034526000 |
| C  | 3.120052000  | -0.658476000 | -2.334426000 |
| C  | 2.736612000  | 0.226136000  | -1.320894000 |
| C  | 2.402711000  | 0.729490000  | 1.140473000  |
| C  | 1.155795000  | 1.333810000  | 1.402162000  |
| C  | 1.059137000  | 2.217318000  | 2.487646000  |
| C  | 2.146703000  | 2.509712000  | 3.299446000  |
| C  | 3.371849000  | 1.902163000  | 3.044917000  |
| C  | 3.487065000  | 1.020965000  | 1.980117000  |
| H  | 3.660678000  | -3.453665000 | -0.505528000 |
| H  | 3.165441000  | -0.318987000 | -3.362489000 |
| H  | 4.231963000  | 2.108586000  | 3.674985000  |
| P  | -0.345515000 | 0.910363000  | 0.408609000  |
| Pd | -0.148520000 | -1.045582000 | -0.833753000 |
| C  | -1.691909000 | 0.876280000  | 1.698995000  |
| C  | -3.061173000 | 0.652562000  | 1.038819000  |
| C  | -1.418263000 | -0.225672000 | 2.734574000  |
| H  | -1.721235000 | 1.842181000  | 2.222208000  |
| C  | -4.184231000 | 0.549793000  | 2.075401000  |
| H  | -3.024674000 | -0.267999000 | 0.446627000  |
| H  | -3.290848000 | 1.466745000  | 0.343628000  |
| C  | -2.536250000 | -0.306979000 | 3.777893000  |
| H  | -1.341070000 | -1.187743000 | 2.208232000  |
| H  | -0.458098000 | -0.049674000 | 3.232562000  |
| C  | -3.896899000 | -0.532852000 | 3.116528000  |
| H  | -5.131042000 | 0.341643000  | 1.563039000  |
| H  | -4.302356000 | 1.518757000  | 2.582653000  |
| H  | -2.318816000 | -1.111783000 | 4.490242000  |
| H  | -2.561596000 | 0.628349000  | 4.355919000  |
| H  | -4.691237000 | -0.556591000 | 3.872128000  |
| H  | -3.895236000 | -1.511302000 | 2.618604000  |
| C  | -0.649107000 | 2.466041000  | -0.586605000 |
| C  | -1.492912000 | 2.166167000  | -1.839057000 |
| C  | -1.202925000 | 3.673487000  | 0.182142000  |
| H  | 0.364954000  | 2.713775000  | -0.924574000 |
| C  | -1.636864000 | 3.401437000  | -2.732749000 |
| H  | -2.492063000 | 1.818193000  | -1.547139000 |
| H  | -1.036300000 | 1.338589000  | -2.393256000 |
| C  | -1.326804000 | 4.899064000  | -0.731084000 |
| H  | -2.195072000 | 3.439133000  | 0.591449000  |
| H  | -0.553175000 | 3.915400000  | 1.029891000  |

|    |              |              |              |
|----|--------------|--------------|--------------|
| C  | -2.193205000 | 4.596437000  | -1.955418000 |
| H  | -2.280463000 | 3.167669000  | -3.589141000 |
| H  | -0.653009000 | 3.670359000  | -3.142803000 |
| H  | -1.741620000 | 5.742846000  | -0.166909000 |
| H  | -0.323395000 | 5.202081000  | -1.063557000 |
| H  | -2.257959000 | 5.477757000  | -2.604279000 |
| H  | -3.217037000 | 4.368934000  | -1.625050000 |
| C  | -1.831600000 | -2.371188000 | -1.239998000 |
| C  | -2.822175000 | -1.742717000 | -2.009472000 |
| C  | -2.177968000 | -3.083892000 | -0.082707000 |
| C  | -4.138060000 | -1.757999000 | -1.563388000 |
| H  | -2.550456000 | -1.239637000 | -2.930730000 |
| C  | -3.503035000 | -3.088310000 | 0.339733000  |
| H  | -1.413505000 | -3.617781000 | 0.471143000  |
| C  | -4.488983000 | -2.424972000 | -0.389049000 |
| H  | -4.898573000 | -1.245376000 | -2.145736000 |
| H  | -3.765862000 | -3.627512000 | 1.245787000  |
| Cl | -0.282960000 | -3.035254000 | -2.199612000 |
| C  | 1.913381000  | 1.811421000  | -2.970559000 |
| C  | 3.396950000  | 2.565253000  | -1.244486000 |
| H  | 1.153903000  | 1.067273000  | -3.224779000 |
| H  | 1.451115000  | 2.803979000  | -3.006814000 |
| H  | 2.707587000  | 1.790516000  | -3.737903000 |
| H  | 3.708673000  | 2.422165000  | -0.209397000 |
| H  | 4.290240000  | 2.521242000  | -1.891969000 |
| H  | 2.957865000  | 3.565774000  | -1.329467000 |
| C  | 3.872361000  | -3.124065000 | 1.985265000  |
| C  | 1.692299000  | -2.150722000 | 2.232757000  |
| H  | 4.870663000  | -2.972986000 | 1.565387000  |
| H  | 3.963576000  | -3.187038000 | 3.075041000  |
| H  | 3.483526000  | -4.095098000 | 1.627908000  |
| H  | 1.079282000  | -1.280912000 | 2.004757000  |
| H  | 1.172635000  | -3.042960000 | 1.839098000  |
| H  | 1.772571000  | -2.241761000 | 3.321659000  |
| H  | 2.033501000  | 3.199444000  | 4.130651000  |
| H  | 3.740809000  | -2.649879000 | -2.830959000 |
| H  | 4.436493000  | 0.534317000  | 1.779981000  |
| H  | 0.104762000  | 2.676817000  | 2.722390000  |
| H  | -5.521165000 | -2.440194000 | -0.054114000 |
| N  | 2.397113000  | 1.575847000  | -1.623833000 |
| N  | 3.020184000  | -1.999535000 | 1.659033000  |

Zero-point correction = 0.744195 (Hartree/Particle)  
 Thermal correction to Energy = 0.783268  
 Thermal correction to Enthalpy = 0.784212  
 Thermal correction to Gibbs Free Energy = 0.672304  
 Sum of electronic and zero-point Energies = -2359.941516  
 Sum of electronic and thermal Energies = -2359.902443  
 Sum of electronic and thermal Enthalpies = -2359.901499  
 Sum of electronic and thermal Free Energies = -2360.013407  
 E(RM06L) = -2362.75247245

### TS\_OA\_CPhos\_PhOTf

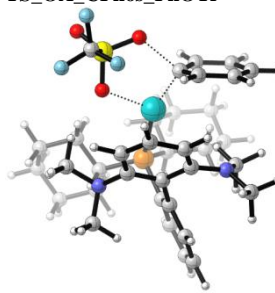

|   |              |              |             |
|---|--------------|--------------|-------------|
| C | -1.380119000 | -3.492895000 | 2.825188000 |
| C | -2.495274000 | -2.115699000 | 1.164146000 |
| C | -1.887521000 | -1.018417000 | 1.773281000 |
| C | -1.163802000 | -1.086308000 | 2.970201000 |

|    |              |              |              |
|----|--------------|--------------|--------------|
| H  | -0.908507000 | -0.189880000 | 3.526397000  |
| Pd | -0.524016000 | -0.040946000 | 0.797975000  |
| H  | -3.111686000 | -1.986386000 | 0.284521000  |
| C  | -0.889061000 | -2.369720000 | 3.473983000  |
| C  | -2.182498000 | -3.363990000 | 1.681067000  |
| H  | -0.322934000 | -2.468873000 | 4.395689000  |
| H  | -2.558834000 | -4.251233000 | 1.180996000  |
| O  | -3.292215000 | 0.468328000  | 1.870816000  |
| S  | -3.185110000 | 1.642485000  | 0.946439000  |
| O  | -3.432350000 | 2.937691000  | 1.550220000  |
| O  | -1.986429000 | 1.546804000  | 0.067845000  |
| C  | -4.557193000 | 1.346404000  | -0.249709000 |
| F  | -4.437307000 | 2.169585000  | -1.289544000 |
| F  | -5.734243000 | 1.546685000  | 0.329563000  |
| F  | -4.508644000 | 0.089329000  | -0.697539000 |
| C  | 0.159338000  | -1.407375000 | -2.028862000 |
| C  | -0.537959000 | -2.595106000 | -1.725184000 |
| C  | -1.902588000 | -2.692548000 | -2.026443000 |
| C  | -2.583450000 | -1.615199000 | -2.561853000 |
| C  | -1.920269000 | -0.417460000 | -2.804473000 |
| C  | -0.550376000 | -0.304537000 | -2.566424000 |
| C  | 1.655645000  | -1.412343000 | -1.973383000 |
| C  | 2.459898000  | -0.616817000 | -1.134385000 |
| C  | 3.852946000  | -0.753610000 | -1.214913000 |
| C  | 4.457029000  | -1.644446000 | -2.092482000 |
| C  | 3.662203000  | -2.428367000 | -2.921510000 |
| C  | 2.281570000  | -2.303235000 | -2.858324000 |
| H  | -2.424021000 | -3.611003000 | -1.773231000 |
| H  | -2.475394000 | 0.427197000  | -3.193769000 |
| H  | 5.539229000  | -1.726484000 | -2.123701000 |
| H  | 4.112922000  | -3.131946000 | -3.615056000 |
| P  | 1.719807000  | 0.521412000  | 0.109304000  |
| C  | 2.833979000  | 0.298816000  | 1.591349000  |
| C  | 2.398413000  | 1.231016000  | 2.735639000  |
| C  | 2.822538000  | -1.165839000 | 2.062007000  |
| H  | 3.863821000  | 0.565788000  | 1.317223000  |
| C  | 3.241886000  | 1.017080000  | 3.996658000  |
| H  | 1.339965000  | 1.042963000  | 2.967029000  |
| H  | 2.468778000  | 2.278774000  | 2.426752000  |
| C  | 3.675173000  | -1.366507000 | 3.317513000  |
| H  | 1.787551000  | -1.459519000 | 2.286968000  |
| H  | 3.173026000  | -1.825334000 | 1.260856000  |
| C  | 3.217652000  | -0.443853000 | 4.448615000  |
| H  | 2.878718000  | 1.673013000  | 4.796164000  |
| H  | 4.280338000  | 1.314126000  | 3.791073000  |
| H  | 3.622998000  | -2.415186000 | 3.632813000  |
| H  | 4.728913000  | -1.158440000 | 3.082444000  |
| H  | 3.847717000  | -0.579927000 | 5.335096000  |
| H  | 2.192474000  | -0.714439000 | 4.741050000  |
| C  | 2.079438000  | 2.227542000  | -0.556305000 |
| C  | 1.097065000  | 3.262312000  | 0.022645000  |
| C  | 3.532881000  | 2.706635000  | -0.439973000 |
| H  | 1.840470000  | 2.108599000  | -1.620140000 |
| C  | 1.300100000  | 4.639800000  | -0.615683000 |
| H  | 1.241193000  | 3.353227000  | 1.107367000  |
| H  | 0.066922000  | 2.923346000  | -0.121708000 |
| C  | 3.710538000  | 4.082384000  | -1.093403000 |
| H  | 3.822207000  | 2.780866000  | 0.617480000  |
| H  | 4.212904000  | 1.988521000  | -0.911168000 |
| C  | 2.750454000  | 5.111978000  | -0.493708000 |
| H  | 0.618464000  | 5.362616000  | -0.153697000 |
| H  | 1.030256000  | 4.589620000  | -1.680255000 |
| H  | 4.749586000  | 4.414272000  | -0.981930000 |
| H  | 3.519425000  | 3.993918000  | -2.172587000 |
| H  | 2.879218000  | 6.083239000  | -0.985335000 |
| H  | 2.996268000  | 5.258676000  | 0.567995000  |
| C  | -0.659239000 | 2.106014000  | -2.884253000 |
| C  | 0.977106000  | 0.825910000  | -4.073442000 |
| H  | -1.288074000 | 2.144389000  | -1.992979000 |
| H  | 0.013410000  | 2.970444000  | -2.874926000 |

|   |              |              |              |
|---|--------------|--------------|--------------|
| H | -1.294166000 | 2.195192000  | -3.783480000 |
| H | 1.623142000  | -0.052113000 | -4.053271000 |
| H | 0.366539000  | 0.793306000  | -4.992467000 |
| H | 1.616065000  | 1.715410000  | -4.116741000 |
| C | 0.989697000  | -3.521678000 | 0.006167000  |
| C | 0.200757000  | -4.942878000 | -1.805278000 |
| H | 0.758400000  | -2.592036000 | 0.533126000  |
| H | 0.867555000  | -4.347100000 | 0.719721000  |
| H | 2.045827000  | -3.493942000 | -0.308761000 |
| H | -0.572941000 | -5.023338000 | -2.572866000 |
| H | 1.185454000  | -5.027115000 | -2.300082000 |
| H | 0.097837000  | -5.795843000 | -1.121871000 |
| H | -3.647485000 | -1.689601000 | -2.764553000 |
| H | 4.488295000  | -0.167727000 | -0.558887000 |
| H | 1.655348000  | -2.903614000 | -3.511881000 |
| H | -1.168718000 | -4.480981000 | 3.221579000  |
| N | 0.149102000  | 0.896618000  | -2.874532000 |
| N | 0.056454000  | -3.702078000 | -1.079841000 |

Zero-point correction = 0.772050 (Hartree/Particle)  
 Thermal correction to Energy = 0.817920  
 Thermal correction to Enthalpy = 0.818864  
 Thermal correction to Gibbs Free Energy = 0.692011  
 Sum of electronic and zero-point Energies = -2860.953518  
 Sum of electronic and thermal Energies = -2860.907647  
 Sum of electronic and thermal Enthalpies = -2860.906703  
 Sum of electronic and thermal Free Energies = -2861.033556  
 E(RM06L) = -2864.18251192

#### TS\_OA\_IPent\_PhBr

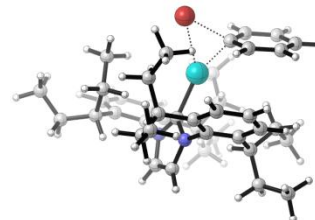

|   |              |              |              |
|---|--------------|--------------|--------------|
| C | 0.468978000  | 0.176345000  | -0.883502000 |
| C | 1.477869000  | 0.132195000  | -2.920182000 |
| C | 0.183874000  | 0.469523000  | -3.123415000 |
| N | -0.409849000 | 0.491280000  | -1.873504000 |
| N | 1.631043000  | -0.039253000 | -1.551261000 |
| H | -0.363409000 | 0.693823000  | -4.025018000 |
| H | 2.297836000  | -0.001950000 | -3.607796000 |
| C | -1.799538000 | 0.721603000  | -1.600845000 |
| C | -2.212989000 | 2.016562000  | -1.248645000 |
| C | -2.660582000 | -0.386459000 | -1.622192000 |
| C | -3.566614000 | 2.184117000  | -0.941753000 |
| C | -4.000080000 | -0.160160000 | -1.302693000 |
| C | -4.449030000 | 1.111809000  | -0.973654000 |
| H | -3.932627000 | 3.161188000  | -0.651770000 |
| H | -4.698314000 | -0.990352000 | -1.291747000 |
| H | -5.494916000 | 1.268576000  | -0.725969000 |
| C | 2.861042000  | -0.423228000 | -0.919396000 |
| C | 3.048227000  | -1.773013000 | -0.582455000 |
| C | 3.824009000  | 0.574085000  | -0.686434000 |
| C | 4.262850000  | -2.109435000 | 0.022417000  |
| C | 5.022985000  | 0.173261000  | -0.099468000 |
| C | 5.238761000  | -1.152412000 | 0.254599000  |
| H | 4.445424000  | -3.133581000 | 0.321067000  |
| H | 5.800423000  | 0.903077000  | 0.089811000  |
| H | 6.176287000  | -1.440092000 | 0.721237000  |
| C | -1.222279000 | 3.166549000  | -1.182129000 |
| C | -0.253603000 | 2.752201000  | -1.476752000 |
| H | -0.966035000 | 3.694735000  | 0.252928000  |
| H | -0.326691000 | 4.582725000  | 0.153165000  |
| H | -0.364075000 | 2.940012000  | 0.772620000  |

|    |              |              |              |
|----|--------------|--------------|--------------|
| C  | -1.467984000 | 4.259242000  | -2.249920000 |
| H  | -0.594468000 | 4.924173000  | -2.216537000 |
| H  | -1.439003000 | 3.771786000  | -3.234085000 |
| C  | 3.543280000  | 2.030598000  | -1.036497000 |
| H  | 2.985380000  | 2.017767000  | -1.980366000 |
| C  | 4.803143000  | 2.876880000  | -1.346553000 |
| H  | 5.516078000  | 2.257076000  | -1.905256000 |
| H  | 4.485836000  | 3.664908000  | -2.041280000 |
| C  | 2.598221000  | 2.697168000  | -0.002627000 |
| H  | 1.574522000  | 2.376722000  | -0.212374000 |
| H  | 2.619956000  | 3.781754000  | -0.174176000 |
| C  | 1.984560000  | -2.823271000 | -0.869402000 |
| H  | 1.265686000  | -2.350843000 | -1.546489000 |
| C  | 2.502971000  | -4.041148000 | -1.679100000 |
| H  | 3.190047000  | -3.676656000 | -2.453241000 |
| H  | 1.632385000  | -4.446619000 | -2.212020000 |
| C  | 1.155626000  | -3.222322000 | 0.377975000  |
| H  | 0.390960000  | -2.449909000 | 0.535079000  |
| H  | 0.611000000  | -4.144211000 | 0.136966000  |
| C  | -2.151665000 | -1.779249000 | -1.956753000 |
| H  | -1.058241000 | -1.750795000 | -1.898586000 |
| C  | -2.478412000 | -2.177802000 | -3.413757000 |
| H  | -1.918280000 | -3.091520000 | -3.646826000 |
| H  | -2.079608000 | -1.401864000 | -4.079995000 |
| C  | -2.586644000 | -2.813662000 | -0.903425000 |
| H  | -2.210774000 | -2.473480000 | 0.068995000  |
| H  | -3.678288000 | -2.848882000 | -0.806696000 |
| C  | -1.503614000 | -0.568849000 | 2.555476000  |
| C  | -2.809235000 | -0.274409000 | 2.138966000  |
| C  | -1.187022000 | -1.809387000 | 3.123942000  |
| C  | -3.778532000 | -1.270367000 | 2.215523000  |
| H  | -3.047393000 | 0.703934000  | 1.734415000  |
| C  | -2.172836000 | -2.790804000 | 3.184484000  |
| H  | -0.185002000 | -1.995419000 | 3.494780000  |
| C  | -3.466249000 | -2.526394000 | 2.733658000  |
| H  | -4.783439000 | -1.059990000 | 1.860095000  |
| H  | -1.929146000 | -3.765770000 | 3.597684000  |
| H  | -4.230547000 | -3.295091000 | 2.794796000  |
| Pd | -0.249358000 | -0.043993000 | 1.085918000  |
| Br | -0.306450000 | 1.161093000  | 3.344516000  |
| C  | -3.955668000 | -2.401556000 | -3.732754000 |
| H  | -4.534422000 | -1.479319000 | -3.621609000 |
| H  | -4.076495000 | -2.746564000 | -4.764840000 |
| H  | -4.398148000 | -3.160073000 | -3.076809000 |
| C  | -2.064439000 | -4.219959000 | -1.191365000 |
| H  | -0.991546000 | -4.201249000 | -1.417590000 |
| H  | -2.210528000 | -4.869974000 | -0.322739000 |
| H  | -2.575032000 | -4.681285000 | -2.044066000 |
| C  | 1.899133000  | -3.405555000 | 1.699314000  |
| H  | 1.194944000  | -3.740767000 | 2.468415000  |
| H  | 2.699416000  | -4.150442000 | 1.637431000  |
| H  | 2.338949000  | -2.461917000 | 2.037882000  |
| C  | 3.152760000  | -5.210209000 | -0.934520000 |
| H  | 2.481949000  | -5.623001000 | -0.174297000 |
| H  | 3.379236000  | -6.014452000 | -1.642814000 |
| H  | 4.092411000  | -4.940017000 | -0.445480000 |
| C  | 5.525704000  | 3.572245000  | -0.187692000 |
| H  | 5.910874000  | 2.876451000  | 0.563218000  |
| H  | 6.376107000  | 4.143984000  | -0.574463000 |
| H  | 4.864793000  | 4.274815000  | 0.329368000  |
| C  | 2.877246000  | 2.383574000  | 1.466272000  |
| H  | 2.690278000  | 1.325663000  | 1.675907000  |
| H  | 3.906366000  | 2.613724000  | 1.759791000  |
| H  | 2.200816000  | 2.959641000  | 2.105526000  |
| C  | -2.728830000 | 5.120337000  | -2.173471000 |
| H  | -2.702273000 | 5.883969000  | -2.958269000 |
| H  | -3.638267000 | 4.531756000  | -2.325418000 |
| H  | -2.811175000 | 5.640347000  | -1.214251000 |
| C  | -2.143921000 | 4.021151000  | 1.170907000  |
| H  | -1.760626000 | 4.424402000  | 2.113754000  |

|   |              |             |             |
|---|--------------|-------------|-------------|
| H | -2.835348000 | 4.758492000 | 0.749700000 |
| H | -2.712659000 | 3.120387000 | 1.419823000 |

Zero-point correction = 0.907670 (Hartree/Particle)  
 Thermal correction to Energy = 0.955720  
 Thermal correction to Enthalpy = 0.956664  
 Thermal correction to Gibbs Free Energy = 0.824126  
 Sum of electronic and zero-point Energies = -4402.987926  
 Sum of electronic and thermal Energies = -4402.939876  
 Sum of electronic and thermal Enthalpies = -4402.938932  
 Sum of electronic and thermal Free Energies = -4403.071470  
 E(RM06L) = -4408.66859801

### TS\_OA\_IPent\_PhCl

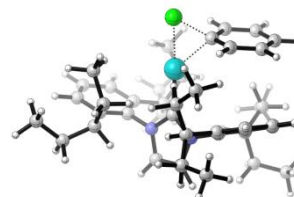

|   |              |              |              |
|---|--------------|--------------|--------------|
| C | 0.357584000  | 0.145627000  | -0.669858000 |
| C | 1.205561000  | 0.104160000  | -2.782677000 |
| C | -0.118250000 | 0.355267000  | -2.886357000 |
| N | -0.614436000 | 0.373645000  | -1.592916000 |
| N | 1.474464000  | -0.018381000 | -1.427840000 |
| H | -0.750107000 | 0.522903000  | -3.743711000 |
| H | 1.977180000  | 0.003975000  | -3.529238000 |
| C | -1.997337000 | 0.542975000  | -1.259102000 |
| C | -2.459752000 | 1.823165000  | -0.920571000 |
| C | -2.812636000 | -0.597997000 | -1.278478000 |
| C | -3.821182000 | 1.941694000  | -0.623795000 |
| C | -4.158679000 | -0.424018000 | -0.955503000 |
| C | -4.658806000 | 0.834058000  | -0.645734000 |
| H | -4.233184000 | 2.911721000  | -0.372887000 |
| H | -4.823819000 | -1.281070000 | -0.938715000 |
| H | -5.712186000 | 0.952425000  | -0.408024000 |
| C | 2.773740000  | -0.296127000 | -0.887013000 |
| C | 3.096383000  | -1.628755000 | -0.584942000 |
| C | 3.658953000  | 0.778711000  | -0.702243000 |
| C | 4.370290000  | -1.863813000 | -0.063158000 |
| C | 4.920456000  | 0.479504000  | -0.188146000 |
| C | 5.270369000  | -0.825822000 | 0.131404000  |
| H | 4.663258000  | -2.872261000 | 0.199691000  |
| H | 5.639671000  | 1.274005000  | -0.030485000 |
| H | 6.254849000  | -1.035252000 | 0.539377000  |
| C | -1.512044000 | 3.010818000  | -0.879922000 |
| H | -0.521877000 | 2.618417000  | -1.129407000 |
| C | -1.294521000 | 3.586732000  | 0.539962000  |
| H | -0.512904000 | 4.353327000  | 0.447930000  |
| H | -0.850874000 | 2.779601000  | 1.139790000  |
| C | -1.769877000 | 4.057454000  | -1.991563000 |
| H | -1.037755000 | 4.862214000  | -1.841640000 |
| H | -1.506033000 | 3.585751000  | -2.948072000 |
| C | 3.242298000  | 2.206628000  | -1.031287000 |
| H | 2.517401000  | 2.133293000  | -1.849540000 |
| C | 4.380003000  | 3.091518000  | -1.605275000 |
| H | 5.024949000  | 2.467286000  | -2.236809000 |
| H | 3.903427000  | 3.811606000  | -2.282779000 |
| C | 2.468285000  | 2.870398000  | 0.137080000  |
| H | 1.452339000  | 2.460573000  | 0.149909000  |
| H | 2.367990000  | 3.941022000  | -0.087702000 |
| C | 2.103571000  | -2.760011000 | -0.820085000 |
| H | 1.366950000  | -2.374842000 | -1.533425000 |
| C | 2.712417000  | -3.993496000 | -1.539946000 |
| H | 3.426451000  | -3.640833000 | -2.294839000 |
| H | 1.889324000  | -4.461174000 | -2.096520000 |
| C | 1.290720000  | -3.132131000 | 0.447630000  |

|    |              |              |              |
|----|--------------|--------------|--------------|
| H  | 0.483697000  | -2.399295000 | 0.564770000  |
| H  | 0.808489000  | -4.101201000 | 0.263862000  |
| C  | -2.249040000 | -1.957898000 | -1.659757000 |
| H  | -1.158078000 | -1.889824000 | -1.585761000 |
| C  | -2.550009000 | -2.307701000 | -3.135778000 |
| H  | -1.936283000 | -3.174401000 | -3.410470000 |
| H  | -2.199884000 | -1.480775000 | -3.766154000 |
| C  | -2.654037000 | -3.054285000 | -0.662339000 |
| H  | -2.324091000 | -2.728926000 | 0.329289000  |
| H  | -3.744664000 | -3.154876000 | -0.601811000 |
| C  | -1.304973000 | -0.375699000 | 2.786918000  |
| C  | -2.476335000 | 0.357699000  | 2.562357000  |
| C  | -1.355507000 | -1.760705000 | 2.990816000  |
| C  | -3.686157000 | -0.318363000 | 2.464802000  |
| H  | -2.429630000 | 1.435105000  | 2.455781000  |
| C  | -2.580499000 | -2.412492000 | 2.896459000  |
| H  | -0.446533000 | -2.305330000 | 3.218876000  |
| C  | -3.748772000 | -1.700687000 | 2.630509000  |
| H  | -4.589548000 | 0.247429000  | 2.259232000  |
| H  | -2.618302000 | -3.489593000 | 3.035784000  |
| H  | -4.700996000 | -2.217242000 | 2.562364000  |
| Cl | 0.140134000  | 0.548141000  | 3.761087000  |
| Pd | 0.221361000  | 0.204125000  | 1.398405000  |
| C  | 5.247427000  | 3.905108000  | -0.639467000 |
| H  | 5.825560000  | 3.286123000  | 0.052602000  |
| H  | 5.959867000  | 4.511168000  | -1.209542000 |
| H  | 4.640575000  | 4.589898000  | -0.038962000 |
| C  | 3.045752000  | 2.672778000  | 1.537970000  |
| H  | 4.080551000  | 3.017880000  | 1.626886000  |
| H  | 2.440121000  | 3.220061000  | 2.268003000  |
| H  | 3.013808000  | 1.615349000  | 1.820044000  |
| C  | -2.468785000 | 4.179770000  | 1.317613000  |
| H  | -2.112293000 | 4.551472000  | 2.284423000  |
| H  | -2.937923000 | 5.021206000  | 0.797865000  |
| H  | -3.242580000 | 3.433960000  | 1.524058000  |
| C  | -3.161703000 | 4.672474000  | -2.148336000 |
| H  | -3.512442000 | 5.158885000  | -1.233485000 |
| H  | -3.141261000 | 5.432851000  | -2.936469000 |
| H  | -3.902528000 | 3.920956000  | -2.437072000 |
| C  | 3.363018000  | -5.100531000 | -0.705101000 |
| H  | 3.660533000  | -5.925456000 | -1.361552000 |
| H  | 4.261032000  | -4.773549000 | -0.173916000 |
| H  | 2.666725000  | -5.506414000 | 0.035625000  |
| C  | 2.064818000  | -3.182238000 | 1.764289000  |
| H  | 1.417930000  | -3.561185000 | 2.563090000  |
| H  | 2.943110000  | -3.834552000 | 1.716743000  |
| H  | 2.399555000  | -2.180629000 | 2.054084000  |
| C  | -2.041420000 | -4.415961000 | -0.986498000 |
| H  | -0.961507000 | -4.328238000 | -1.156183000 |
| H  | -2.192394000 | -5.116718000 | -0.158827000 |
| H  | -2.484112000 | -4.863348000 | -1.883476000 |
| C  | -4.011568000 | -2.603419000 | -3.467252000 |
| H  | -4.649840000 | -1.734355000 | -3.278750000 |
| H  | -4.118007000 | -2.869276000 | -4.524074000 |
| H  | -4.397329000 | -3.441173000 | -2.875364000 |

Zero-point correction = 0.907530 (Hartree/Particle)  
 Thermal correction to Energy = 0.955459  
 Thermal correction to Enthalpy = 0.956403  
 Thermal correction to Gibbs Free Energy = 0.825317  
 Sum of electronic and zero-point Energies = -2291.720744  
 Sum of electronic and thermal Energies = -2291.672814  
 Sum of electronic and thermal Enthalpies = -2291.671870  
 Sum of electronic and thermal Free Energies = -2291.802956  
 E(RM06L) = -2294.80526422

### TS\_OA\_IPent\_PhOTf

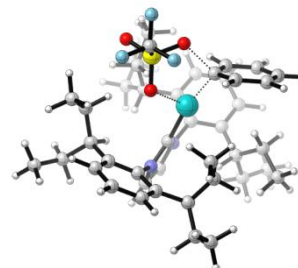

|    |              |              |              |
|----|--------------|--------------|--------------|
| C  | 2.418536000  | -0.870923000 | -4.139174000 |
| C  | 0.063821000  | -0.506923000 | -3.670672000 |
| C  | 0.246524000  | -1.238443000 | -2.487528000 |
| C  | 1.451132000  | -1.880674000 | -2.162218000 |
| H  | 1.509679000  | -2.586672000 | -1.339021000 |
| Pd | 0.099209000  | -0.318920000 | -0.777772000 |
| H  | -0.908393000 | -0.093033000 | -3.911031000 |
| C  | 2.551570000  | -1.658202000 | -3.006564000 |
| C  | 1.178090000  | -0.298003000 | -4.466565000 |
| H  | 3.499497000  | -2.132201000 | -2.770803000 |
| H  | 1.085048000  | 0.314891000  | -5.358734000 |
| O  | -1.256494000 | -2.452347000 | -2.294773000 |
| S  | -2.385108000 | -2.053863000 | -1.374719000 |
| O  | -2.769846000 | -3.081996000 | -0.423483000 |
| O  | -2.206563000 | -0.681869000 | -0.847152000 |
| C  | -3.789156000 | -1.856542000 | -2.550681000 |
| F  | -4.867795000 | -1.441386000 | -1.893574000 |
| F  | -4.060649000 | -3.009401000 | -3.149607000 |
| F  | -3.474267000 | -0.950631000 | -3.476928000 |
| H  | 3.270793000  | -0.711956000 | -4.792413000 |
| C  | 0.590842000  | 0.675032000  | 1.030550000  |
| N  | 1.713619000  | 0.391383000  | 1.739396000  |
| N  | 0.008280000  | 1.670765000  | 1.738969000  |
| C  | 1.831548000  | 1.189169000  | 2.863863000  |
| C  | 2.643501000  | -0.604231000 | 1.292460000  |
| C  | 0.747277000  | 1.999731000  | 2.865455000  |
| C  | -1.277963000 | 2.220162000  | 1.413711000  |
| H  | 2.661299000  | 1.102882000  | 3.547051000  |
| C  | 3.671244000  | -0.193732000 | 0.431290000  |
| C  | 2.411952000  | -1.944254000 | 1.644125000  |
| H  | 0.425882000  | 2.764168000  | 3.554669000  |
| C  | -2.410384000 | 1.623304000  | 1.991574000  |
| C  | -1.336417000 | 3.309294000  | 0.530968000  |
| C  | 4.519034000  | -1.184138000 | -0.066964000 |
| C  | 3.827783000  | 1.263912000  | 0.029758000  |
| C  | 3.289856000  | -2.893744000 | 1.111711000  |
| C  | 1.219722000  | -2.336154000 | 2.501861000  |
| C  | -3.651040000 | 2.172077000  | 1.656334000  |
| C  | -2.285089000 | 0.445259000  | 2.944889000  |
| C  | -2.602525000 | 3.820231000  | 0.243494000  |
| C  | -0.076024000 | 3.886153000  | -0.098629000 |
| C  | 4.332488000  | -2.517672000 | 0.273552000  |
| H  | 5.318084000  | -0.914735000 | -0.749682000 |
| H  | 2.918182000  | 1.788467000  | 0.340857000  |
| C  | 3.884595000  | 1.426700000  | -1.499887000 |
| C  | 4.980249000  | 1.957478000  | 0.791015000  |
| H  | 3.145877000  | -3.942675000 | 1.339070000  |
| H  | 0.737562000  | -1.401198000 | 2.804095000  |
| C  | 1.582783000  | -2.996465000 | 3.854369000  |
| C  | 0.106437000  | -3.046763000 | 1.692712000  |
| C  | -3.744493000 | 3.258370000  | 0.797580000  |
| H  | -4.555758000 | 1.737090000  | 2.061670000  |
| H  | -1.216770000 | 0.223744000  | 3.027739000  |
| C  | -2.675481000 | 0.794254000  | 4.402101000  |
| C  | -2.878498000 | -0.880034000 | 2.404618000  |
| H  | -2.701309000 | 4.661870000  | -0.430785000 |
| H  | 0.743935000  | 3.652090000  | 0.590143000  |
| C  | -0.065423000 | 5.434842000  | -0.201842000 |



|   |              |              |              |
|---|--------------|--------------|--------------|
| C | 0.290085000  | 3.183652000  | -1.432812000 |
| H | 4.998408000  | -3.275757000 | -0.128795000 |
| H | 4.713496000  | 0.850699000  | -1.928741000 |
| H | 2.967819000  | 0.987999000  | -1.912870000 |
| H | 4.889807000  | 3.037623000  | 0.624379000  |
| H | 4.818996000  | 1.804091000  | 1.866033000  |
| H | 0.629697000  | -3.234190000 | 4.344787000  |
| H | 2.057399000  | -2.226679000 | 4.477911000  |
| H | -0.748995000 | -3.170478000 | 2.368715000  |
| H | -0.229117000 | -2.334305000 | 0.926886000  |
| H | -4.719683000 | 3.668833000  | 0.552850000  |
| H | -2.041622000 | 1.632402000  | 4.724185000  |
| H | -2.374471000 | -0.065311000 | 5.016109000  |
| H | -2.204842000 | -1.235882000 | 1.620558000  |
| H | -2.811987000 | -1.610270000 | 3.223642000  |
| H | -0.564591000 | 5.848046000  | 0.683417000  |
| H | 0.985138000  | 5.744545000  | -0.127354000 |
| H | 0.796146000  | 2.239271000  | -1.198209000 |
| H | 1.032307000  | 3.804783000  | -1.950323000 |
| C | -4.288084000 | -0.911945000 | 1.815359000  |
| H | -4.522092000 | -1.940345000 | 1.523970000  |
| H | -5.059382000 | -0.574315000 | 2.515805000  |
| H | -4.347530000 | -0.303421000 | 0.909198000  |
| C | -4.129213000 | 1.133641000  | 4.729680000  |
| H | -4.810975000 | 0.328102000  | 4.441589000  |
| H | -4.239751000 | 1.286736000  | 5.808770000  |
| H | -4.455695000 | 2.053707000  | 4.236540000  |
| C | -0.867007000 | 2.867376000  | -2.379810000 |
| H | -1.446516000 | 3.757092000  | -2.646958000 |
| H | -0.474203000 | 2.428460000  | -3.303103000 |
| H | -1.553662000 | 2.140215000  | -1.933394000 |

|   |              |              |              |
|---|--------------|--------------|--------------|
| C | -0.632071000 | 6.099368000  | -1.460827000 |
| H | -0.491481000 | 7.183615000  | -1.395195000 |
| H | -0.115806000 | 5.756749000  | -2.363130000 |
| H | -1.700892000 | 5.919532000  | -1.605873000 |
| C | 4.002722000  | 2.883061000  | -1.945892000 |
| H | 3.840880000  | 2.971451000  | -3.024942000 |
| H | 3.255157000  | 3.509039000  | -1.444617000 |
| H | 4.990668000  | 3.300714000  | -1.722272000 |
| C | 6.396074000  | 1.513178000  | 0.427392000  |
| H | 7.134055000  | 2.105670000  | 0.977819000  |
| H | 6.565767000  | 0.460877000  | 0.675332000  |
| H | 6.596636000  | 1.646392000  | -0.641892000 |
| C | 0.379235000  | -4.379921000 | 1.001129000  |
| H | 0.641238000  | -5.174330000 | 1.707264000  |
| H | -0.525826000 | -4.687647000 | 0.468803000  |
| H | 1.181337000  | -4.305488000 | 0.259788000  |
| C | 2.477193000  | -4.237077000 | 3.887251000  |
| H | 2.533920000  | -4.621477000 | 4.911404000  |
| H | 2.097695000  | -5.044946000 | 3.255205000  |
| H | 3.498856000  | -4.007417000 | 3.570179000  |

Zero-point correction = 0.936096 (Hartree/Particle)  
 Thermal correction to Energy = 0.990676  
 Thermal correction to Enthalpy = 0.991620  
 Thermal correction to Gibbs Free Energy = 0.844305  
 Sum of electronic and zero-point Energies = -2792.739211  
 Sum of electronic and thermal Energies = -2792.684631  
 Sum of electronic and thermal Enthalpies = -2792.683687  
 Sum of electronic and thermal Free Energies = -2792.831002  
 E(RM06L) = -2796.24147752

## 6. NMR spectra

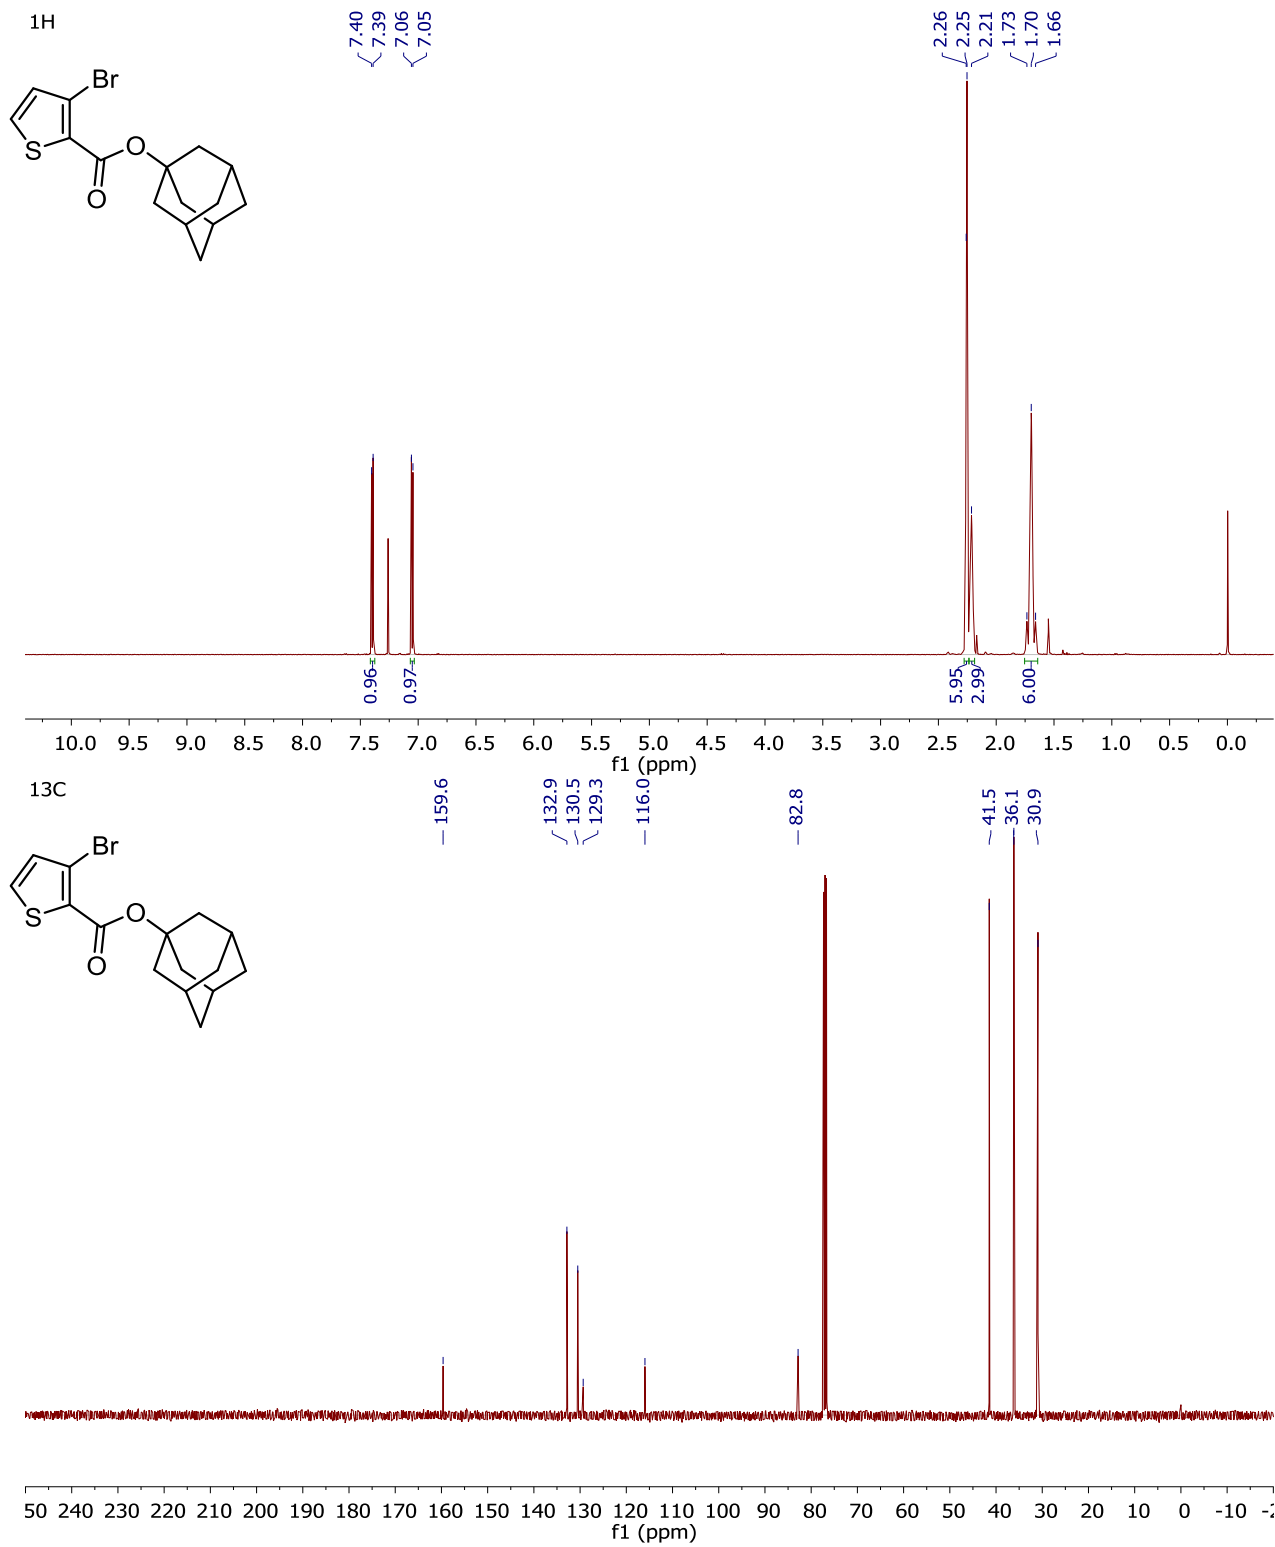

<sup>1</sup>H

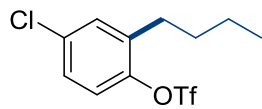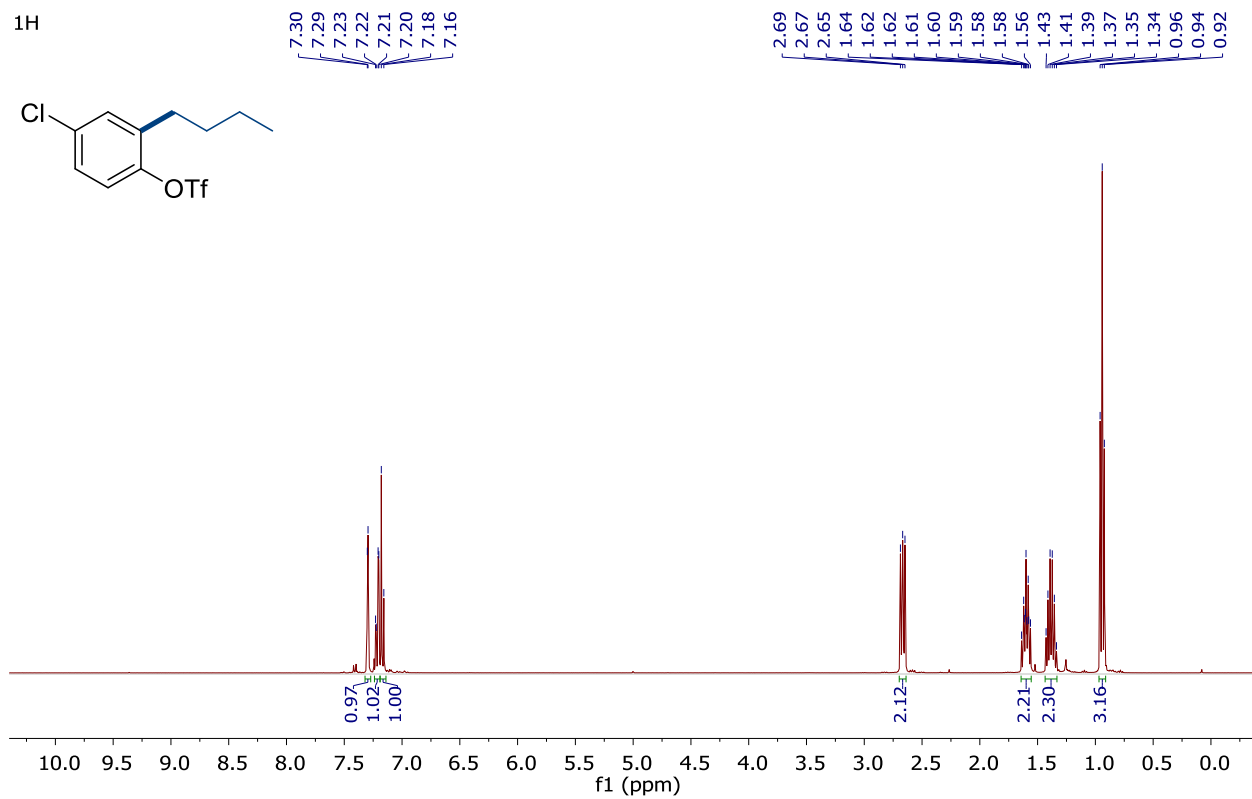

<sup>13</sup>C

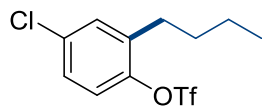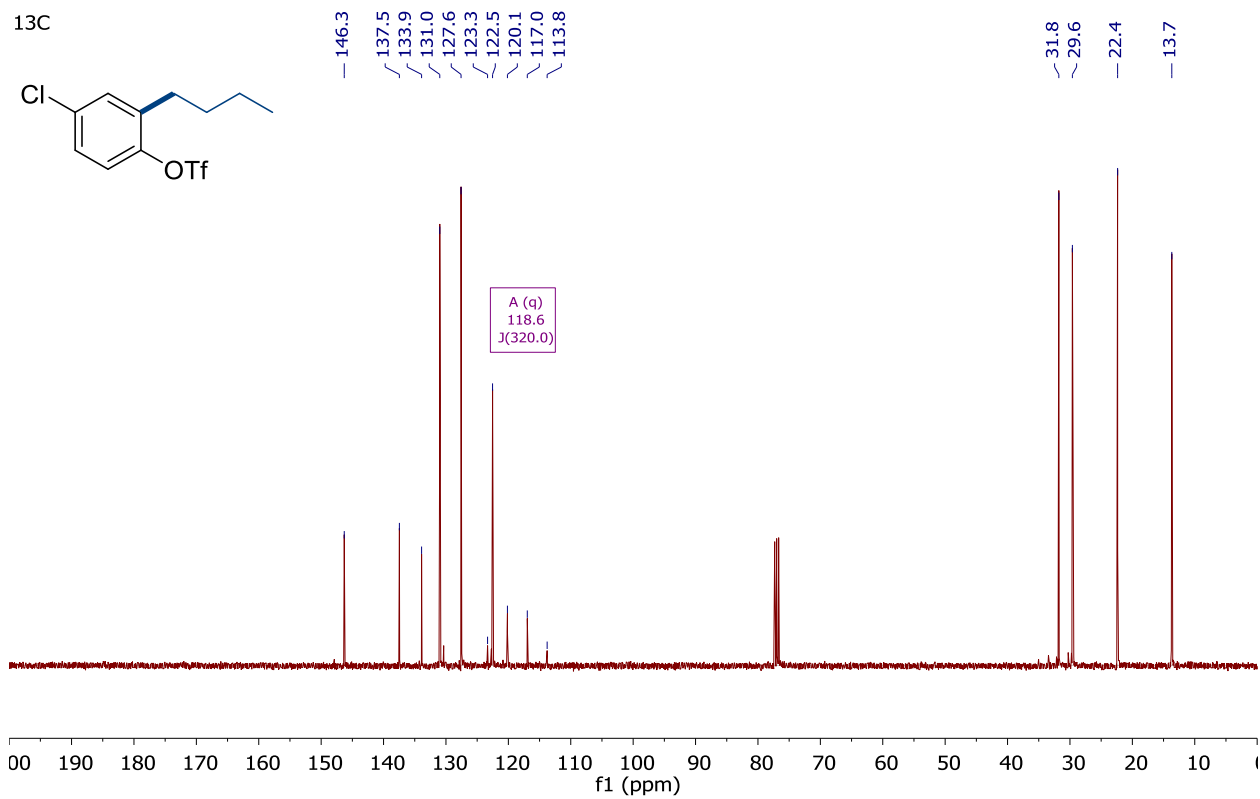

19F

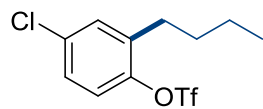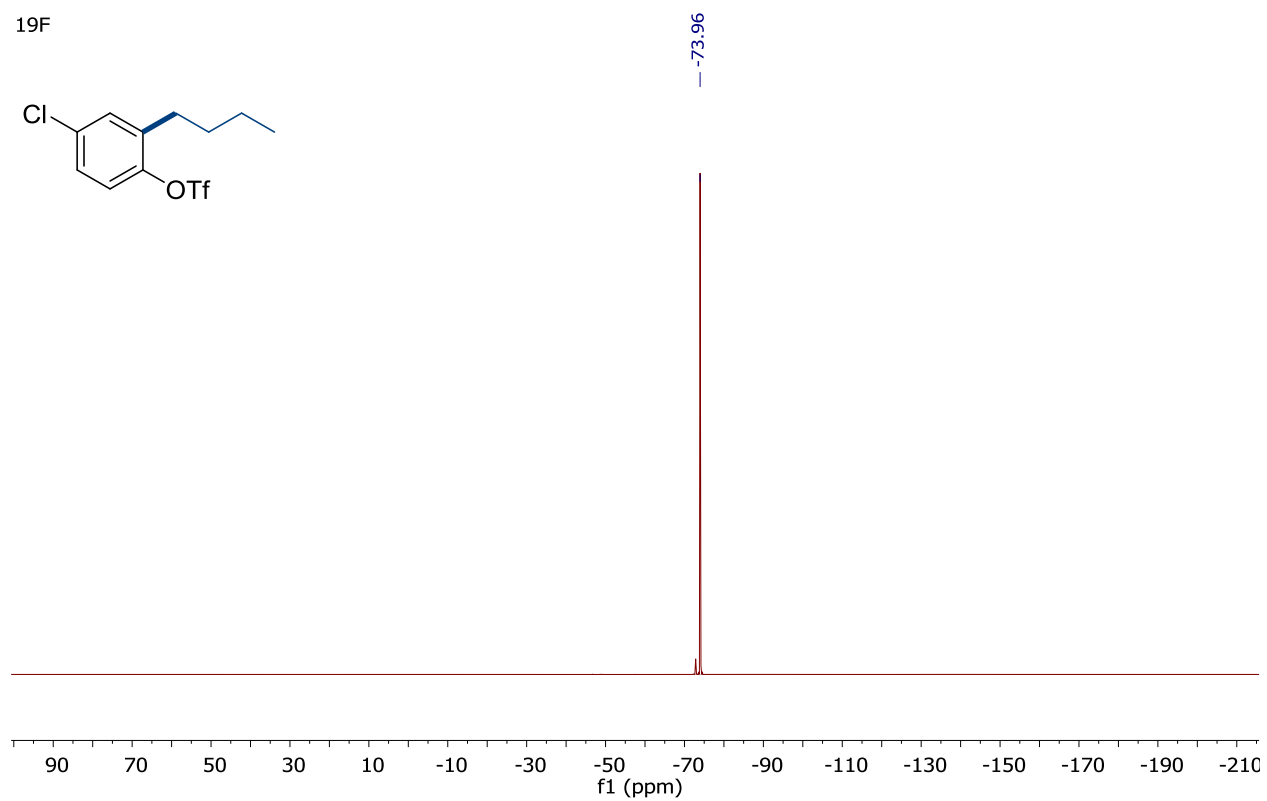

$^1\text{H}$

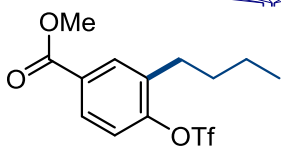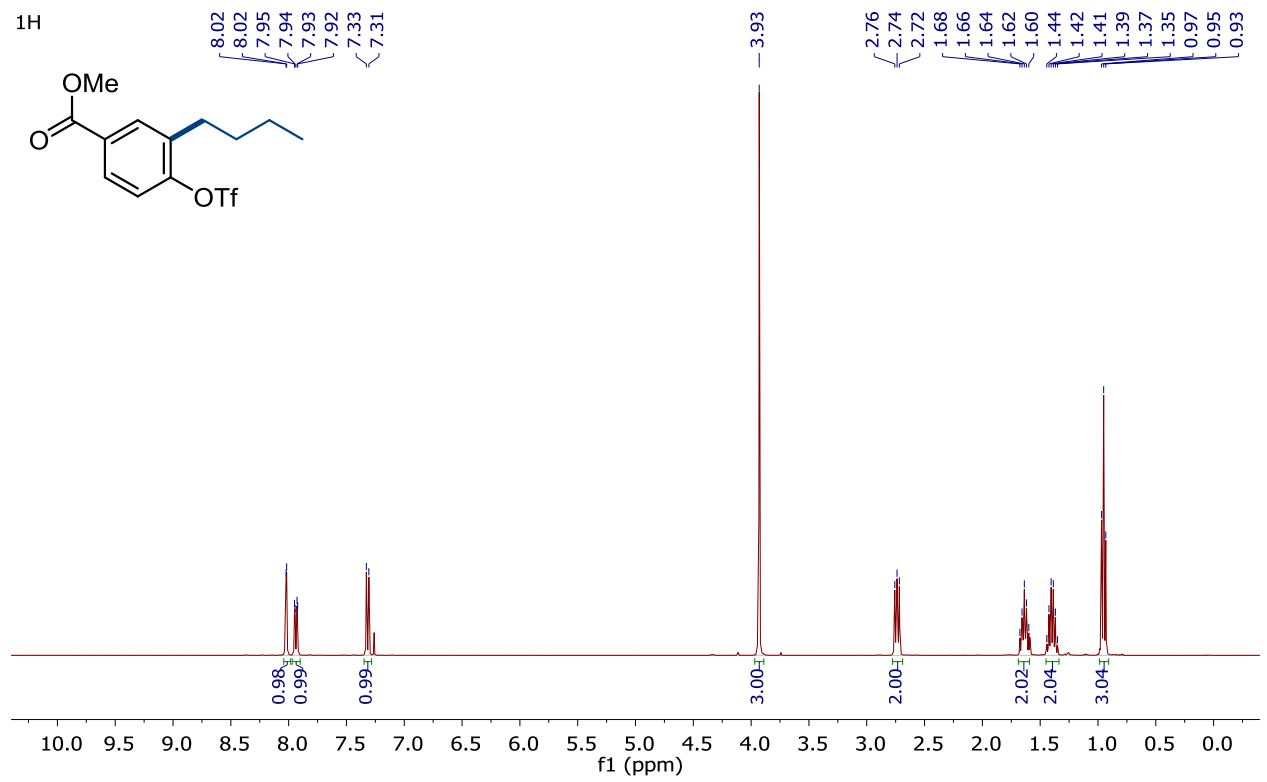

13C

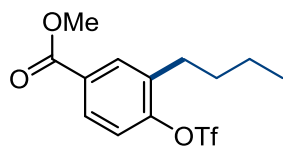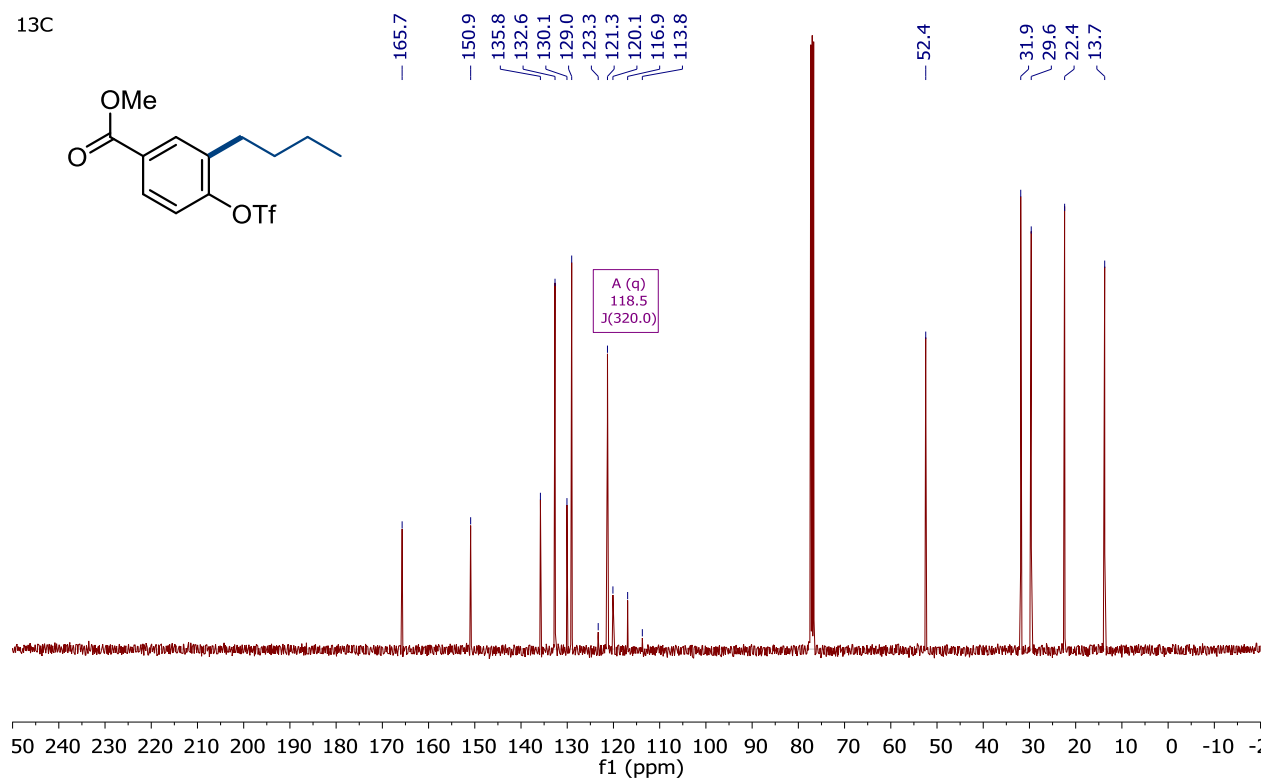

19F

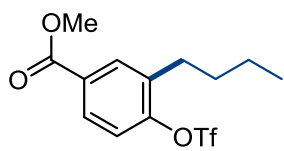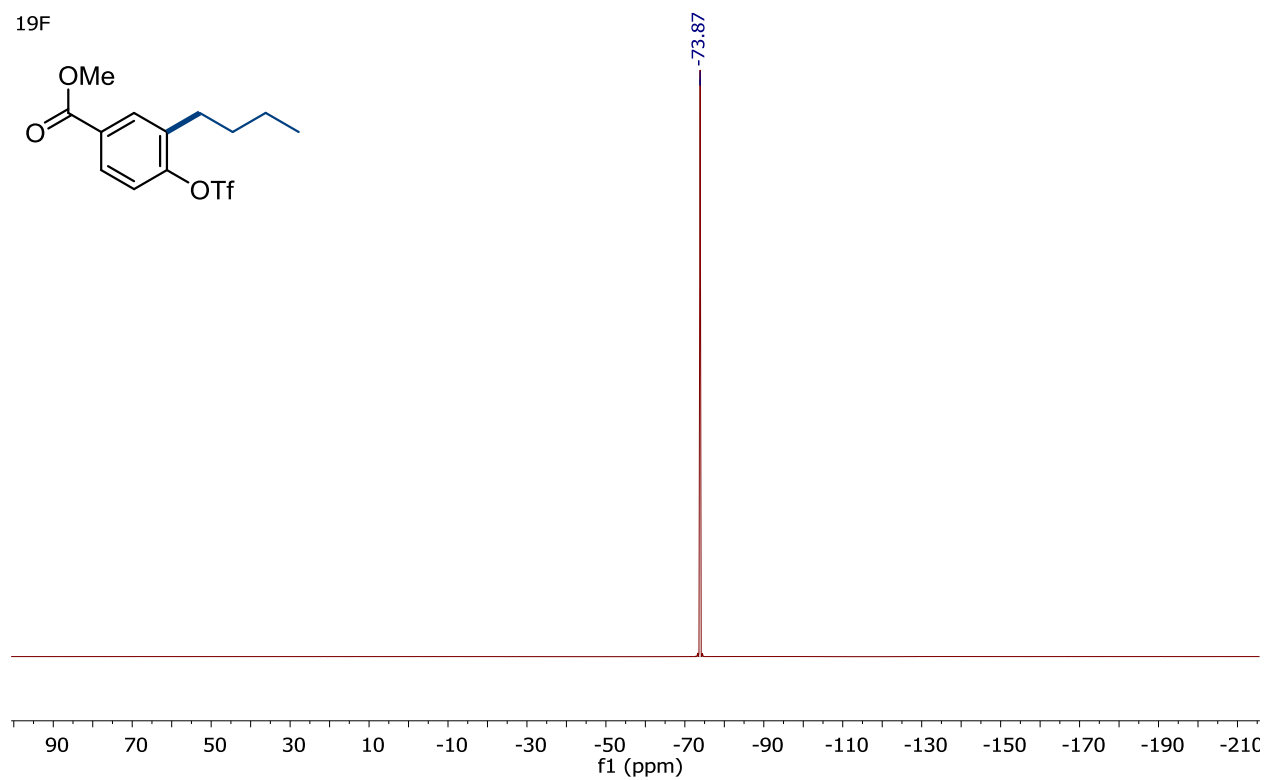

1H

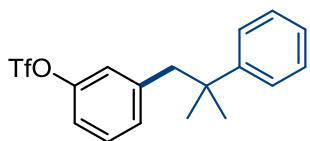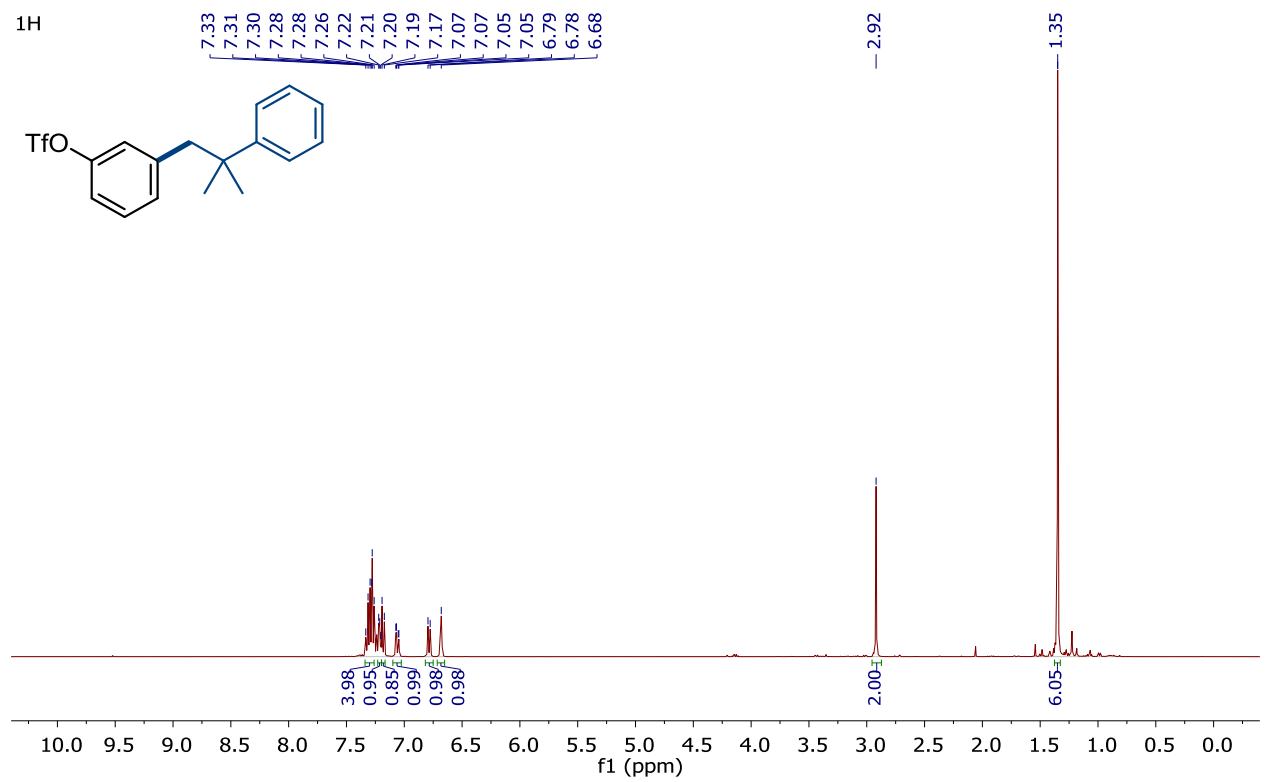

13C

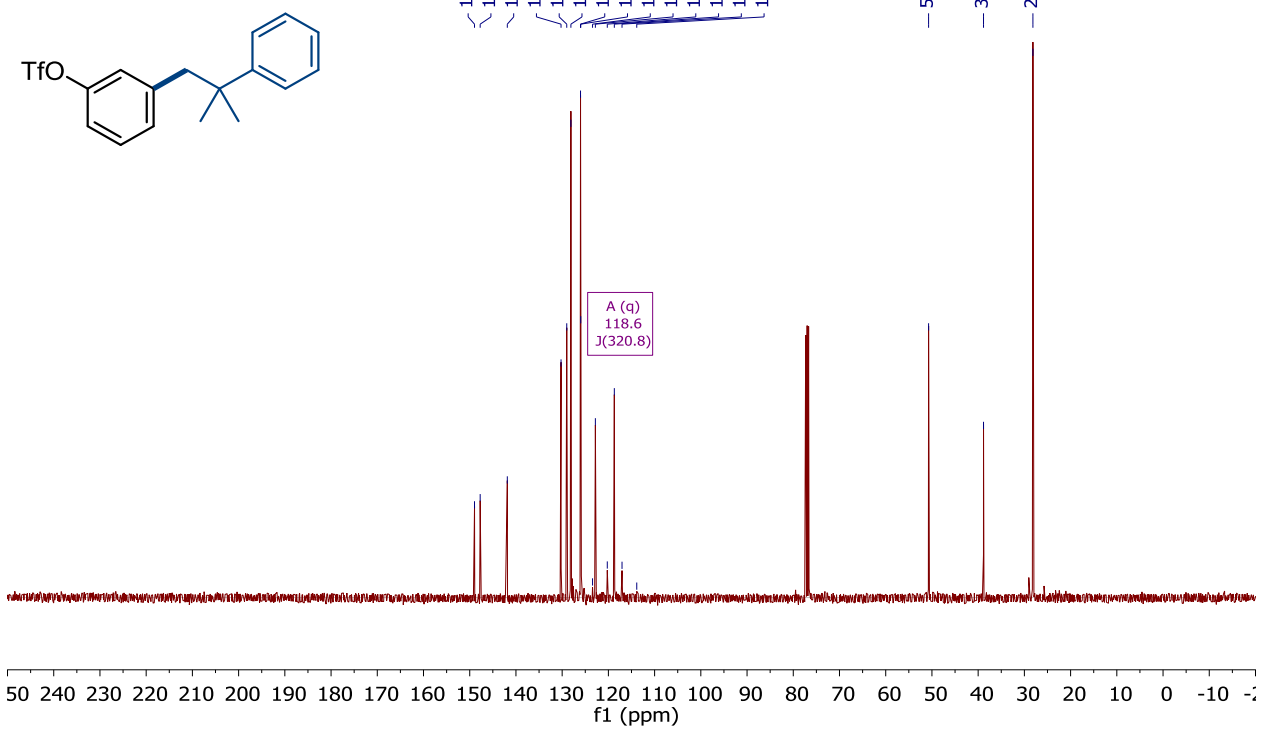

19F

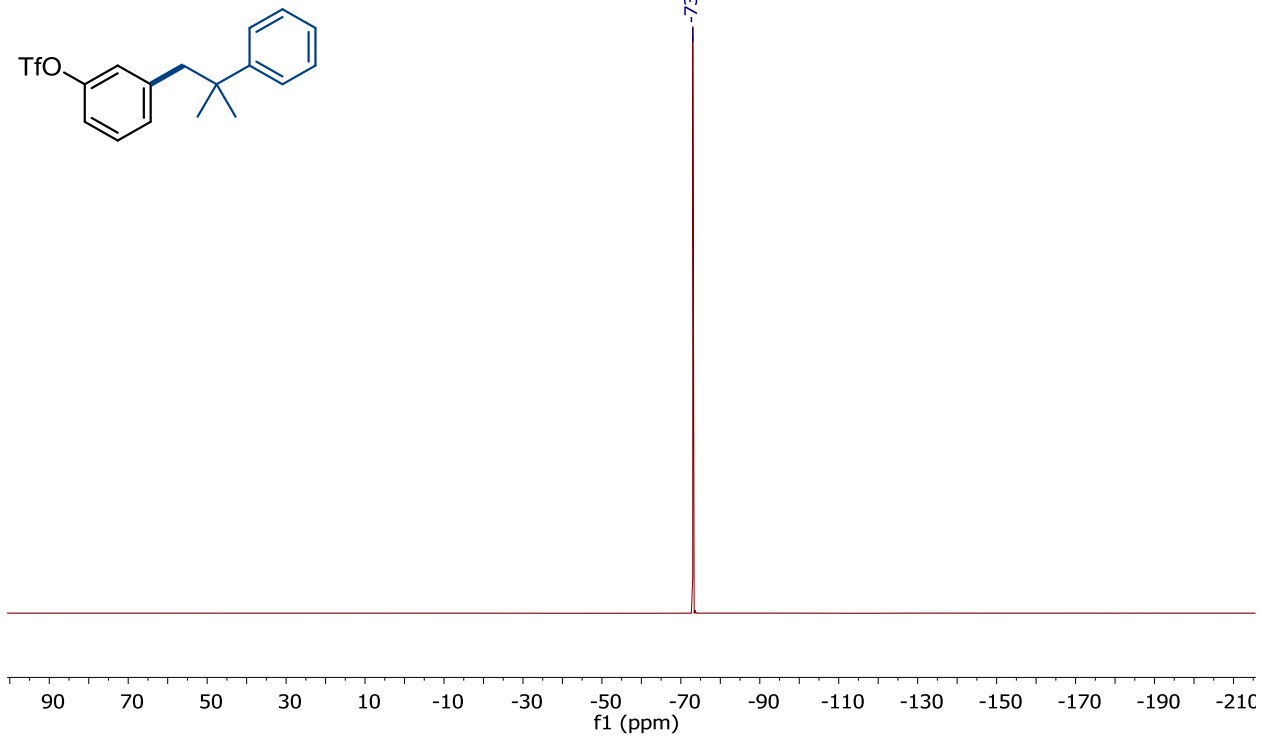

<sup>1</sup>H

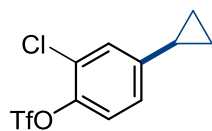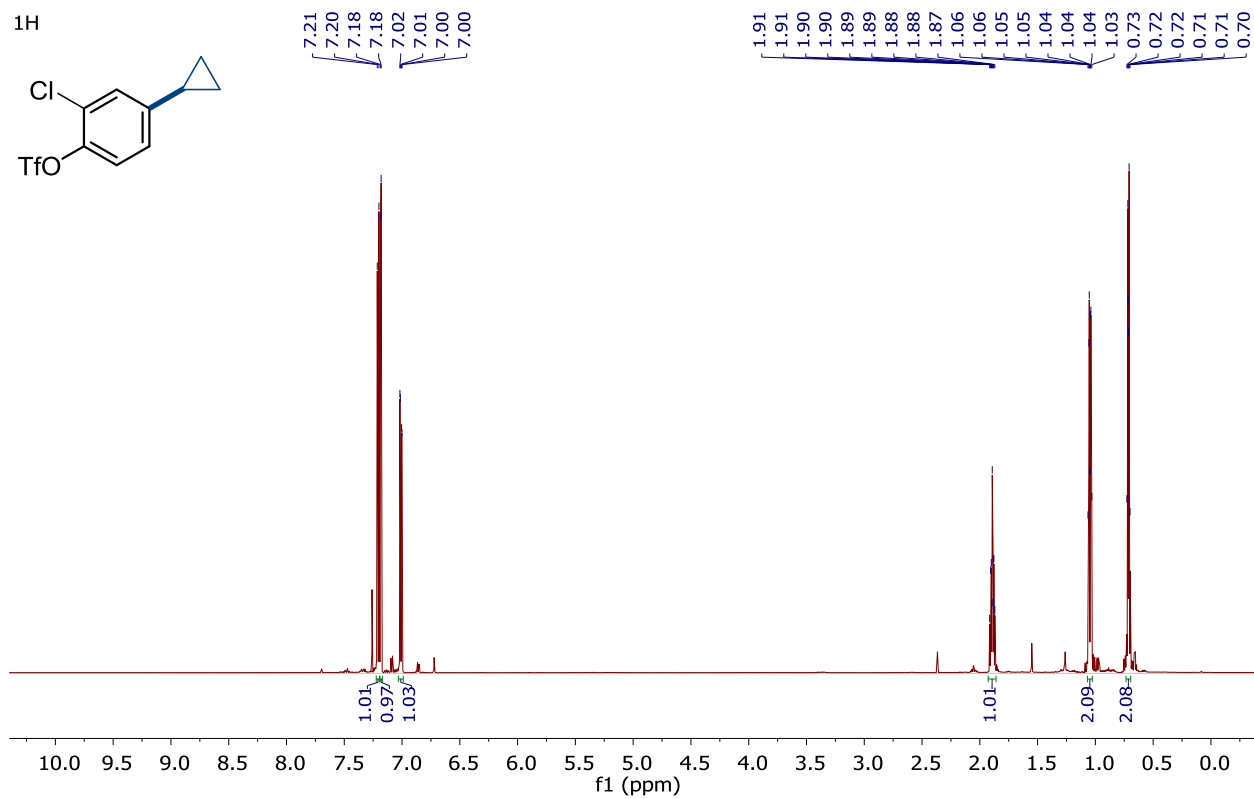

<sup>13</sup>C

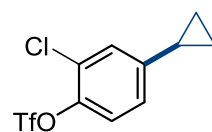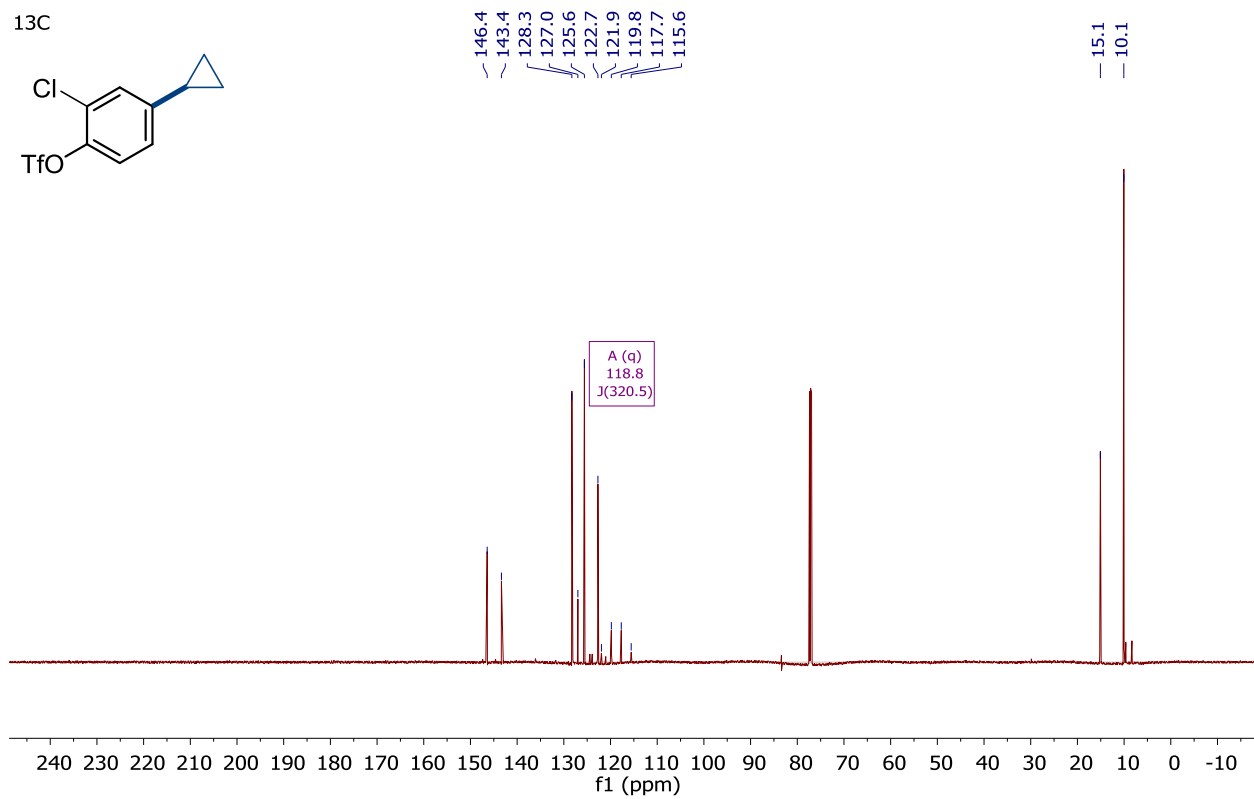



19F

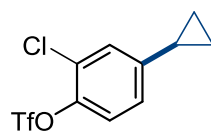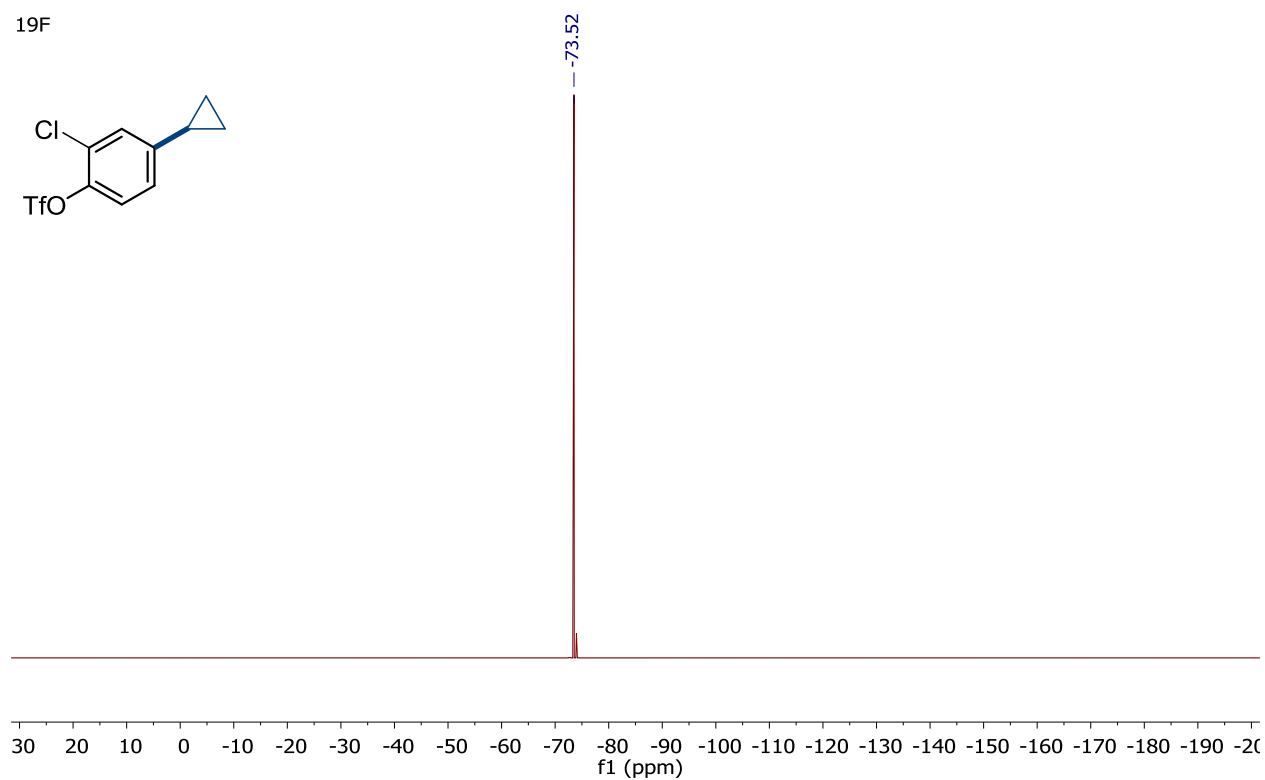

<sup>1</sup>H

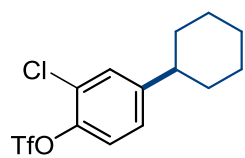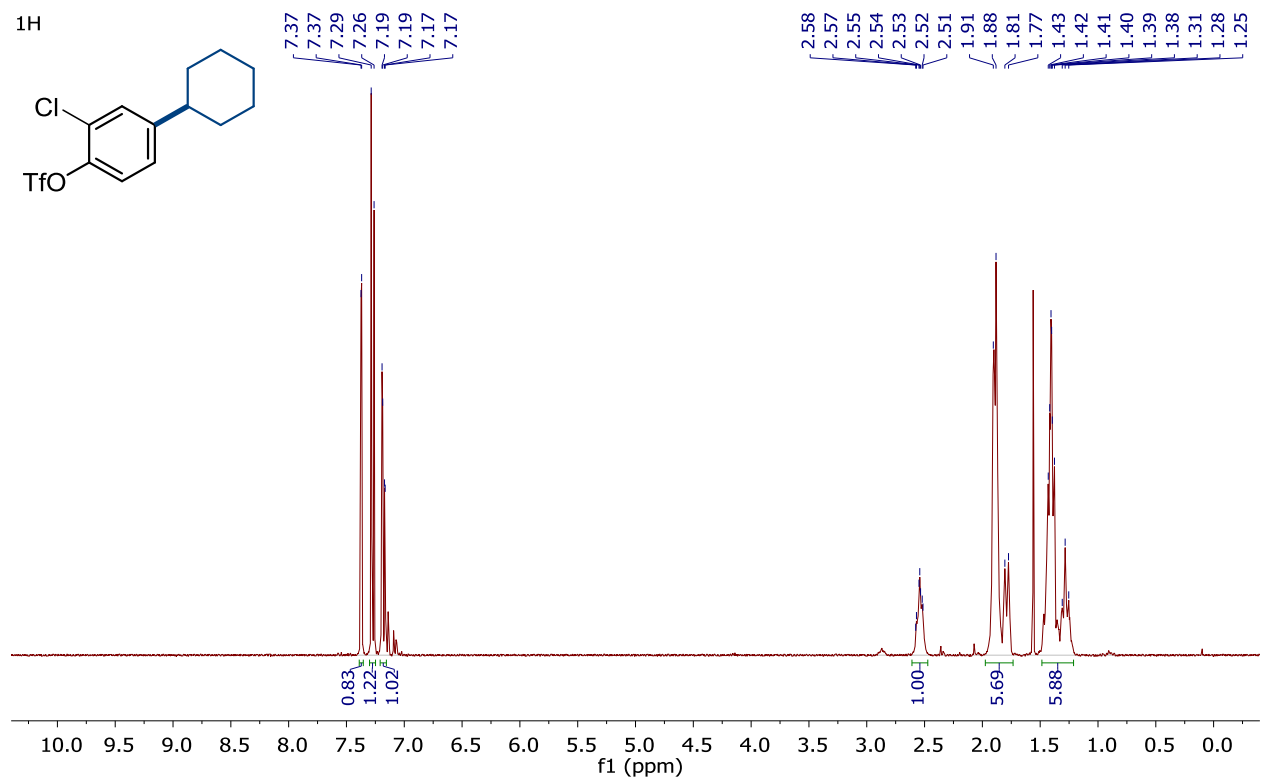

13C

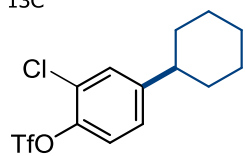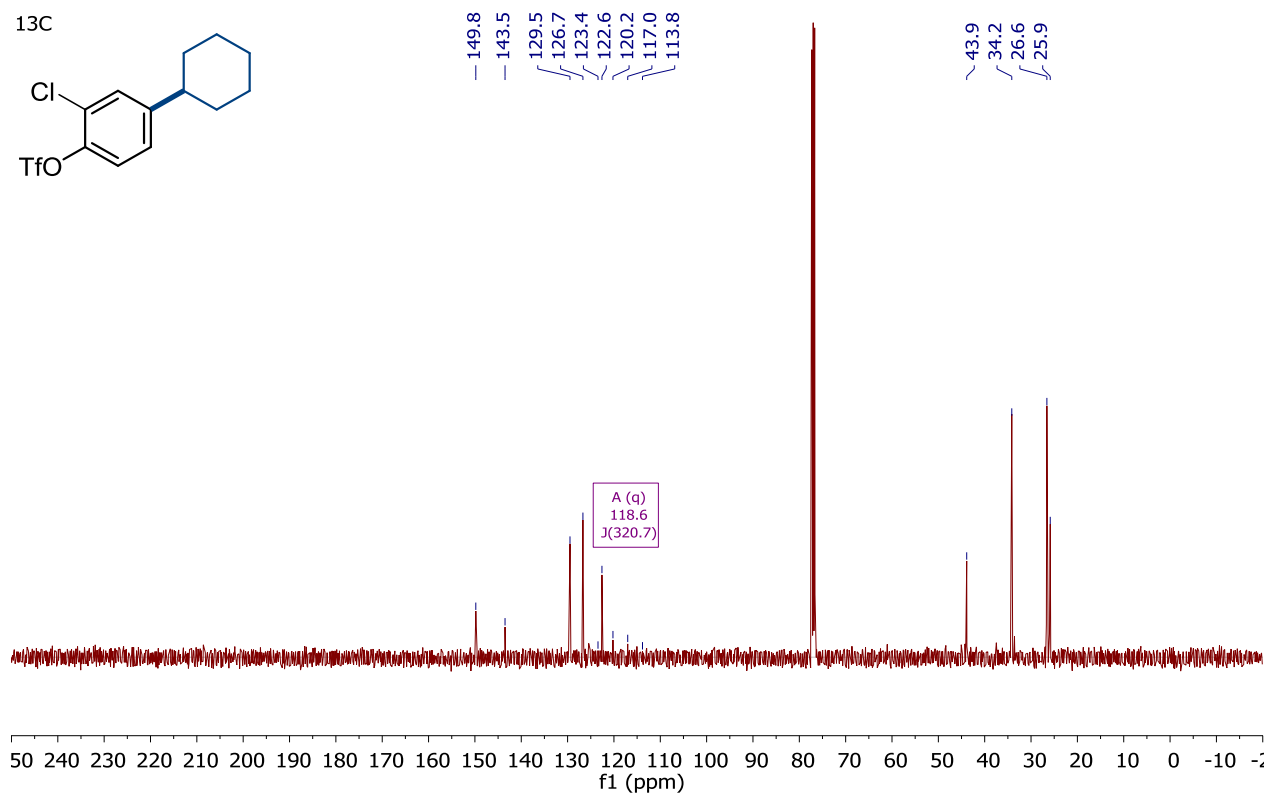

19F

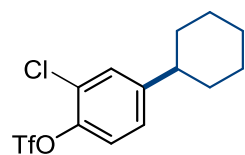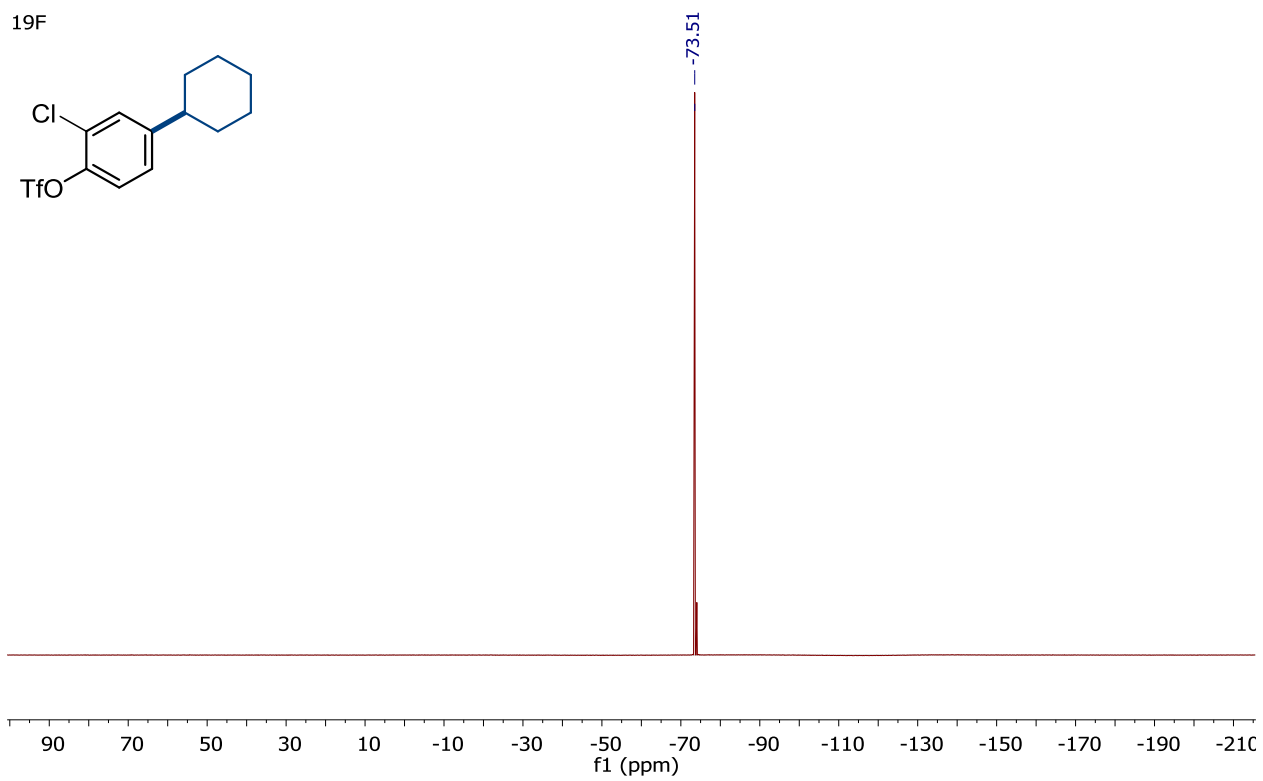

<sup>1</sup>H

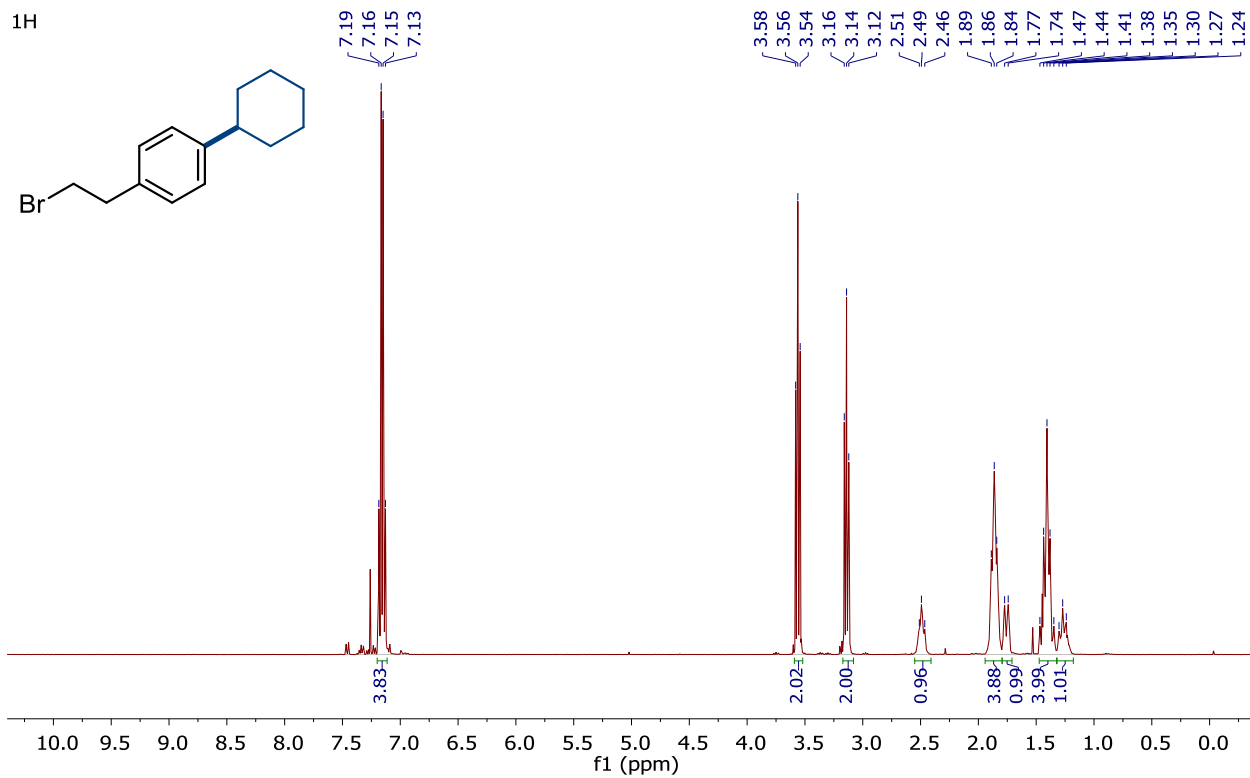

<sup>13</sup>C

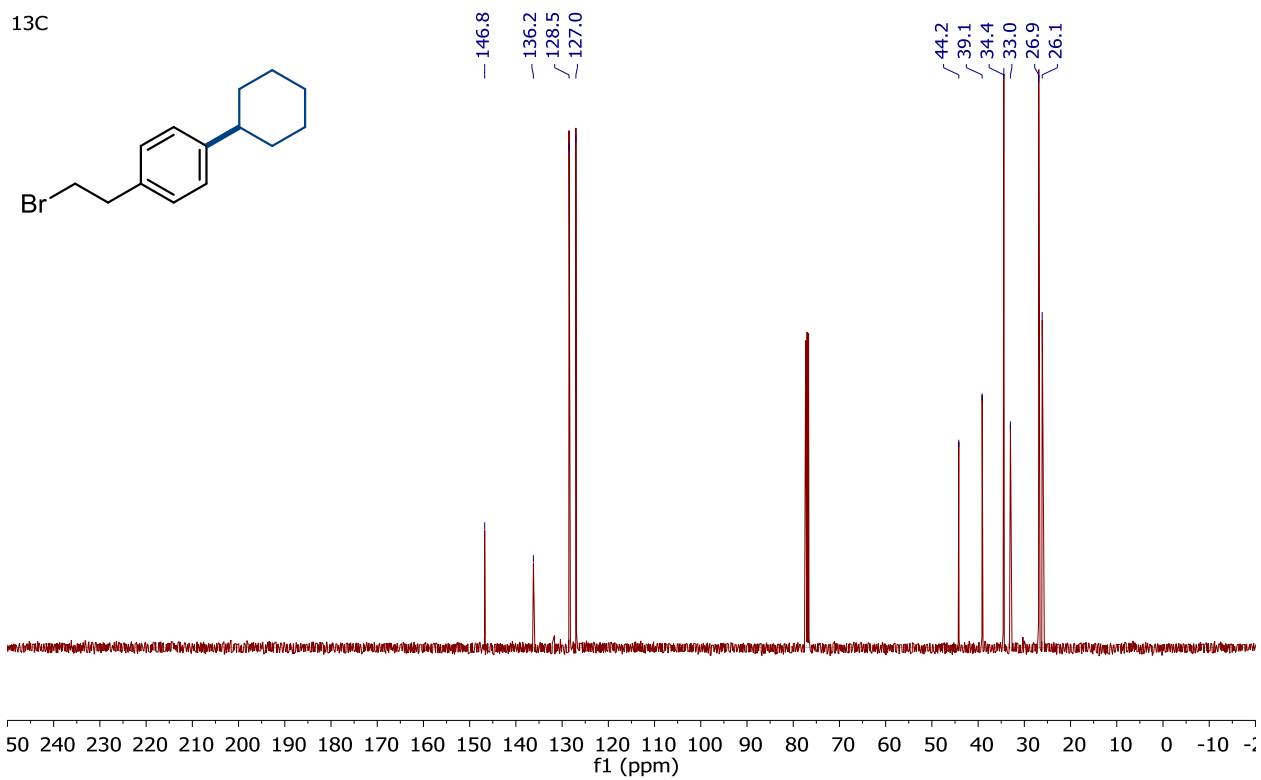

<sup>1</sup>H

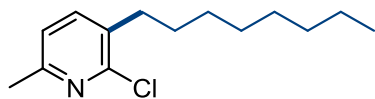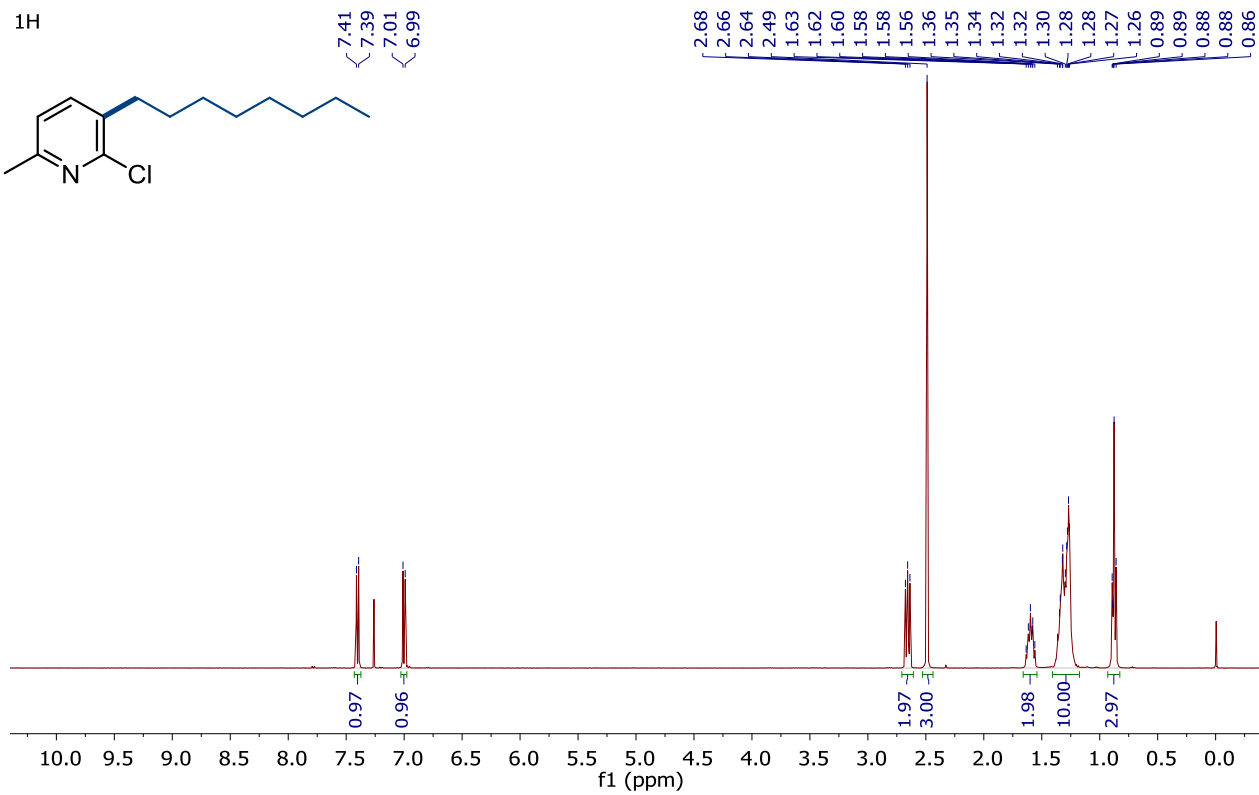

<sup>13</sup>C

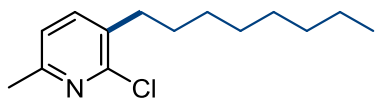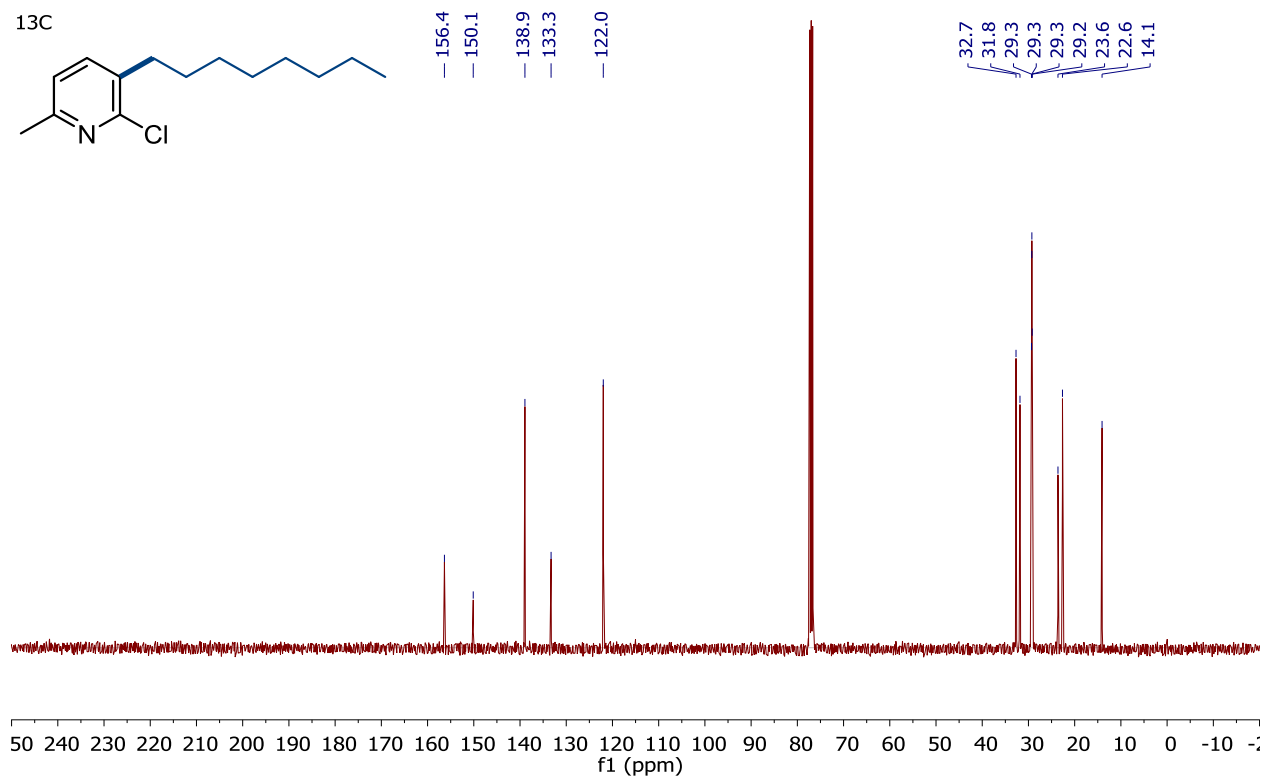

<sup>1</sup>H

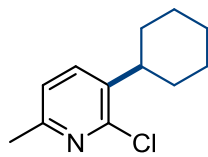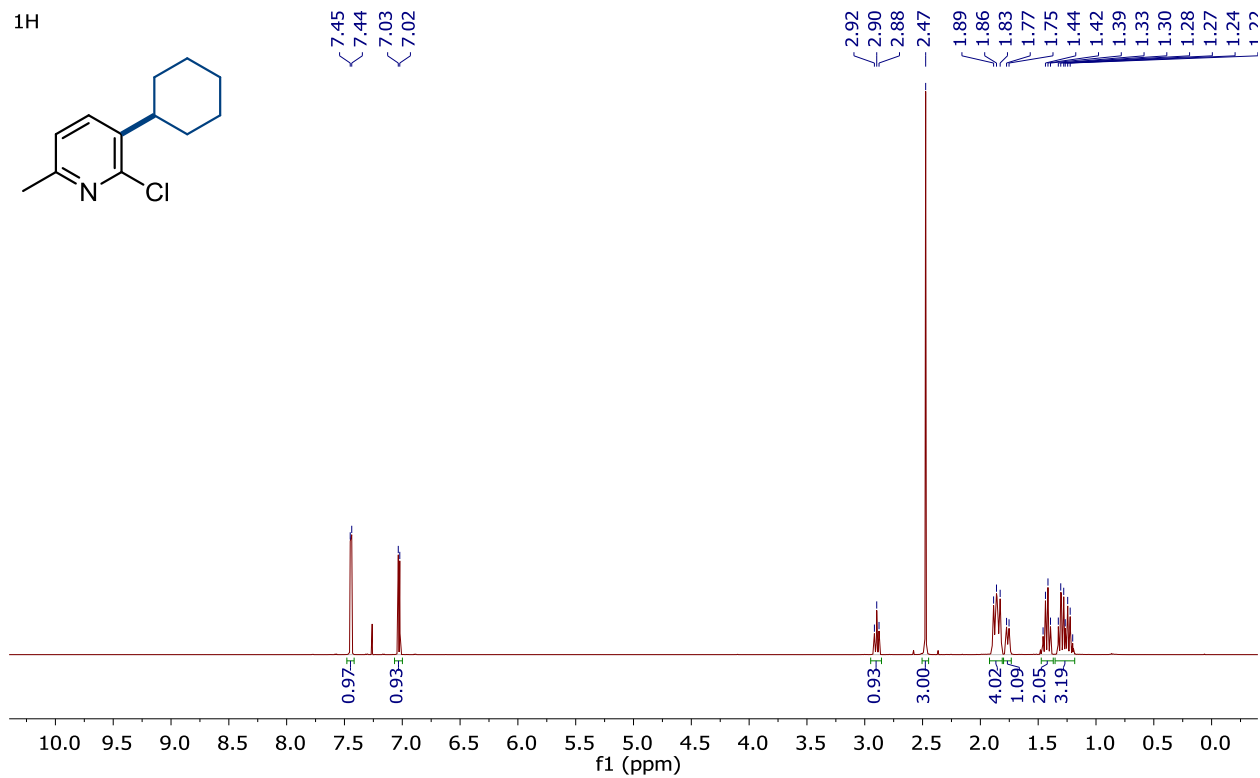

<sup>13</sup>C

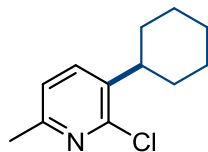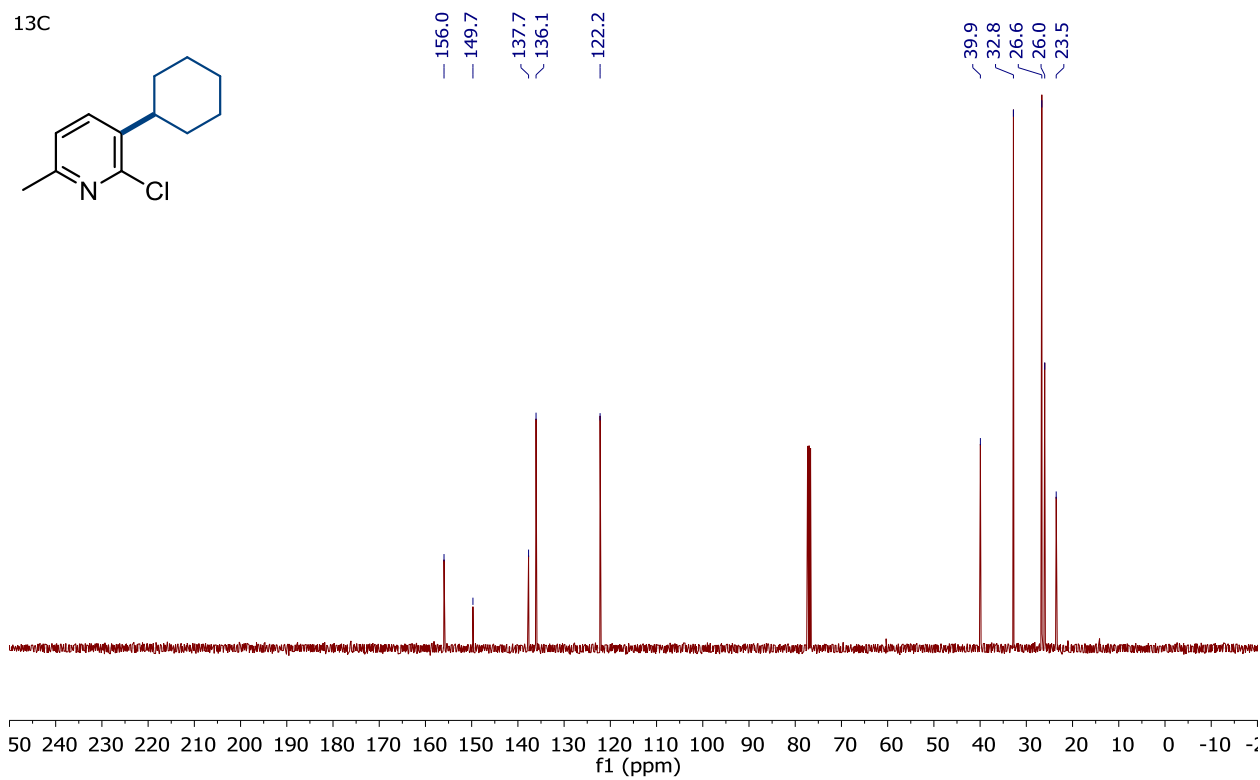

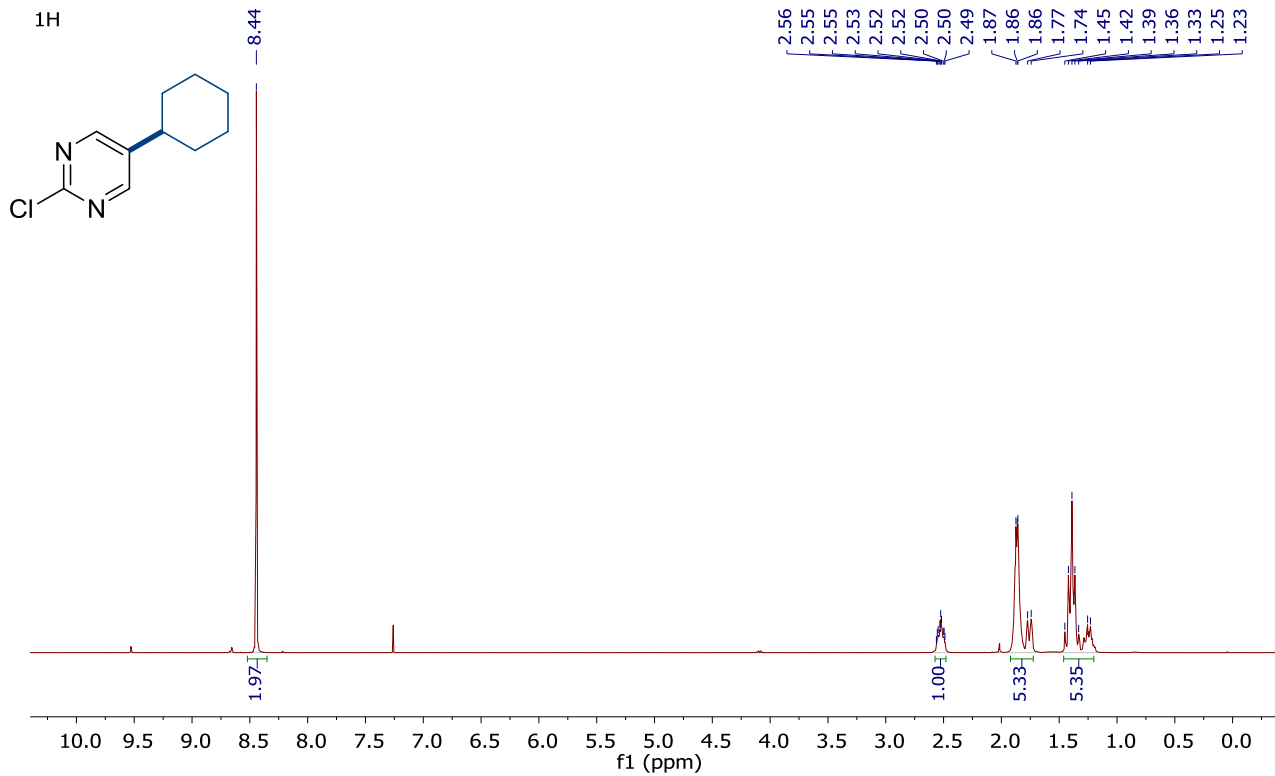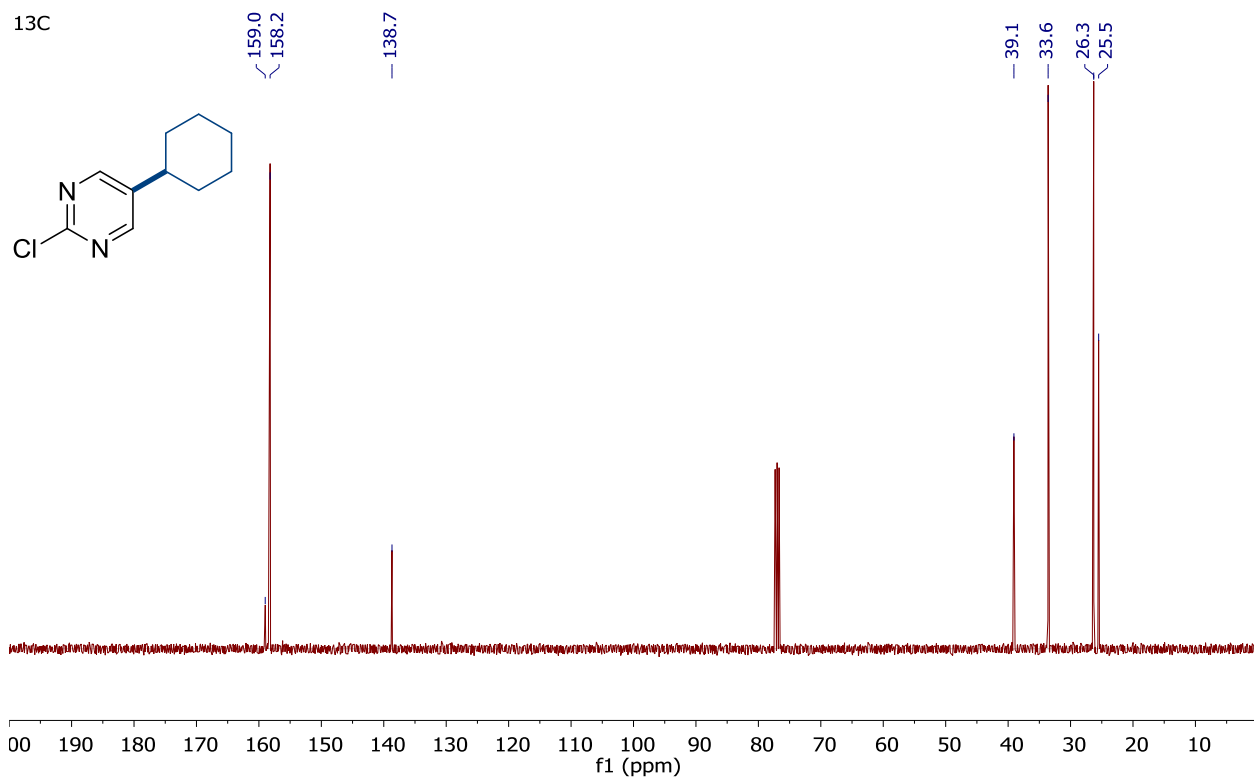

<sup>1</sup>H

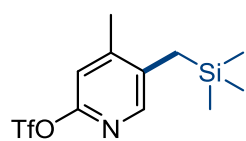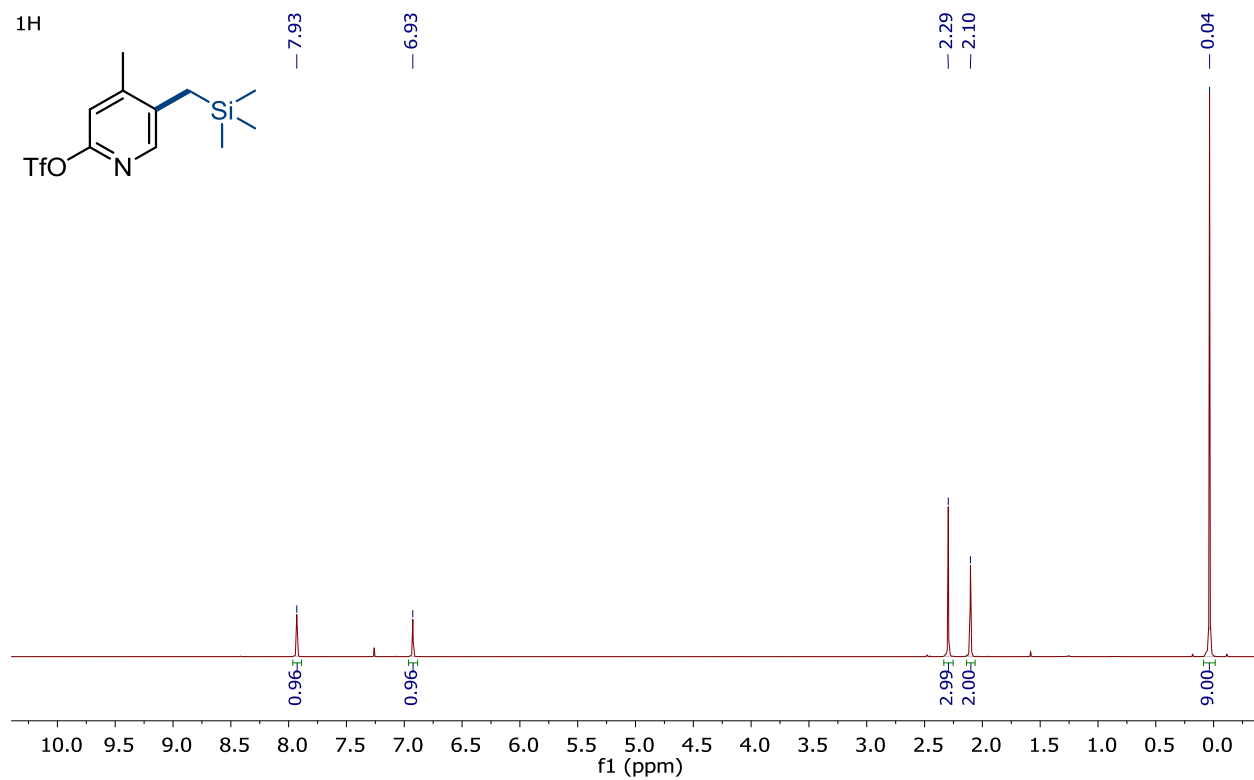

<sup>13</sup>C

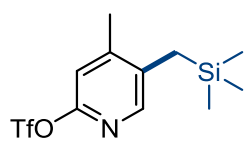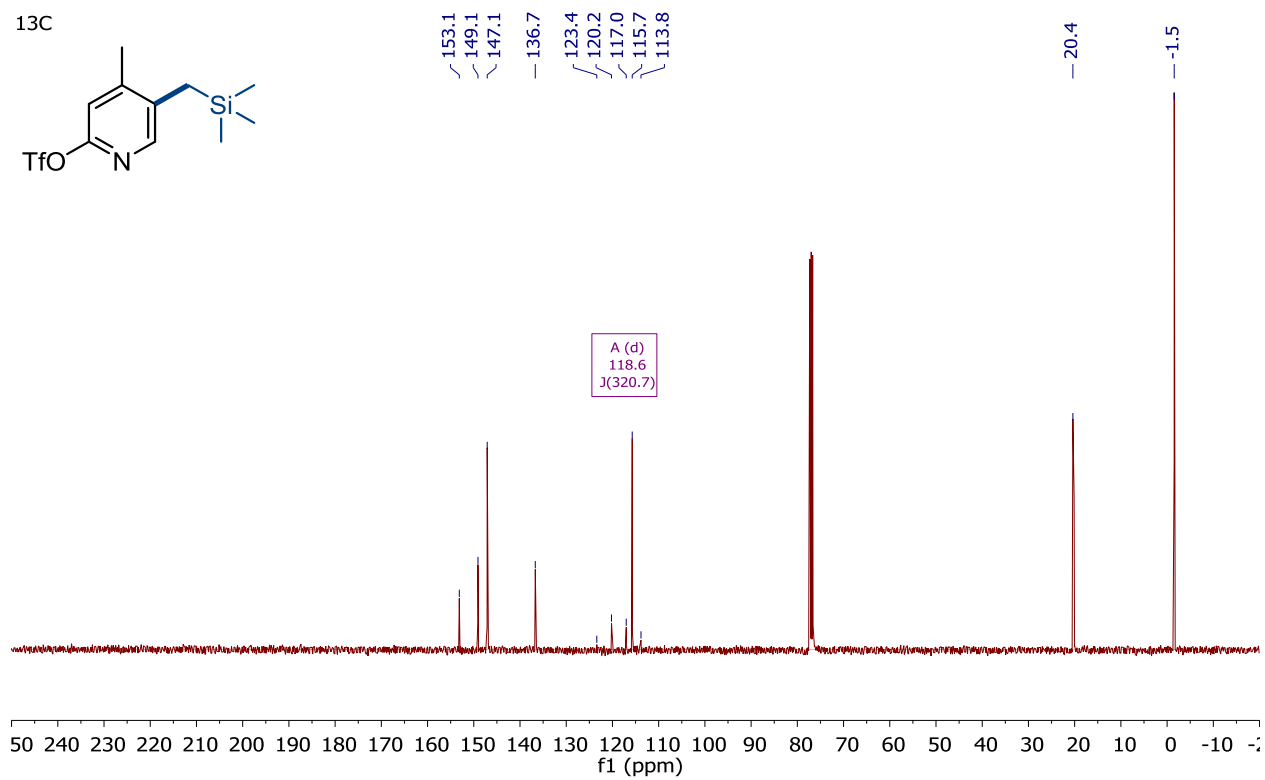

19F

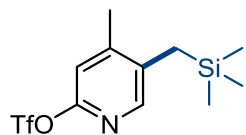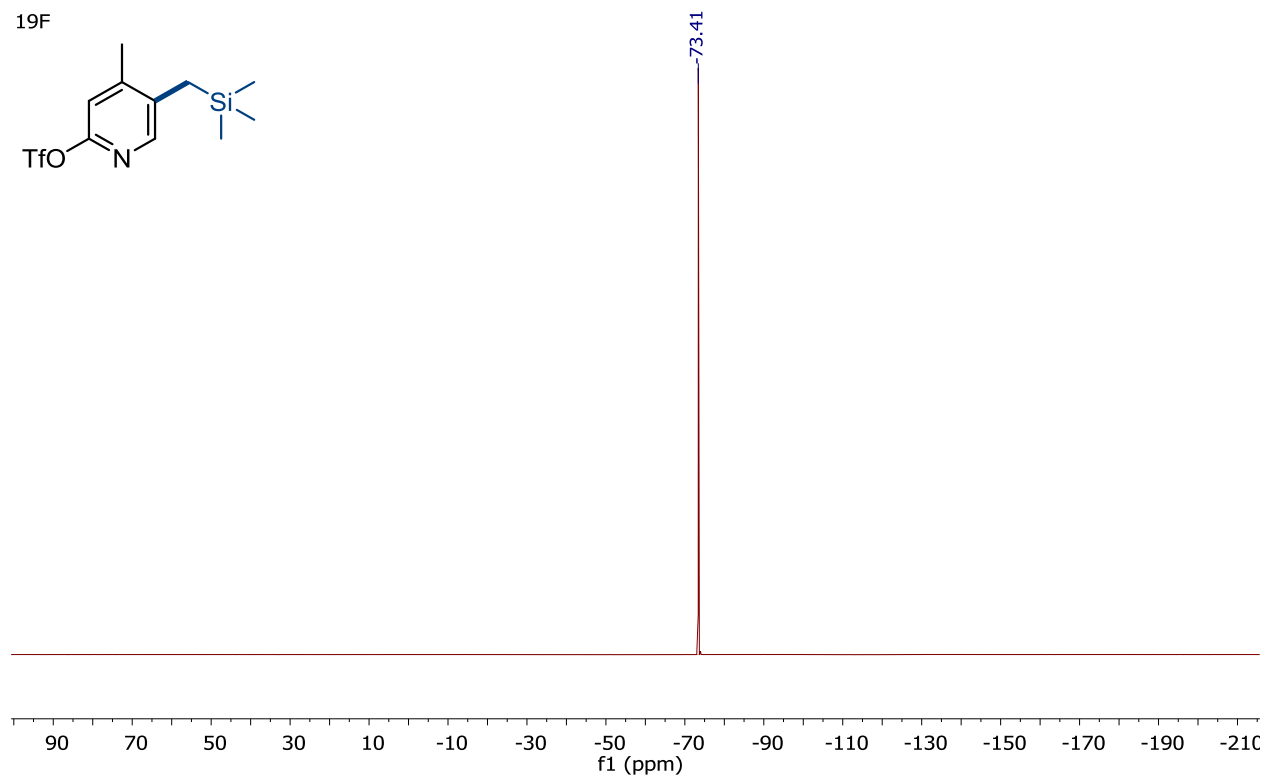

1H

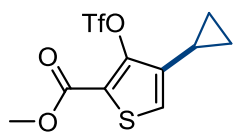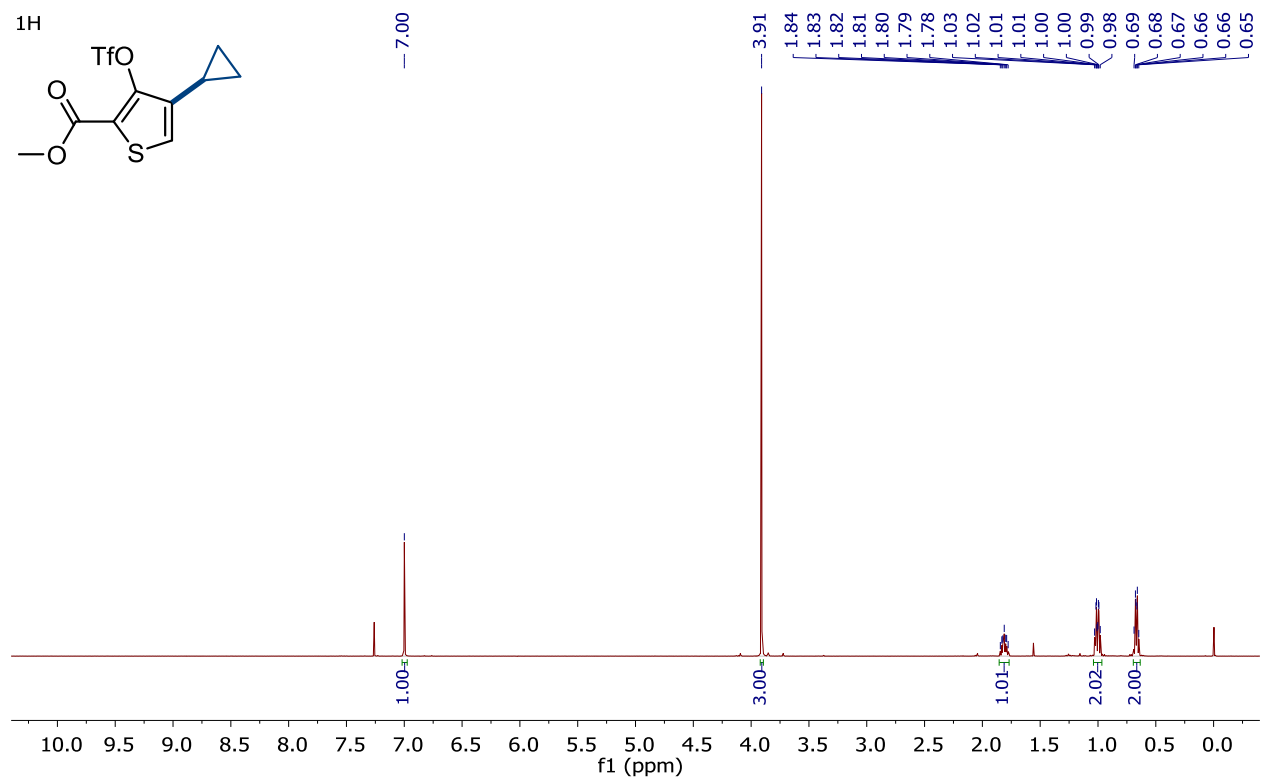



13C

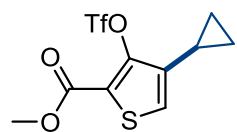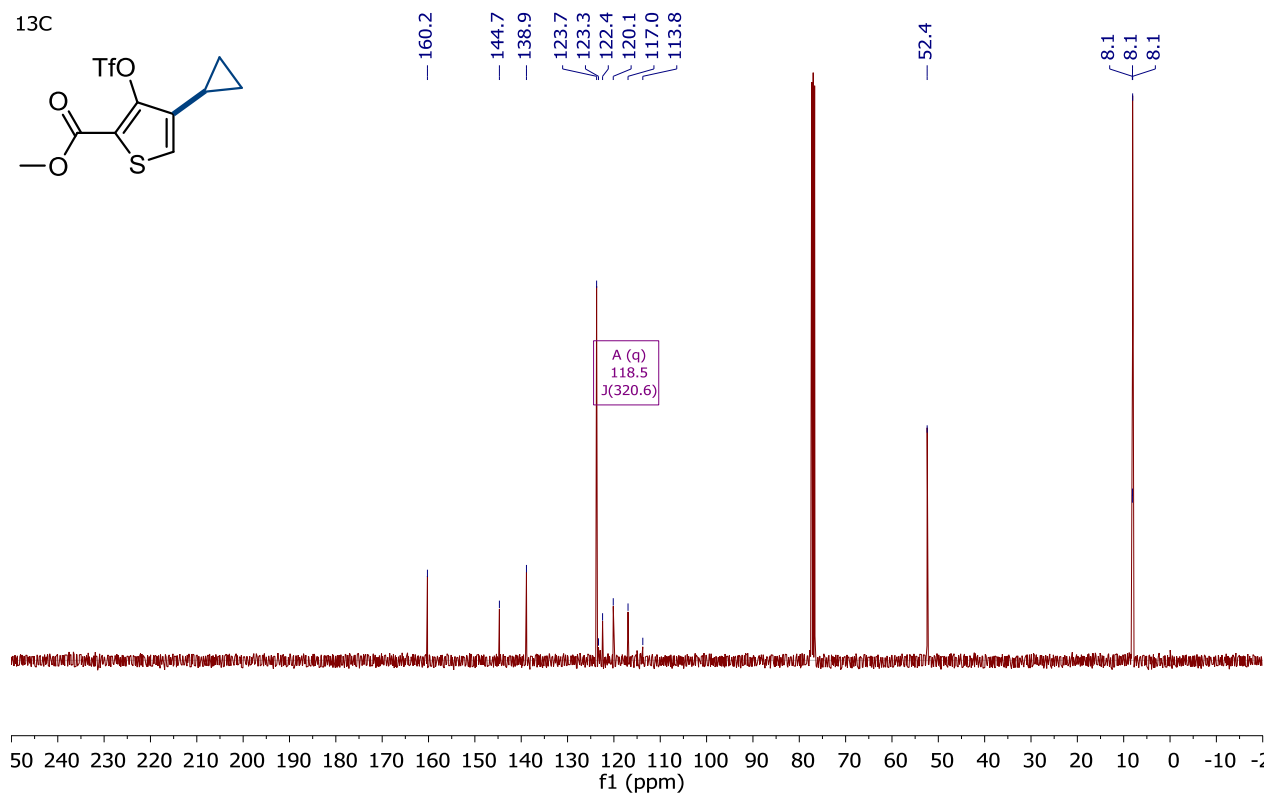

19F

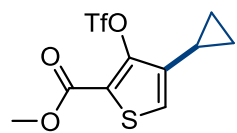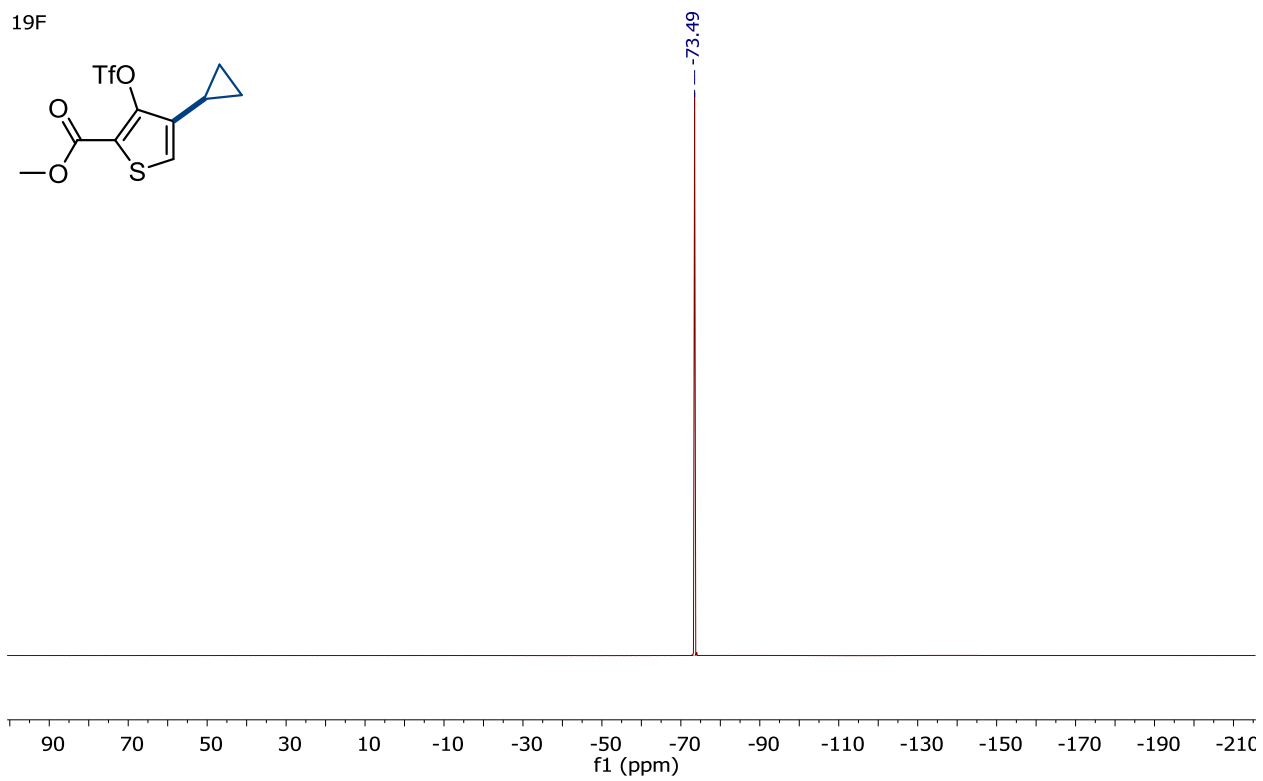

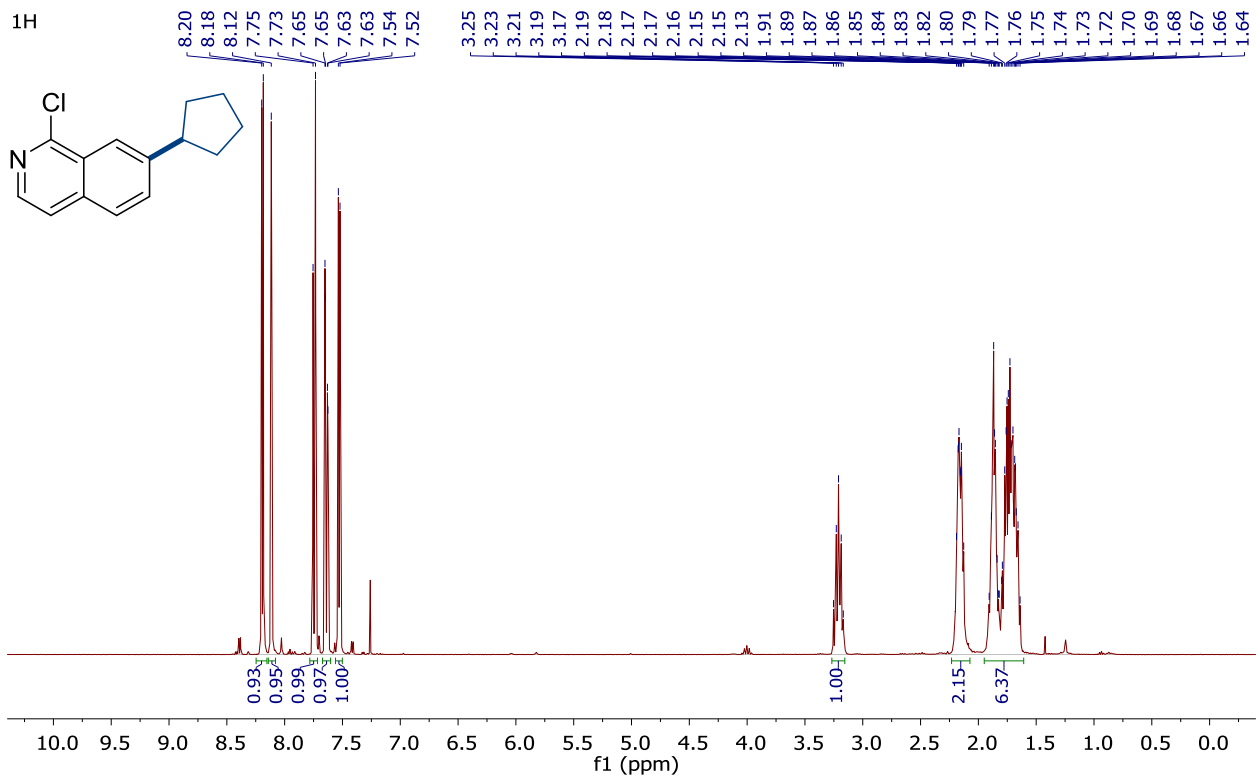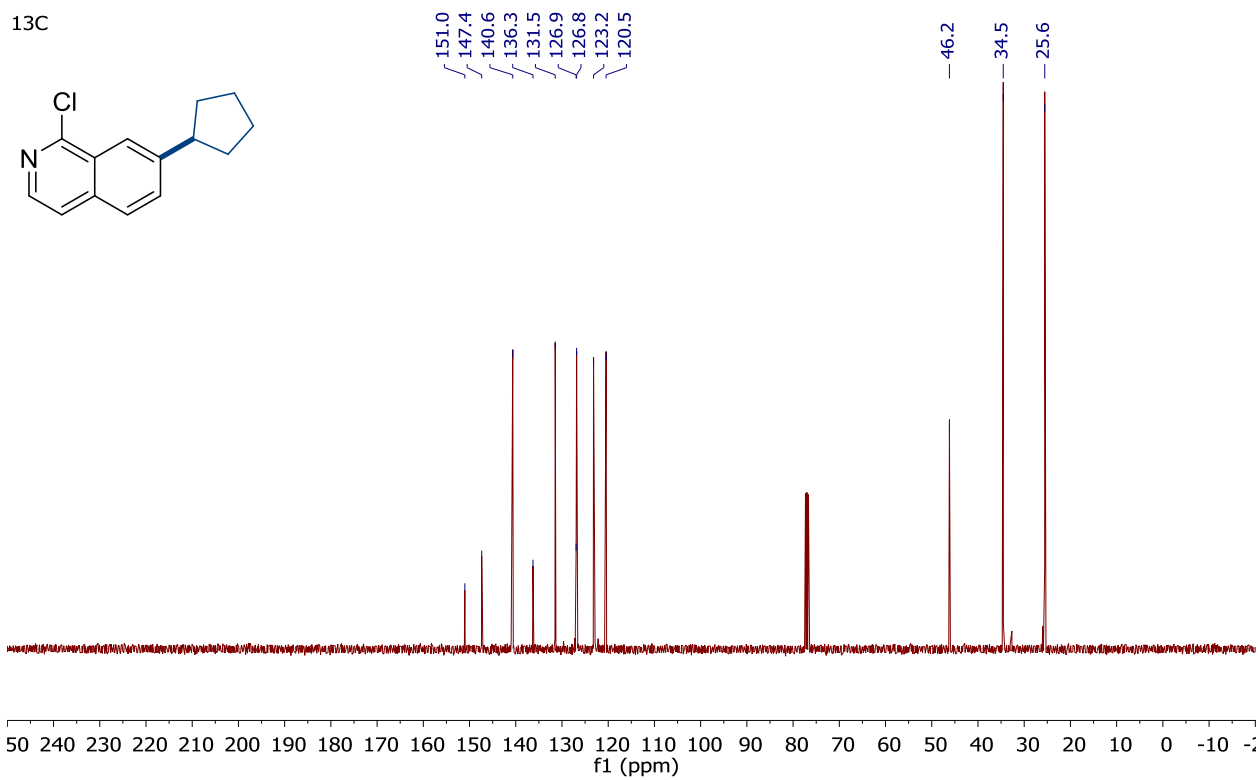

<sup>1</sup>H

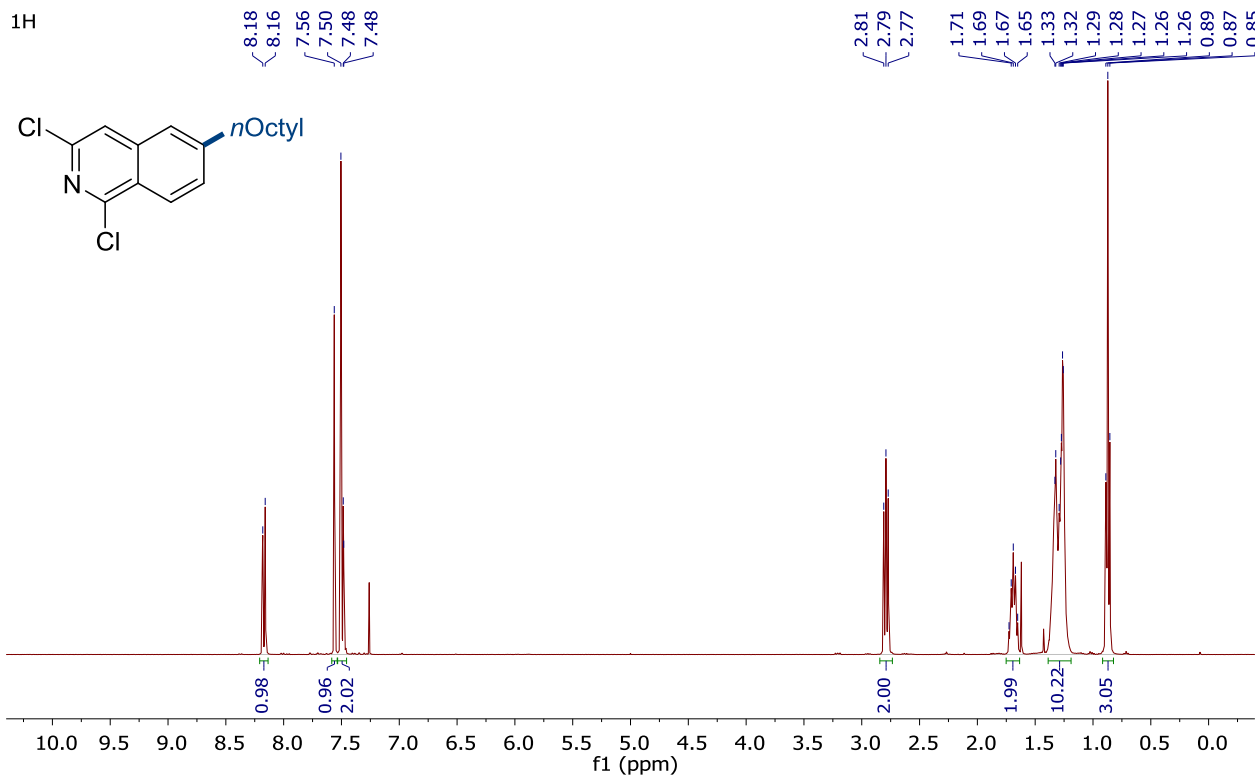

<sup>13</sup>C

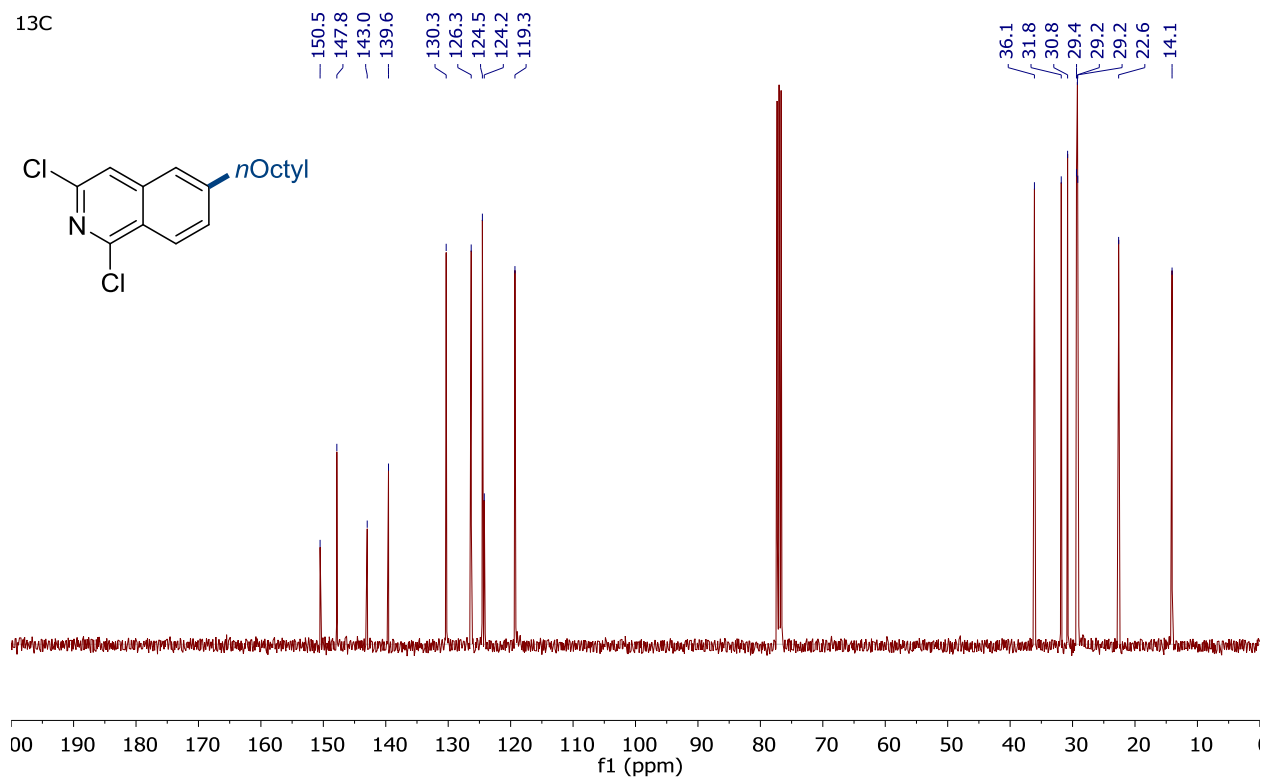

<sup>1</sup>H

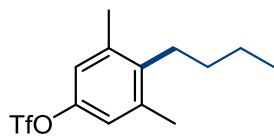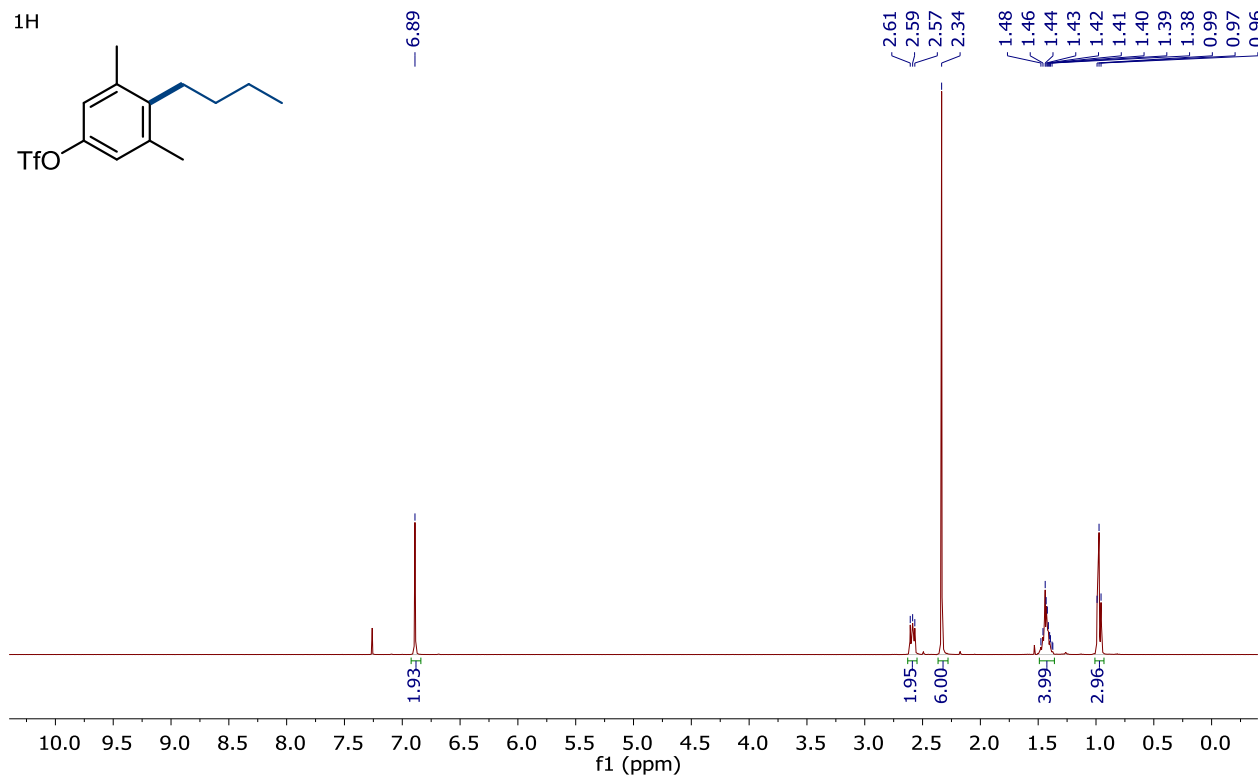

<sup>13</sup>C

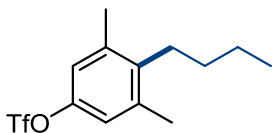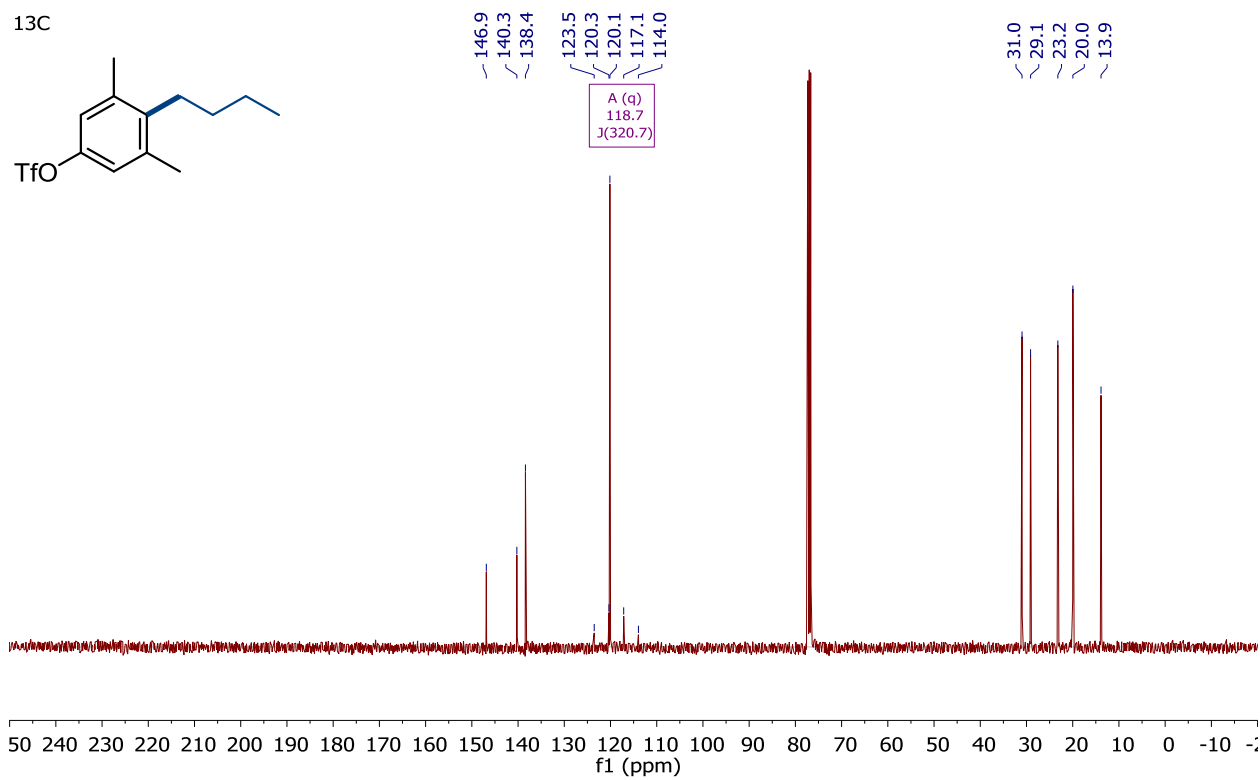

19F

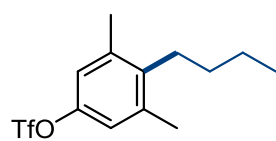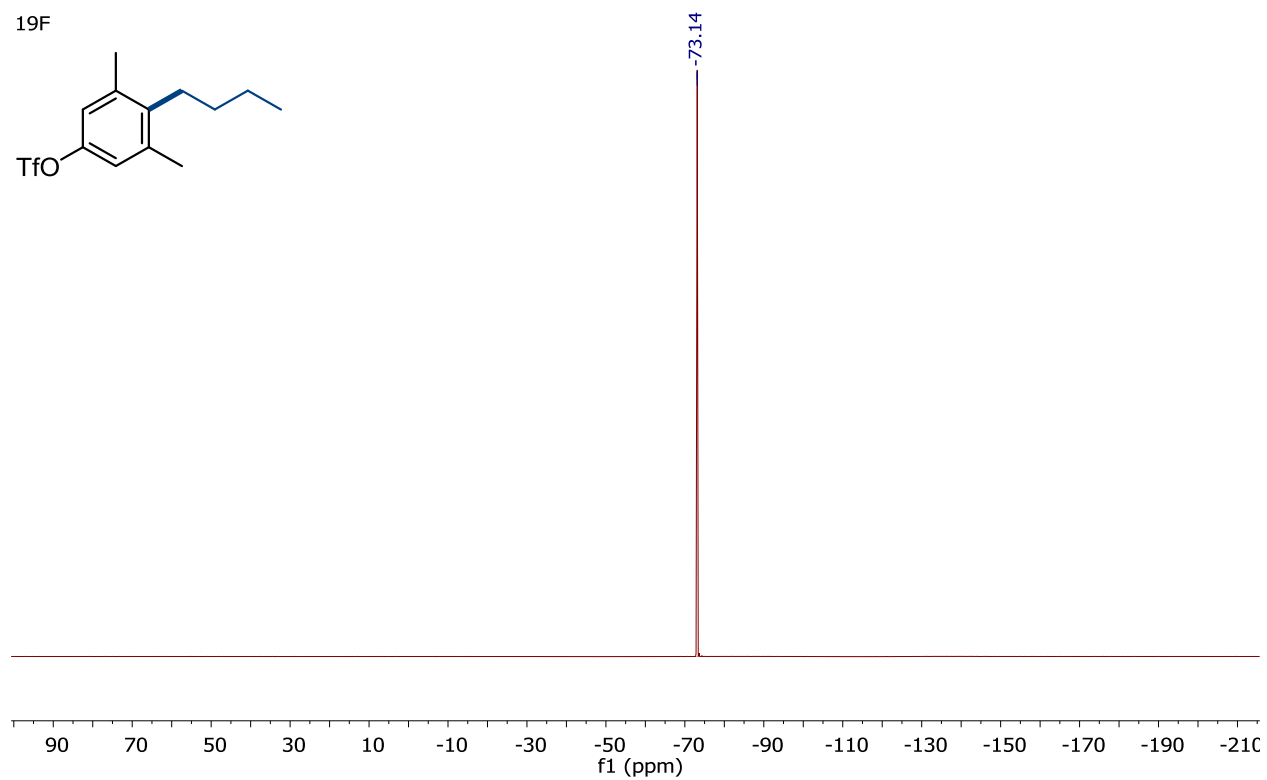

1H

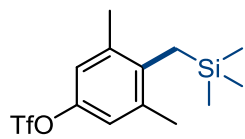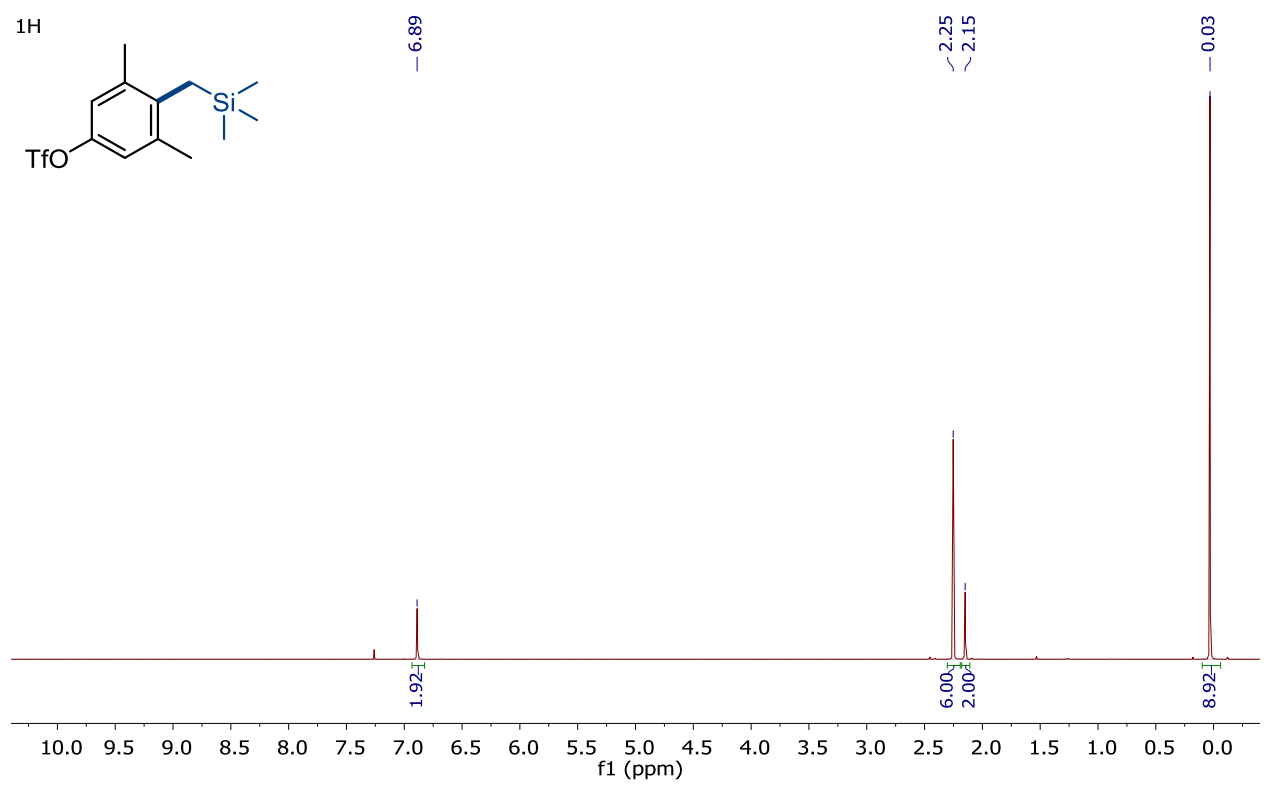

13C

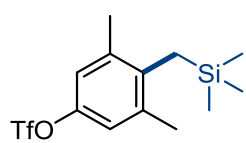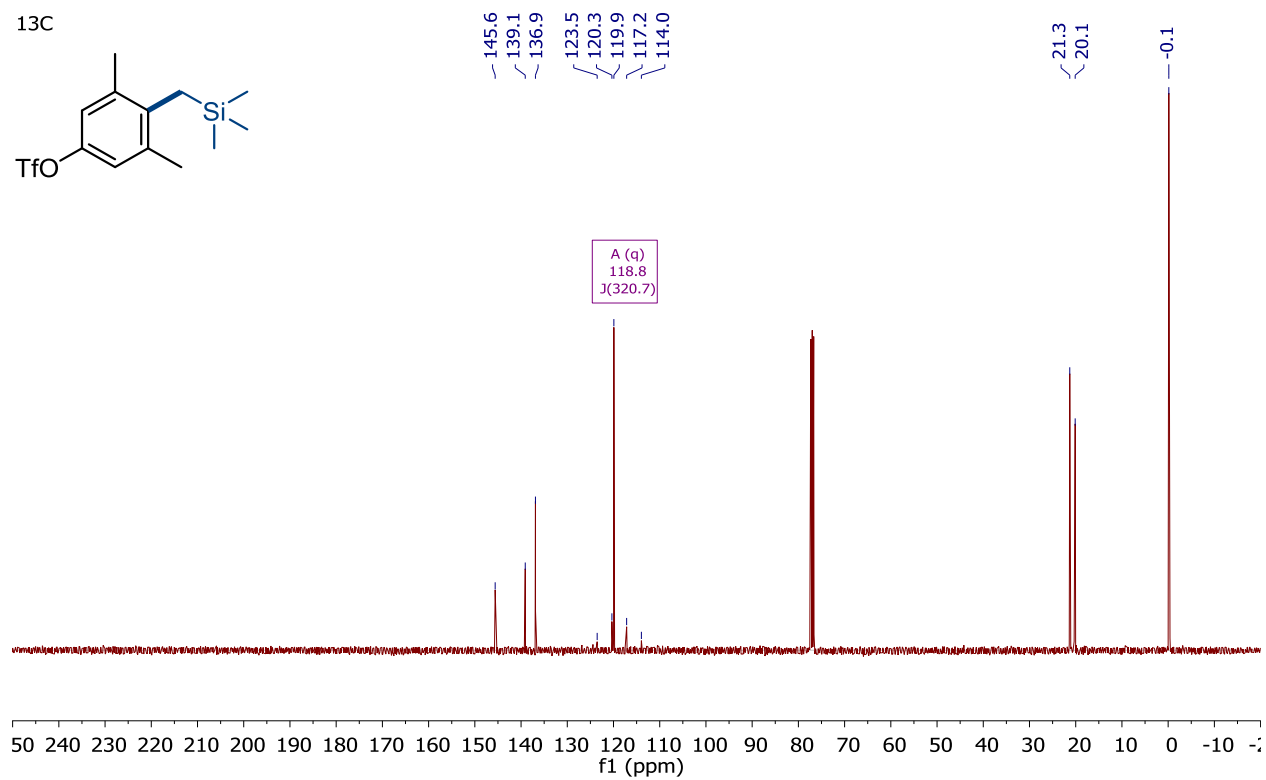

19F

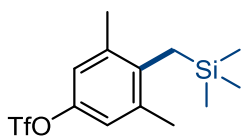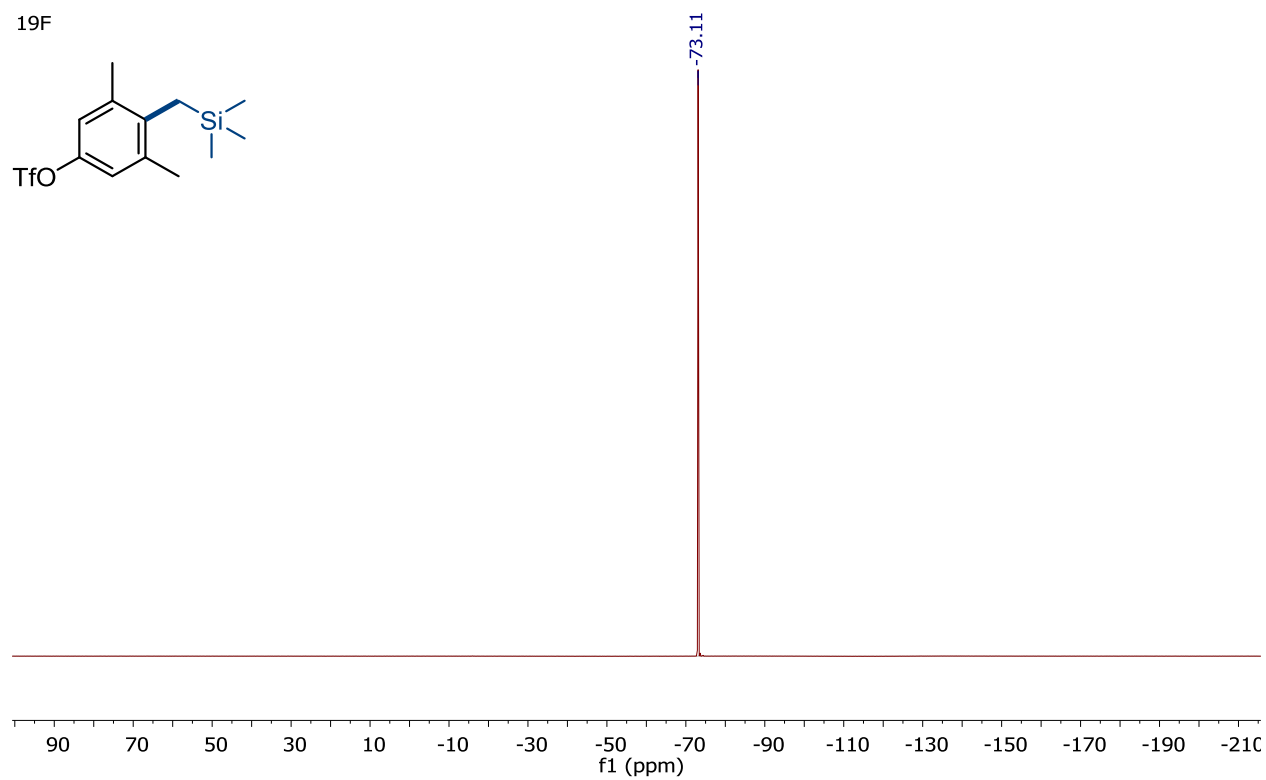

<sup>1</sup>H

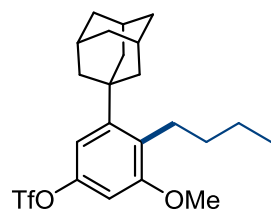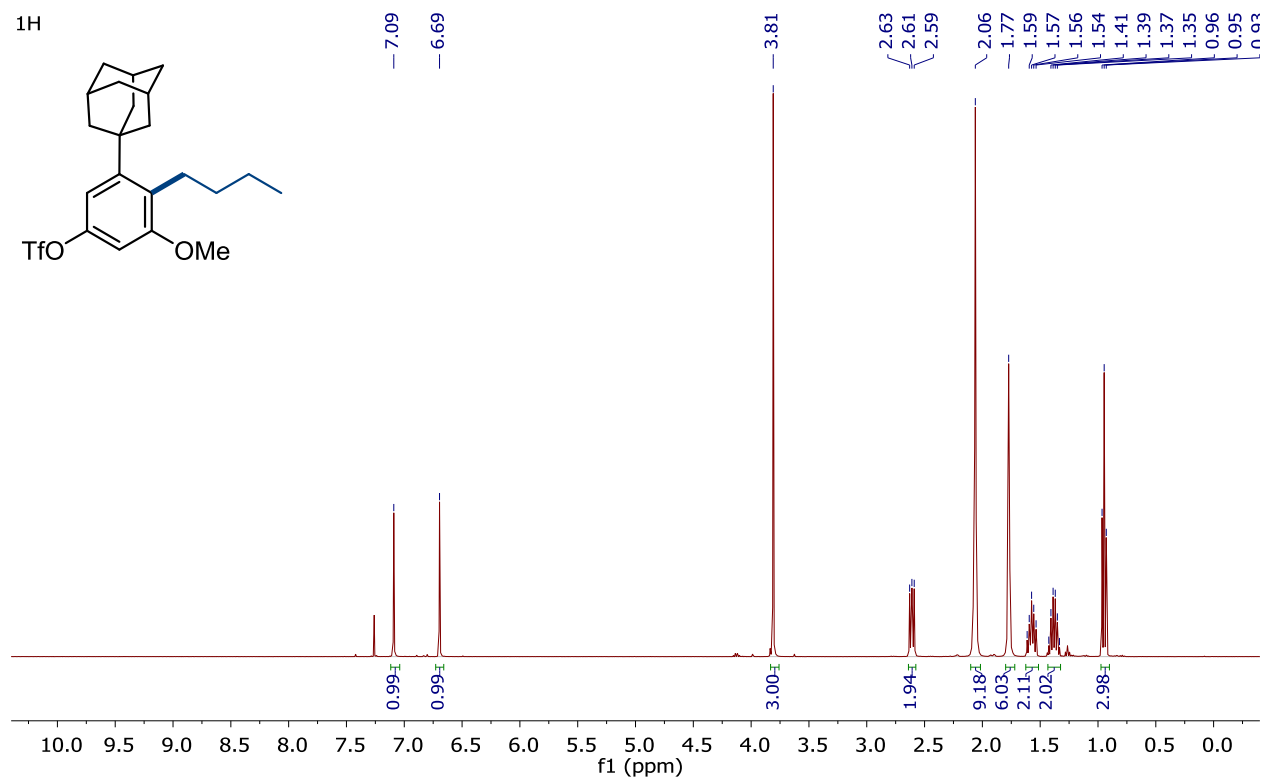

<sup>13</sup>C

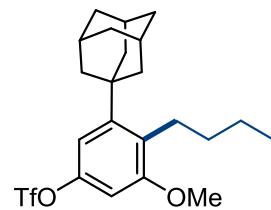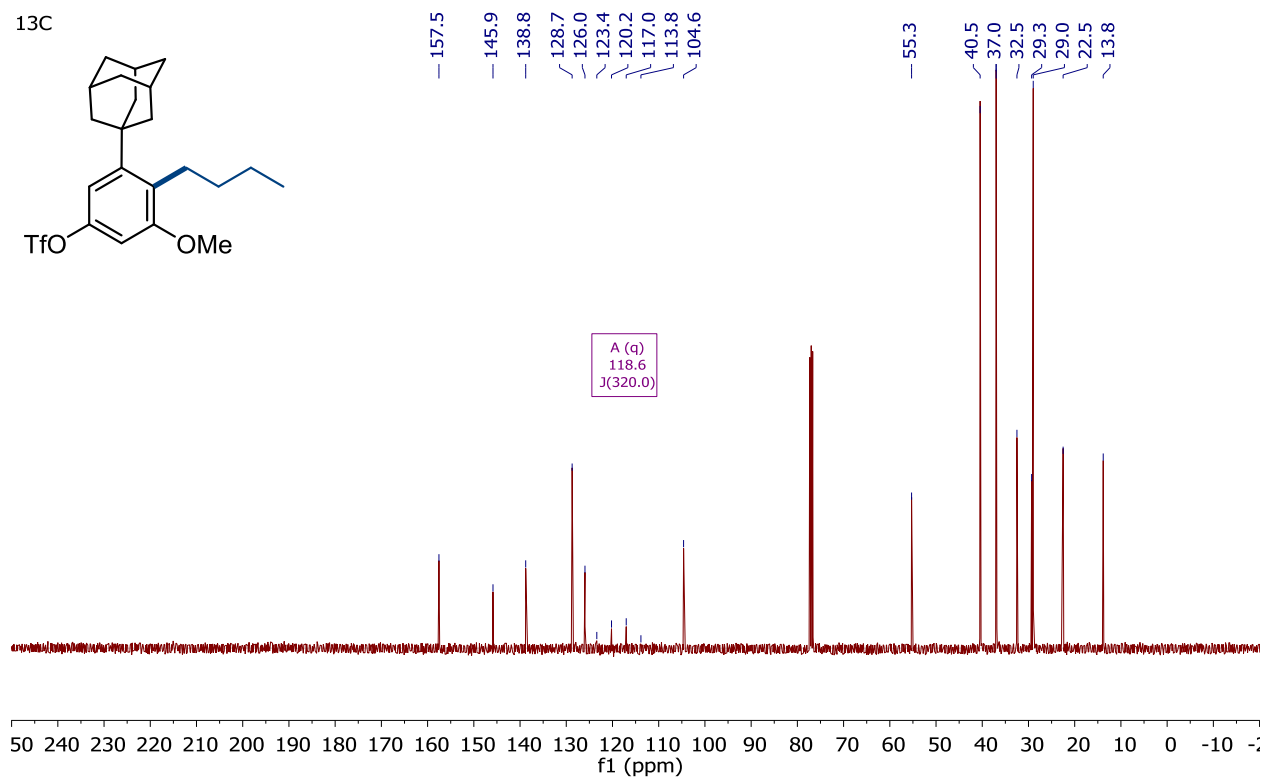

19F

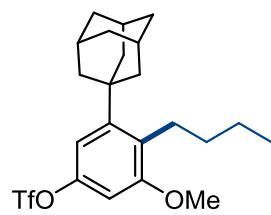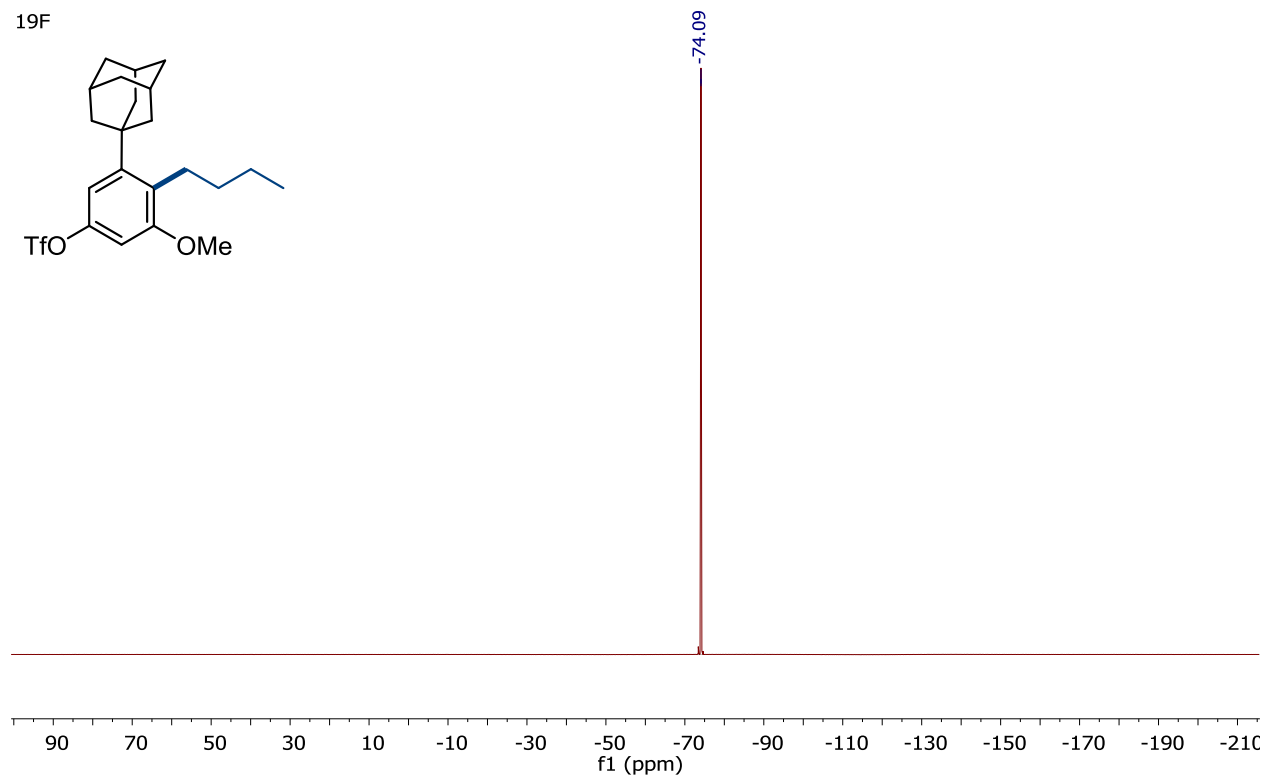

1H

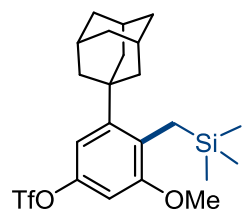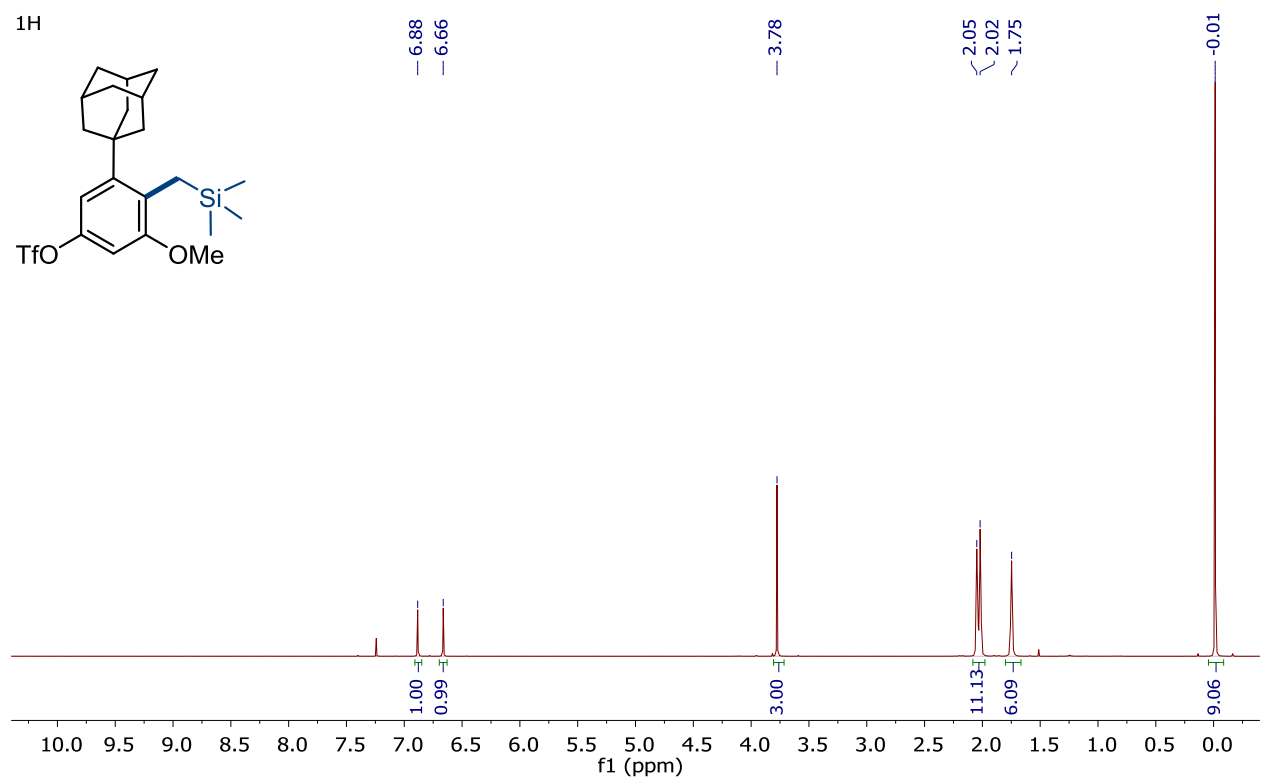





<sup>1</sup>H

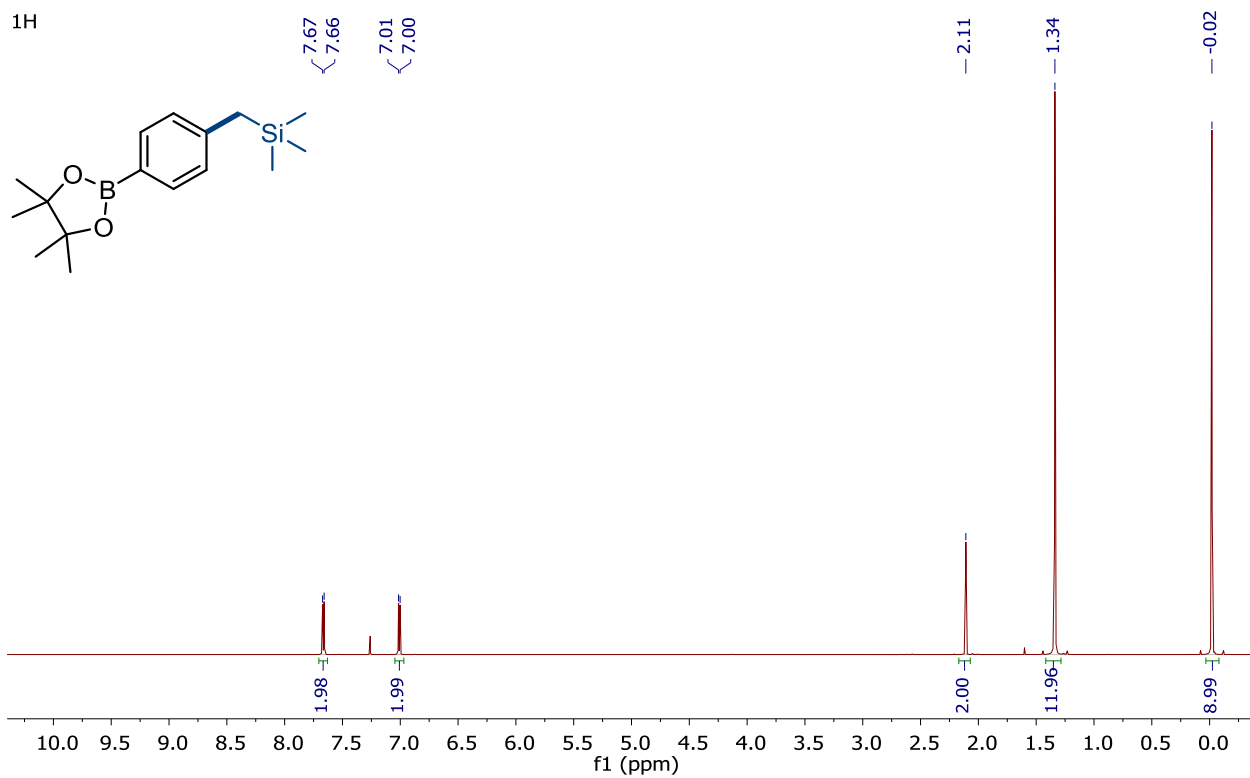

<sup>13</sup>C

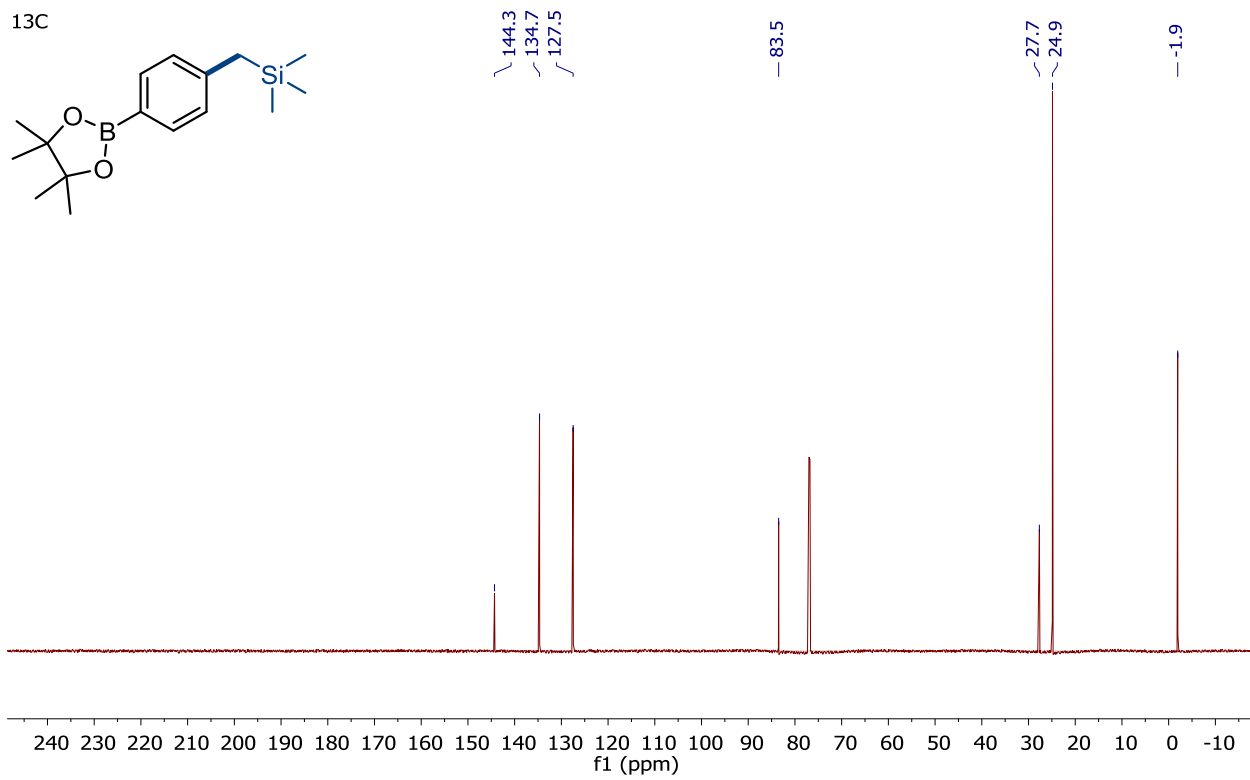

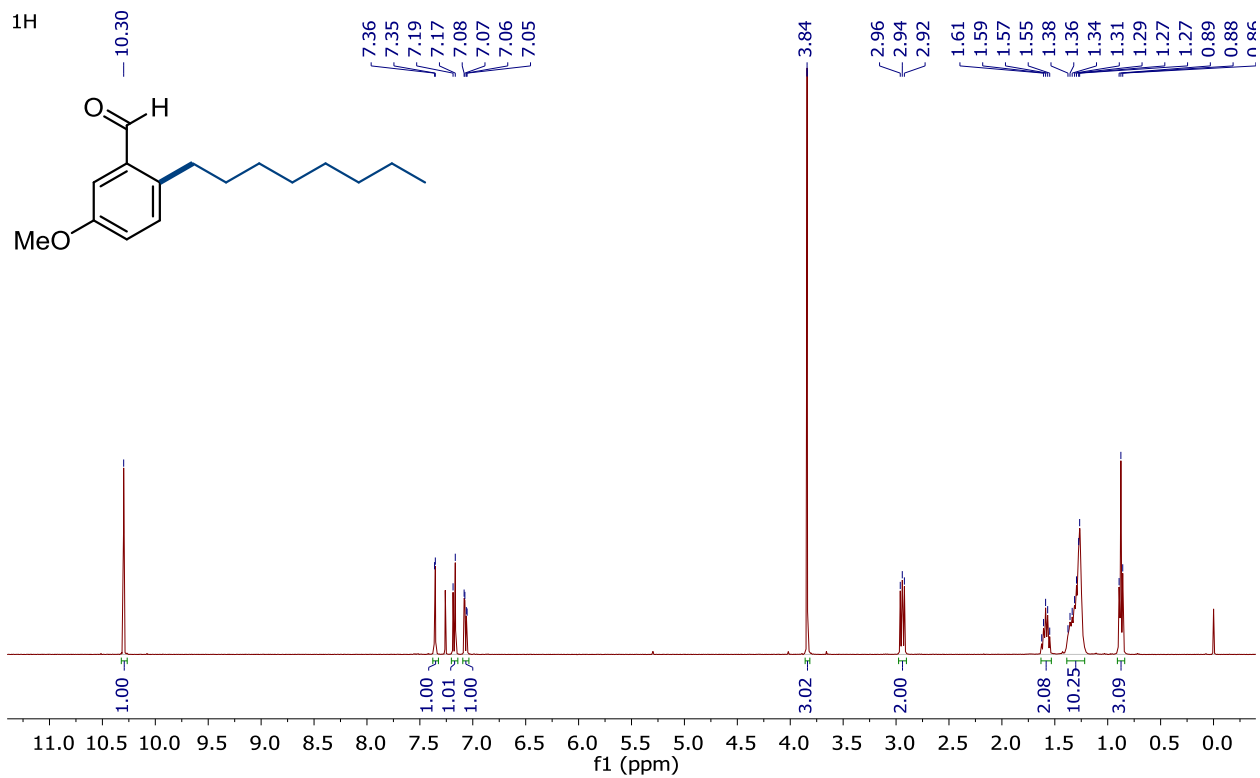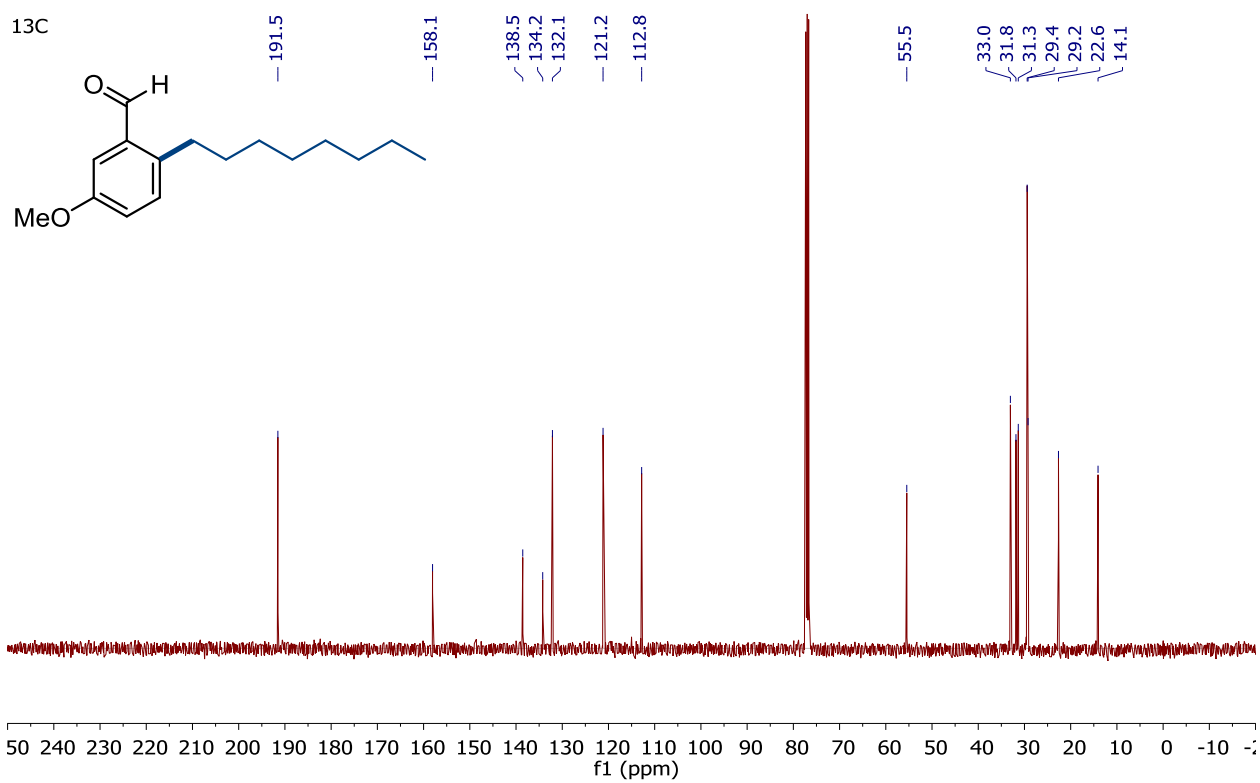

<sup>1</sup>H

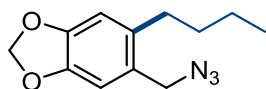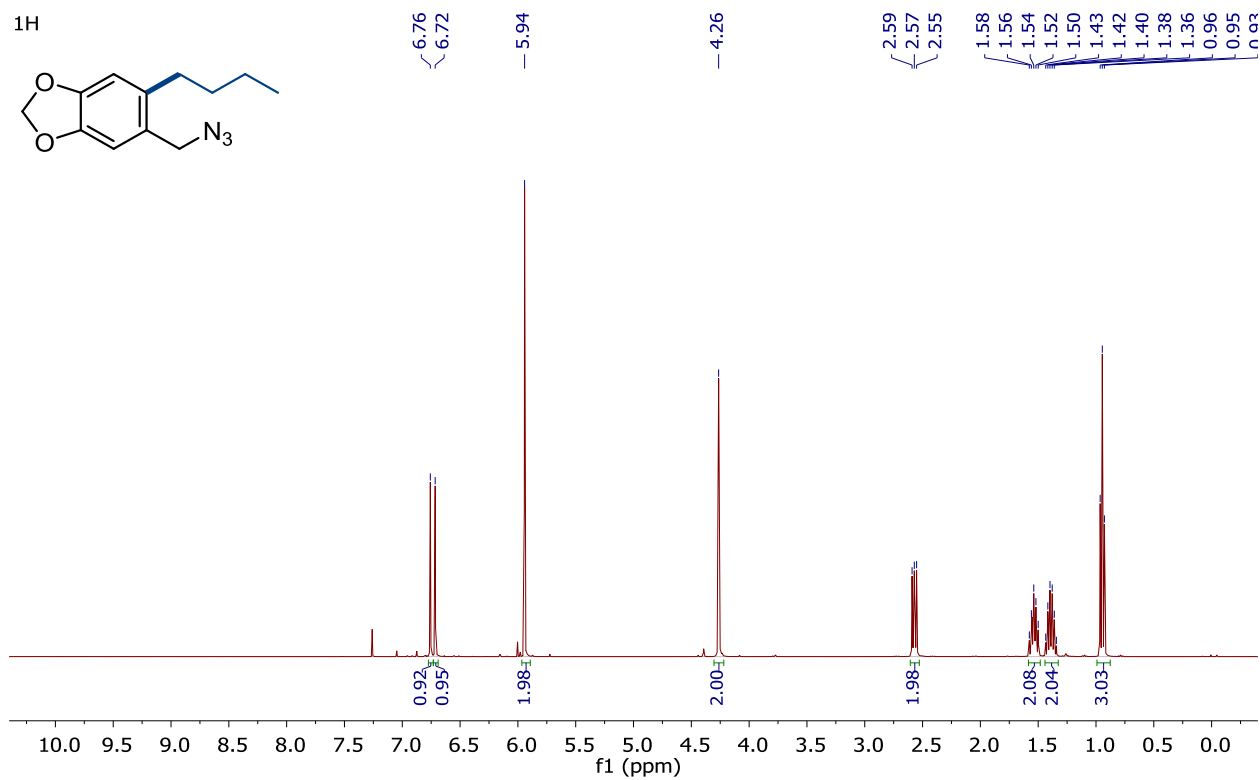

<sup>13</sup>C

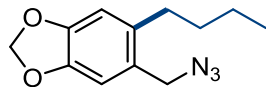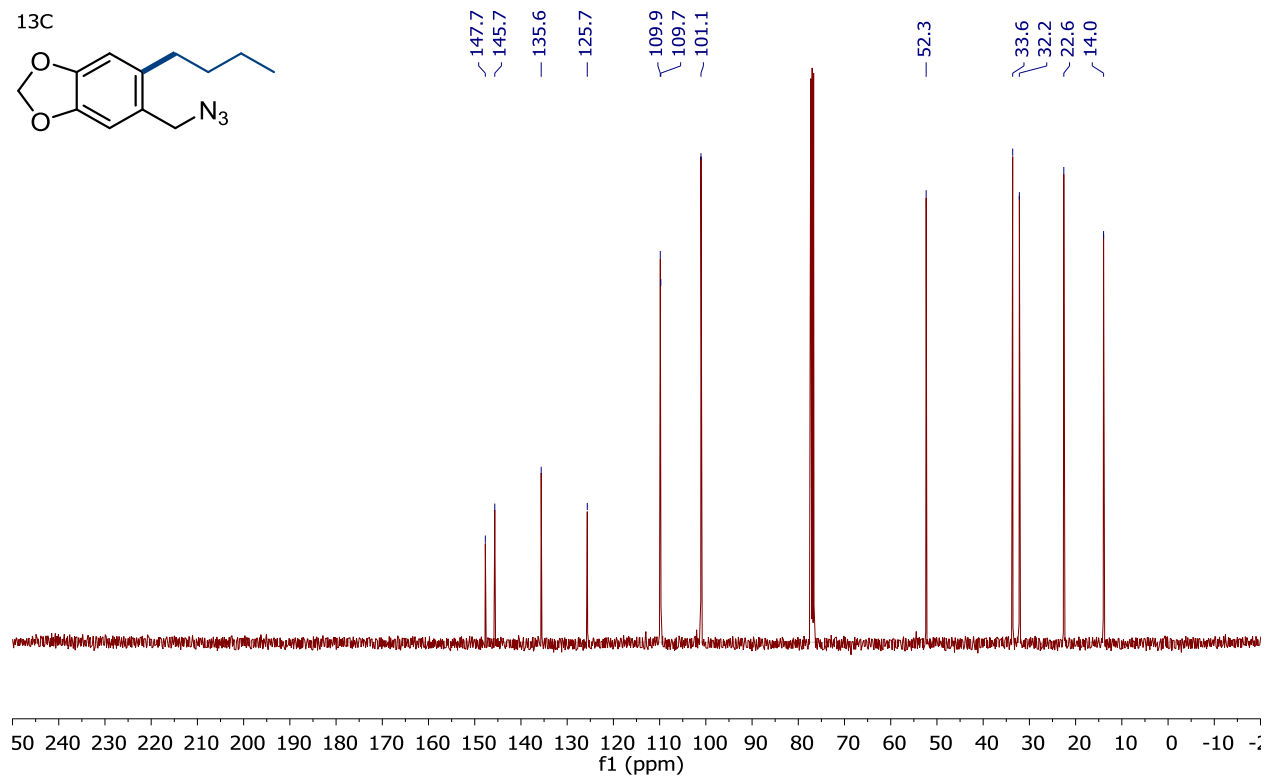

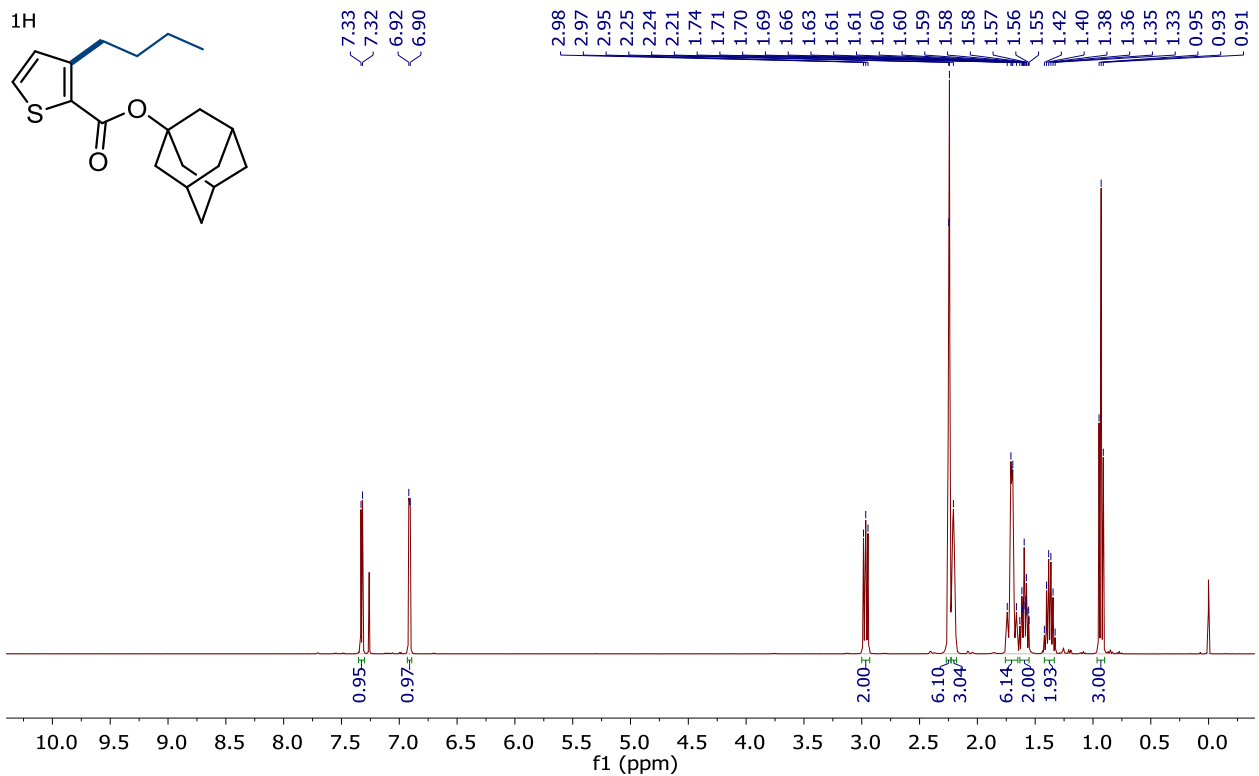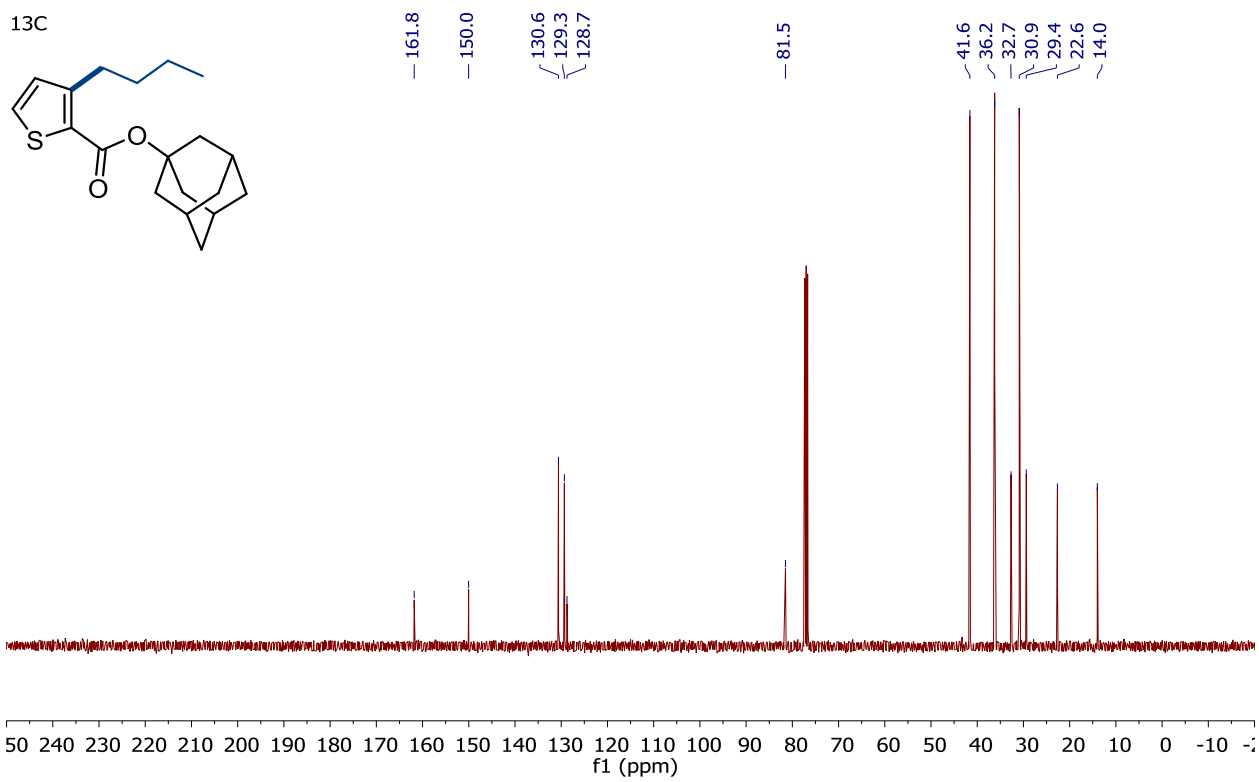

<sup>1</sup>H

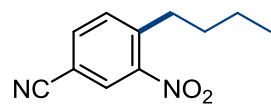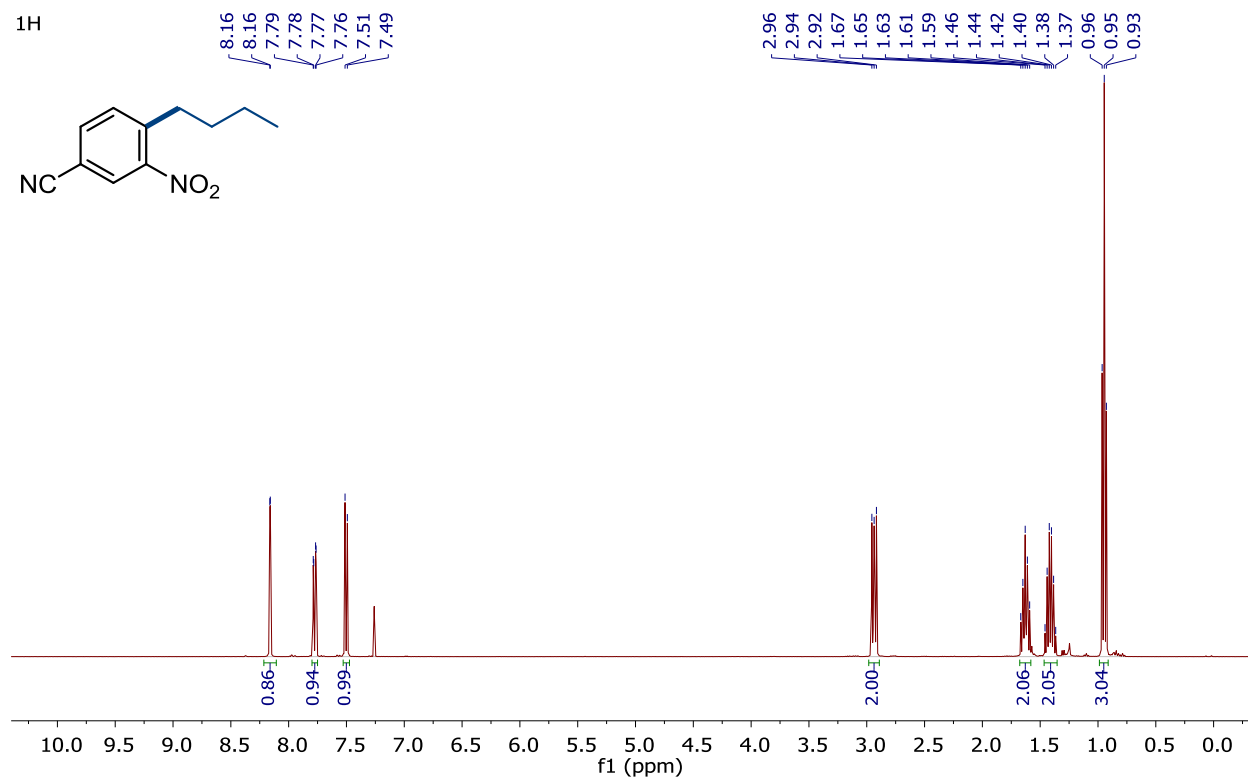

<sup>13</sup>C

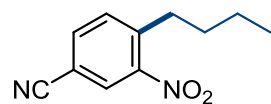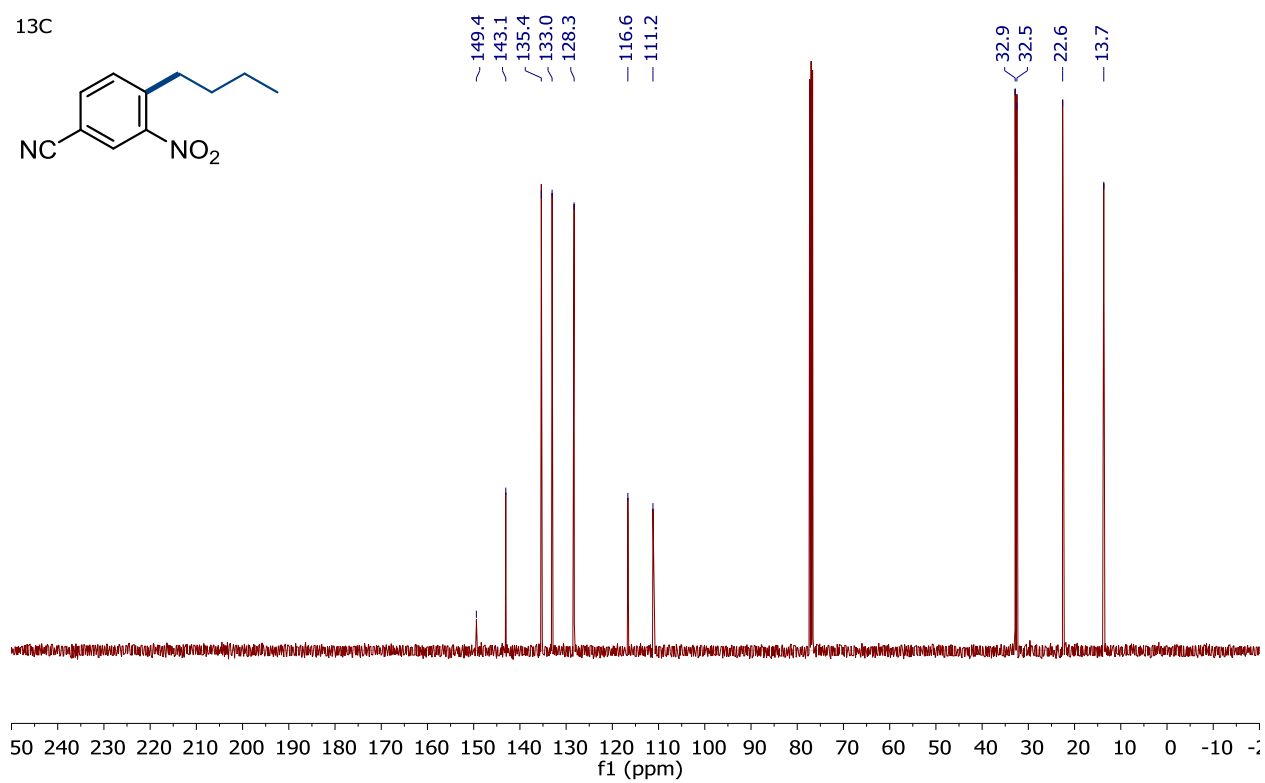

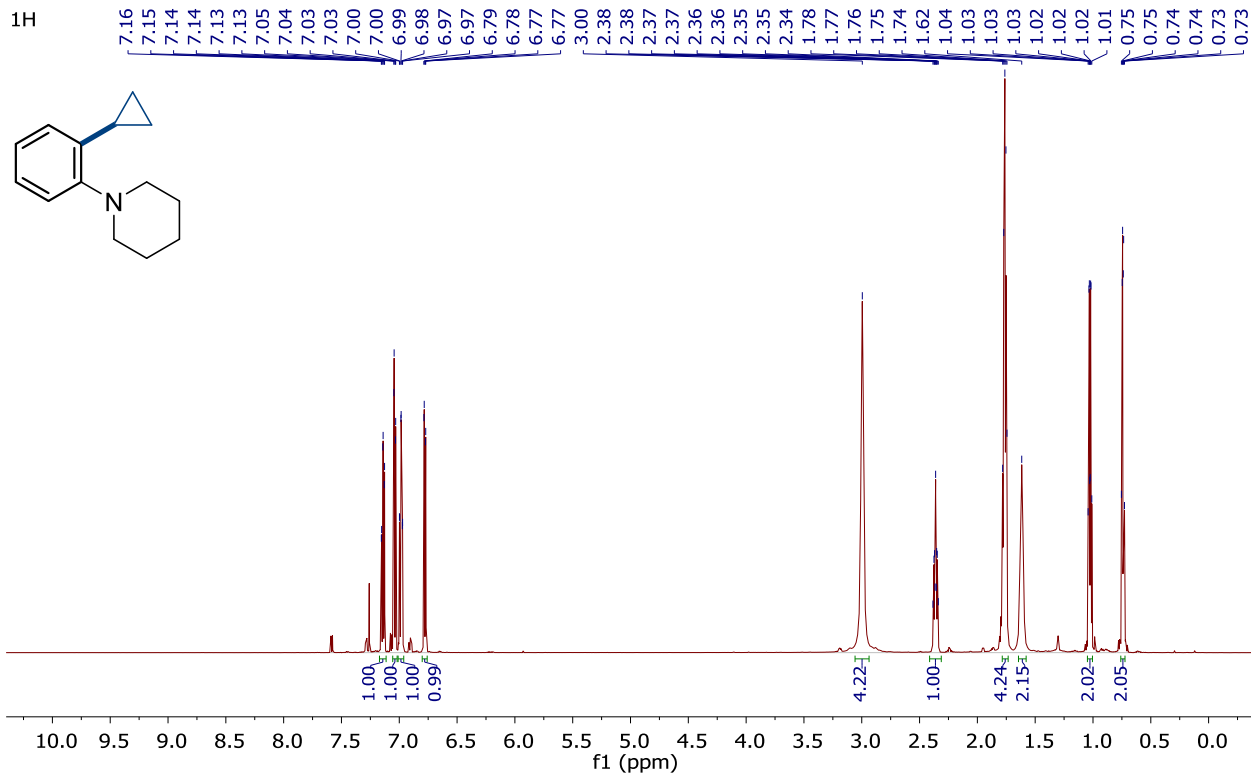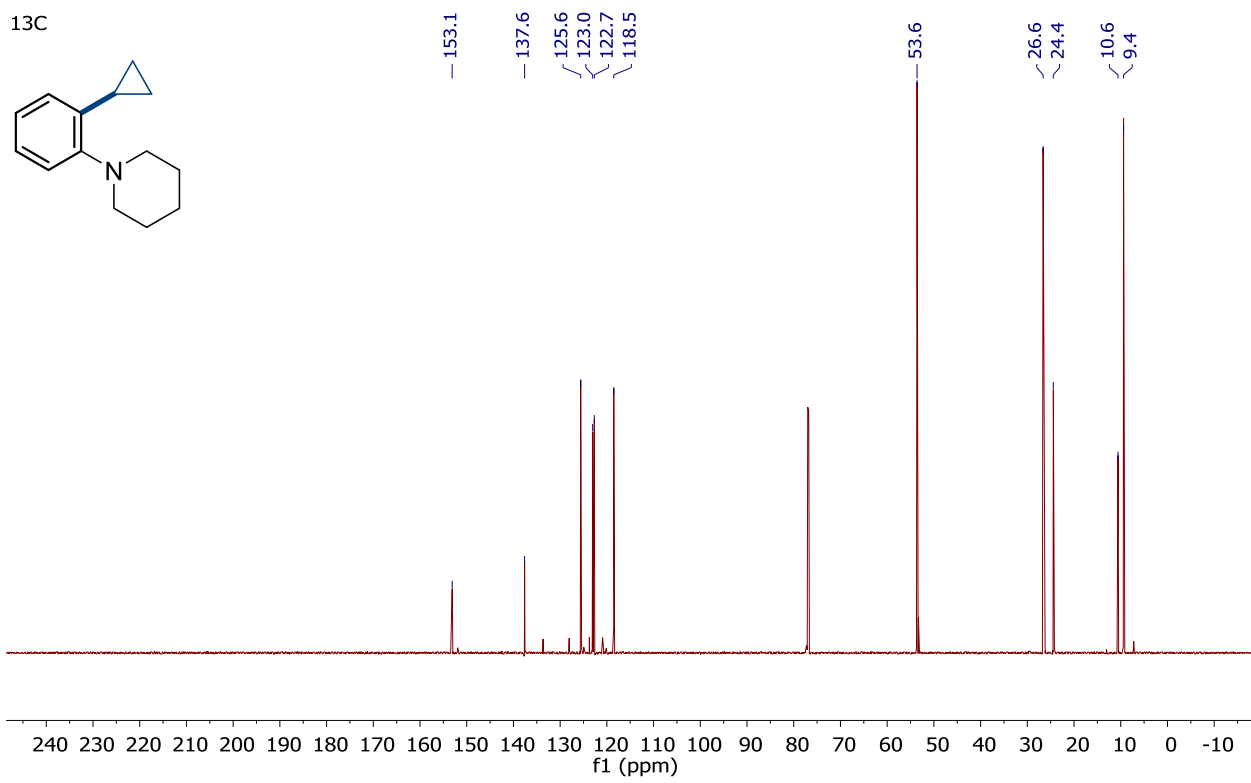

<sup>1</sup>H

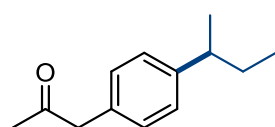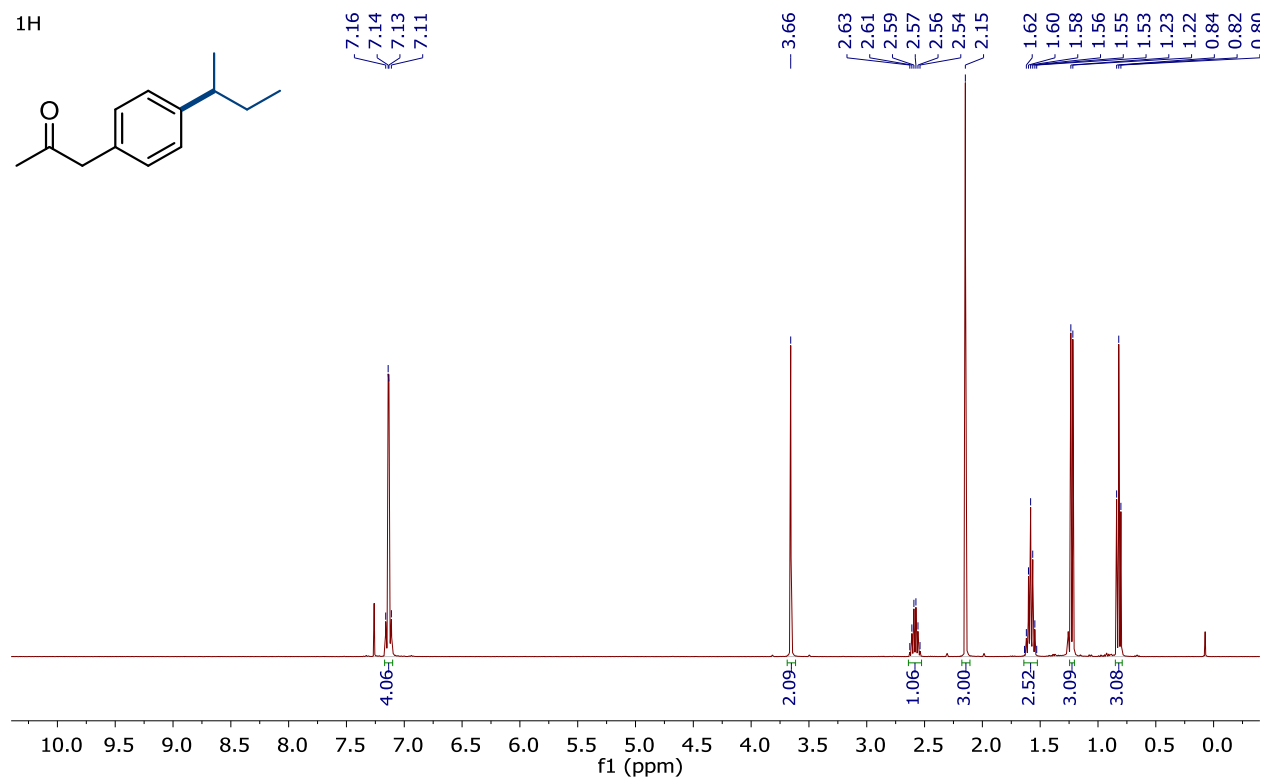

<sup>13</sup>C

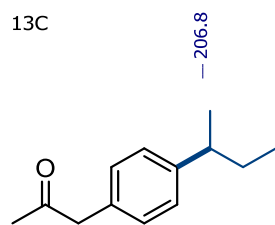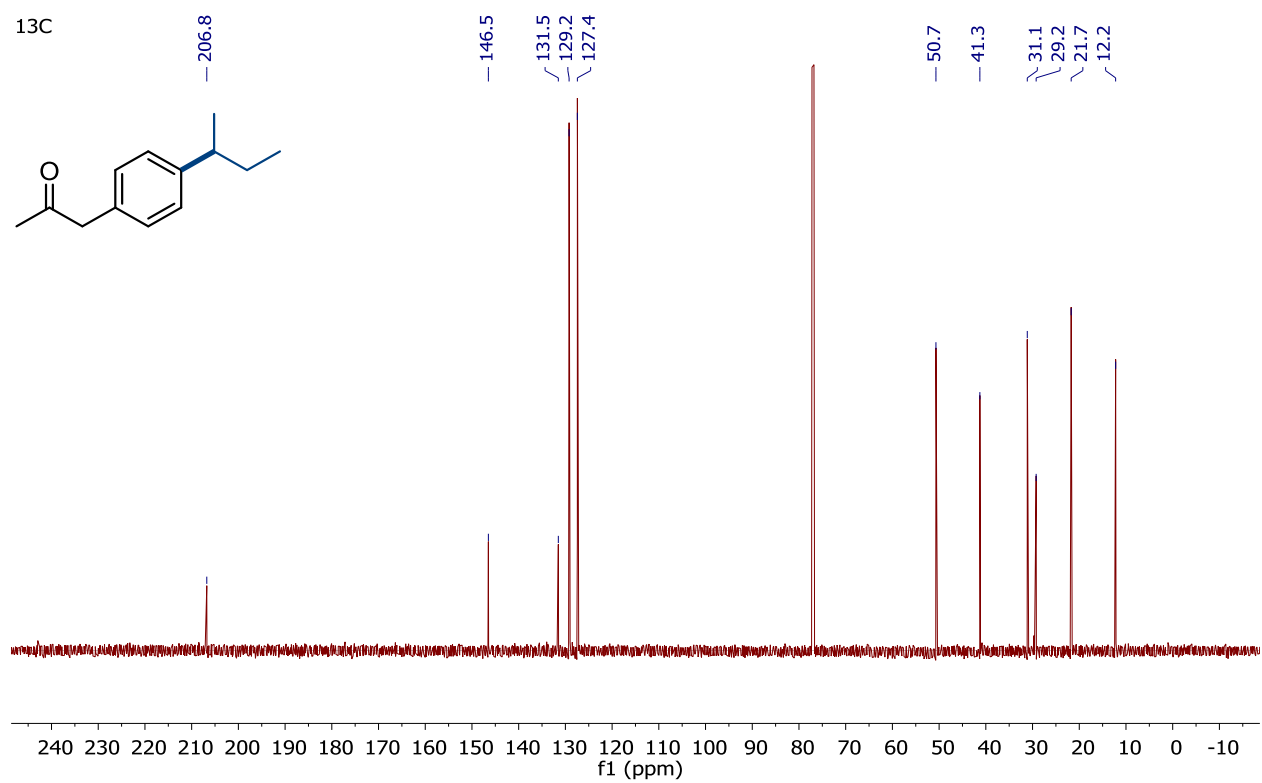



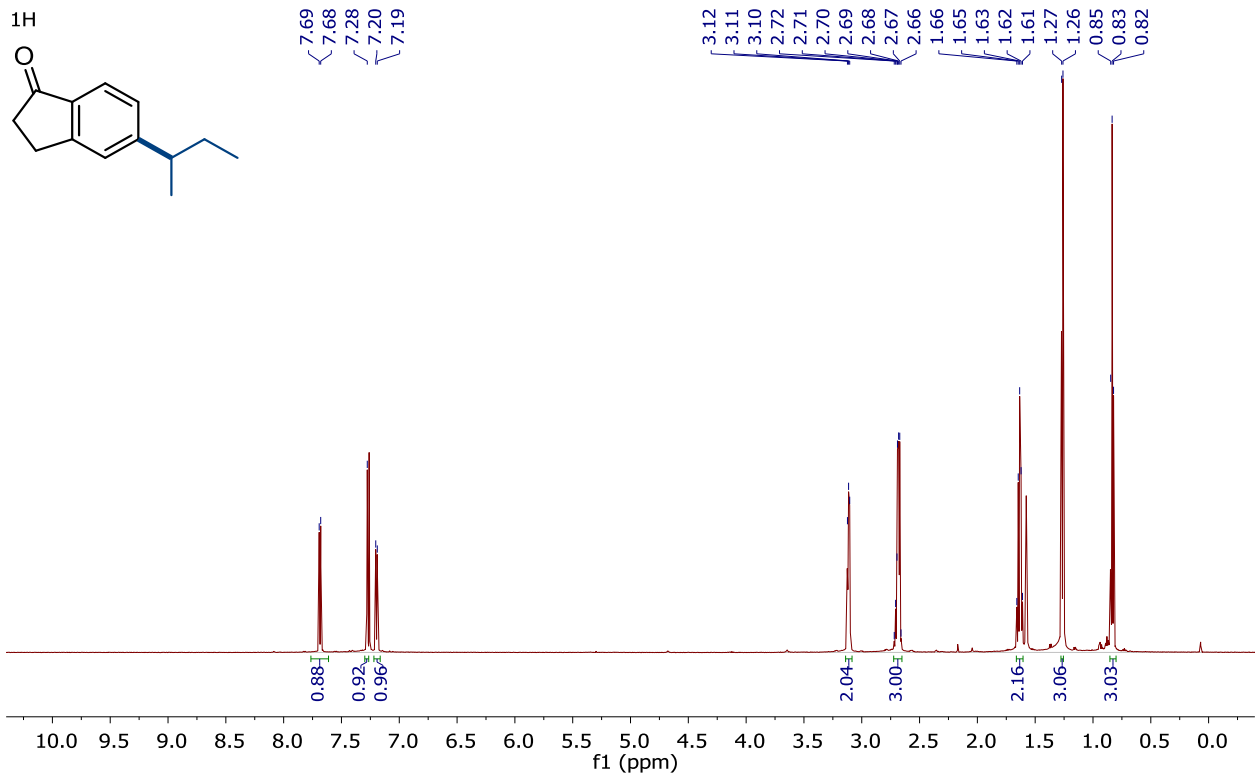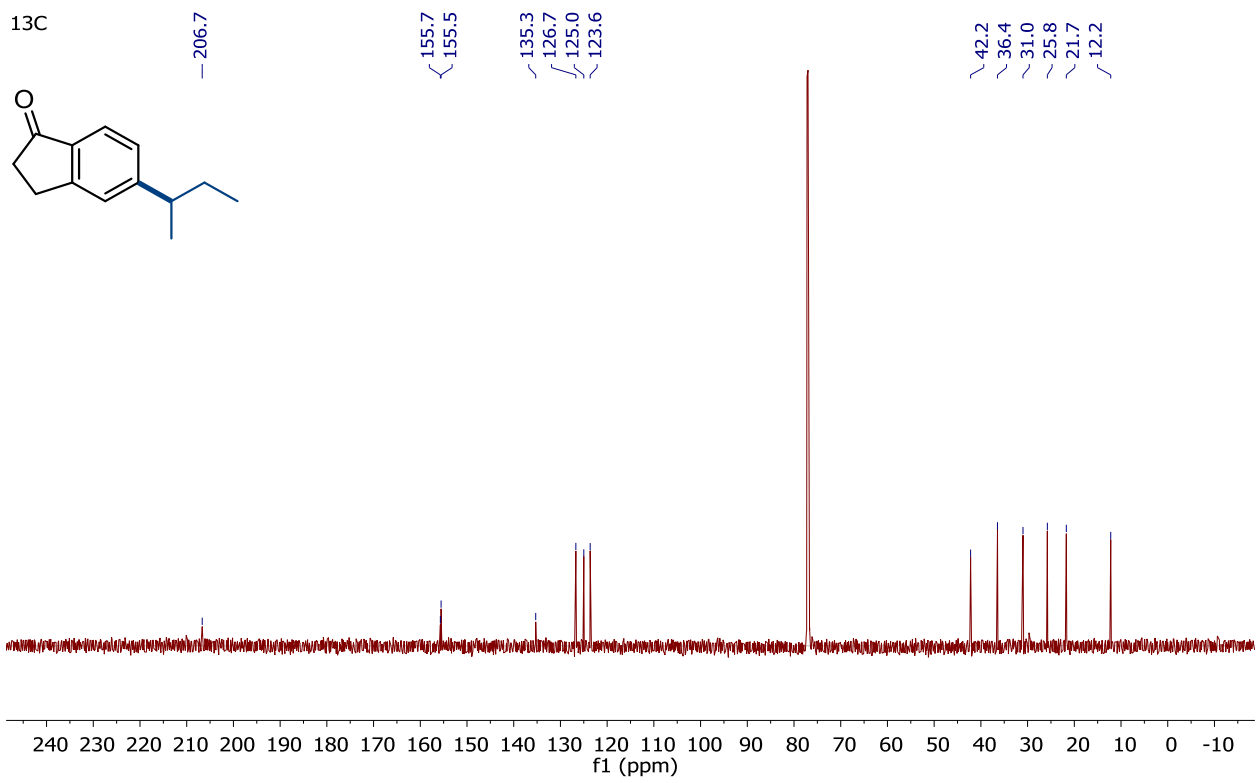

1H

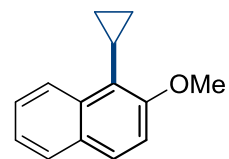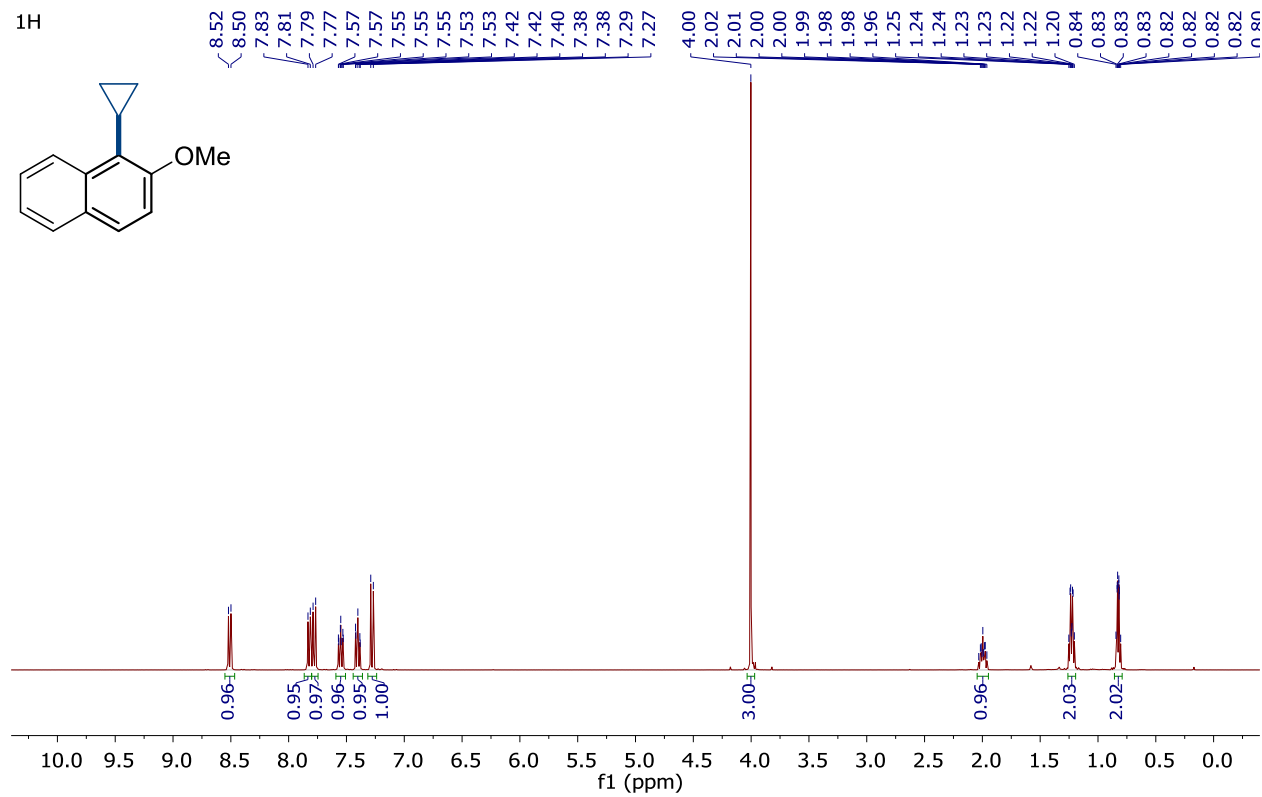

13C

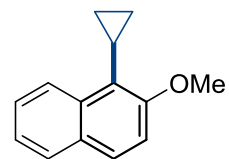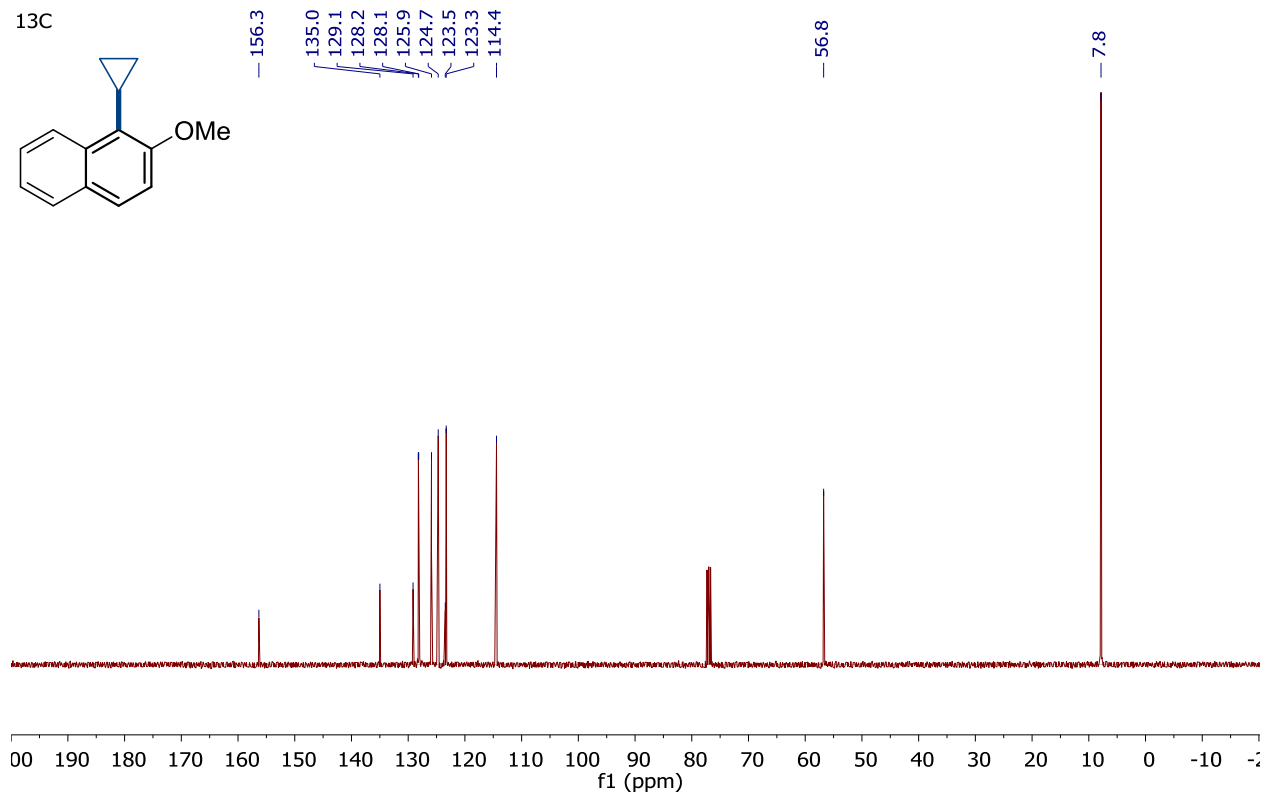

## 7. References

- [1] M. Aufiero, T. Sperger, A. S. K. Tsang, F. Schoenebeck, *Angew. Chem. Int. Ed.* **2015**, *54*, 10322.
- [2] I. Kalvet, G. Magnin, F. Schoenebeck, *Angew. Chem. Int. Ed.* **2017**, *56*, 1581.
- [3] T. D. Blumke, F. M. Piller, P. Knochel, *Chem. Commun.* **2010**, *46*, 4082.
- [4] D. Heijnen, F. Tosi, C. Vila, M. C. A. Stuart, P. H. Elsinga, W. Szymanski, B. L. Feringa, *Angew. Chem. Int. Ed.* **2017**, *56*, 3354.
- [5] T. Schwier, V. Gevorgyan, *Org. Lett.* **2005**, *7*, 5191.
- [6] A. Del Grosso, J. Ayuso Carrillo, M. J. Ingleson, *Chem. Commun.* **2015**, *51*, 2878.
- [7] T. H. Wöste, K. Muñiz, *Synthesis* **2016**, *48*, 816.
- [8] Zhang, N. Synthesis and Functionalization of Optically Active C-Allylglycine Derivatives. Doctoral Dissertation, Freie Universität Berlin, Berlin, 2003.
- [9] J. Jin, S. M. Weinreb, *J. Am. Chem. Soc.* **1997**, *119*, 5773.
- [10] X. Liu, C.-C. Hsiao, I. Kalvet, M. Leiendecker, L. Guo, F. Schoenebeck, M. Rueping, *Angew. Chem. Int. Ed.* **2016**, *55*, 6093.
- [11] K. Gao, N. Yoshikai, *J. Am. Chem. Soc.* **2013**, *135*, 9279.
- [12] E. J. Stoner, D. A. Cothron, M. K. Balmer, B. A. Roden, *Tetrahedron* **1995**, *51*, 11043.
- [13] P. A. Champagne, Y. Benhassine, J. Desroches, J.-F. Paquin, *Angew. Chem. Int. Ed.* **2014**, *53*, 13835.
- [14] M. Pompeo, R. D. J. Froese, N. Hadei, M. G. Organ, *Angew. Chem. Int. Ed.* **2012**, *51*, 11354.
- [15] D. Qiu, L. Jin, Z. Zheng, H. Meng, F. Mo, X. Wang, Y. Zhang, J. Wang, *J. Org. Chem.* **2013**, *78*, 1923.
- [16] B. Bhayana, B. P. Fors, S. L. Buchwald, *Org. Lett.* **2009**, *11*, 3954.
- [17] C.-Q. Tan, X. Zheng, Z. Ma, Y. Gu, *Synth. Commun.* **1999**, *29*, 123.
- [18] Gaussian 09, Revision E.01, M. J. Frisch, G. W. Trucks, H. B. Schlegel, G. E. Scuseria, M. A. Robb, J. R. Cheeseman, G. Scalmani, V. Barone, B. Mennucci, G. A. Petersson, H. Nakatsuji, M. Caricato, X. Li, H. P. Hratchian, A. F. Izmaylov, J. Bloino, G. Zheng, J. L. Sonnenberg, M. Hada, M. Ehara, K. Toyota, R. Fukuda, J. Hasegawa, M. Ishida, T. Nakajima, Y. Honda, O. Kitao, H. Nakai, T. Vreven, J. A. Montgomery, Jr., J. E. Peralta, F. Ogliaro, M. Bearpark, J. J. Heyd, E. Brothers, K. N. Kudin, V. N. Staroverov, T. Keith, R. Kobayashi, J. Normand, K. Raghavachari, A. Rendell, J. C. Burant, S. S. Iyengar, J. Tomasi, M. Cossi, N. Rega, J. M. Millam, M. Klene, J. E. Knox, J. B. Cross, V. Bakken, C. Adamo, J. Jaramillo, R. Gomperts, R. E. Stratmann, O. Yazyev, A. J. Austin, R. Cammi, C. Pomelli, J. W. Ochterski, R. L. Martin, K. Morokuma, V. G. Zakrzewski, G. A. Voth, P. Salvador, J. J. Dannenberg, S. Dapprich, A. D. Daniels, O. Farkas, J. B. Foresman, J. V. Ortiz, J. Cioslowski, and D. J. Fox, Gaussian, Inc., Wallingford CT, 2016.
- [19] CYLview, 1.0b; C. Y. Legault, Université de Sherbrooke, 2009 (<http://www.cylview.org>)
